# Supplementary material for: Solvent and Substituent Size Influence on the Cyclochiral Rigidity of Aminomethylene Derivatives of Resorcin[4]arene
Source: MDPI journal article supplement (doi:10.3390/molecules28217426), 2023-11-04
Supplement: s1 [file s1]

Solvent and substituent size influence on the cyclochiral rigidity of aminomethylene  
derivatives of resorcin[4]arene

Waldemar Iwanek

Bydgoszcz University of Technology, Faculty of Chemical Technology and Engineering,  
Seminarnyja 3, 85-326 Bydgoszcz, Poland.

E-mail: Waldemar.Iwanek@pbs.edu.pl

Supporting information

1. NMR spectra of AMD-R[4]A.
2. The xyz coordinates of the optimized structures in  $\text{CHCl}_3$ .

1. NMR spectra of AMD-R[4]A.

NMR Spectra of **1**

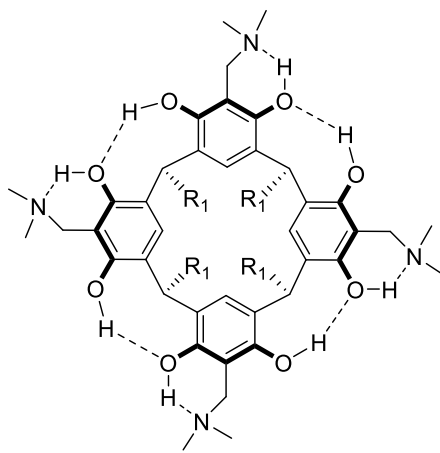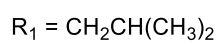

$^1\text{H}$  NMR –  $\text{CDCl}_3$

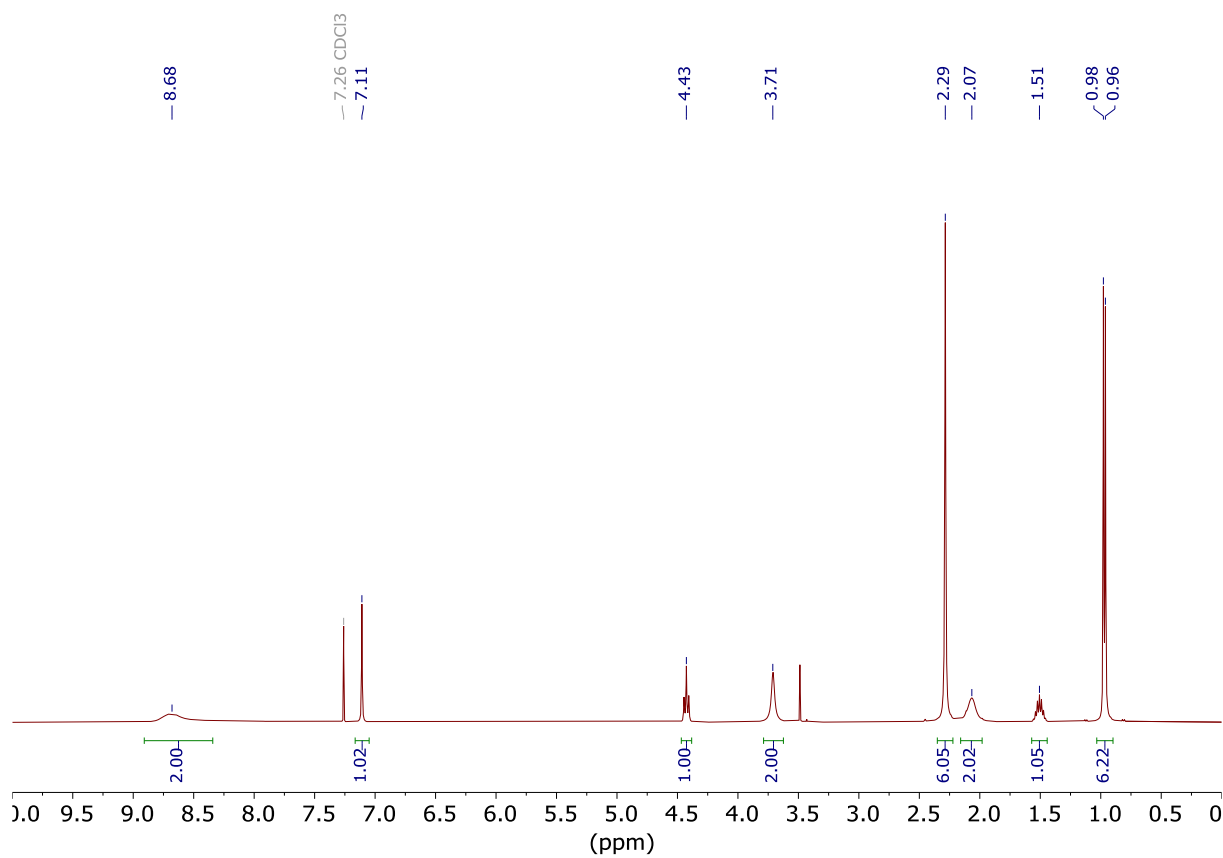

<sup>13</sup>C NMR – CDCl<sub>3</sub>

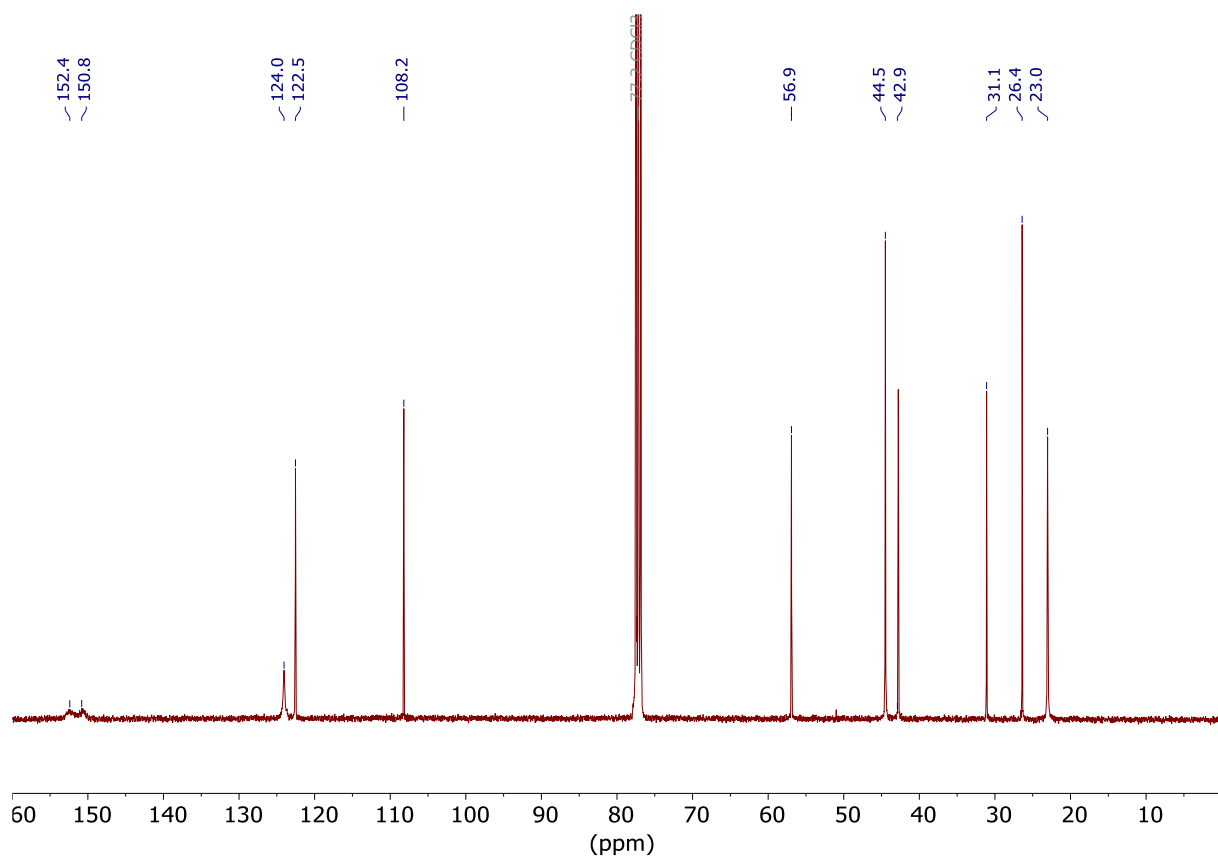

<sup>1</sup>H NMR – CCl<sub>4</sub>

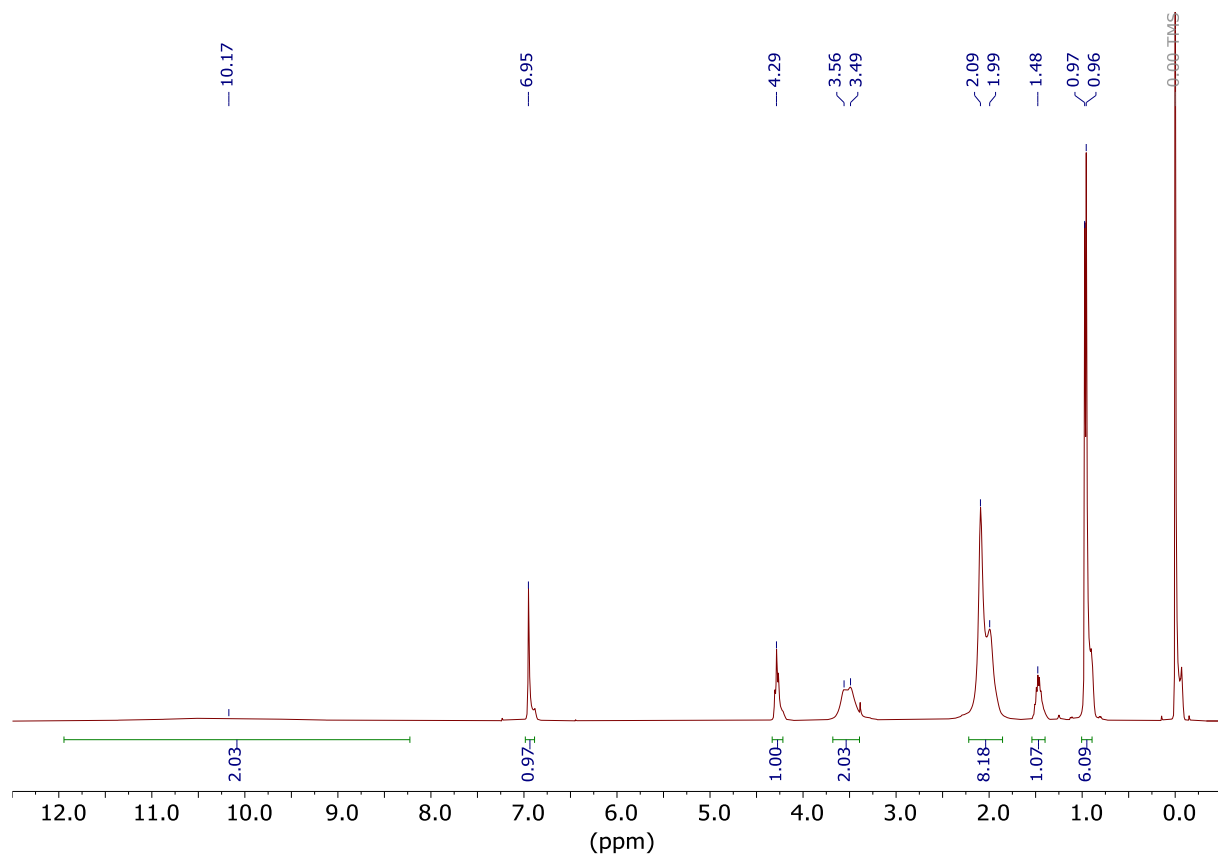

# NMR Spectra of **2**

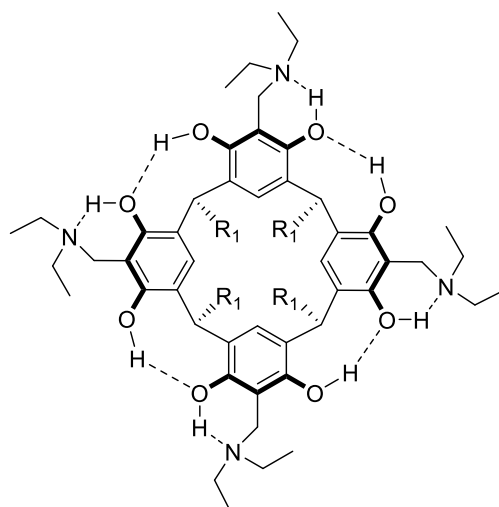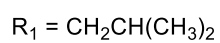

$^1\text{H}$  NMR –  $\text{CDCl}_3$

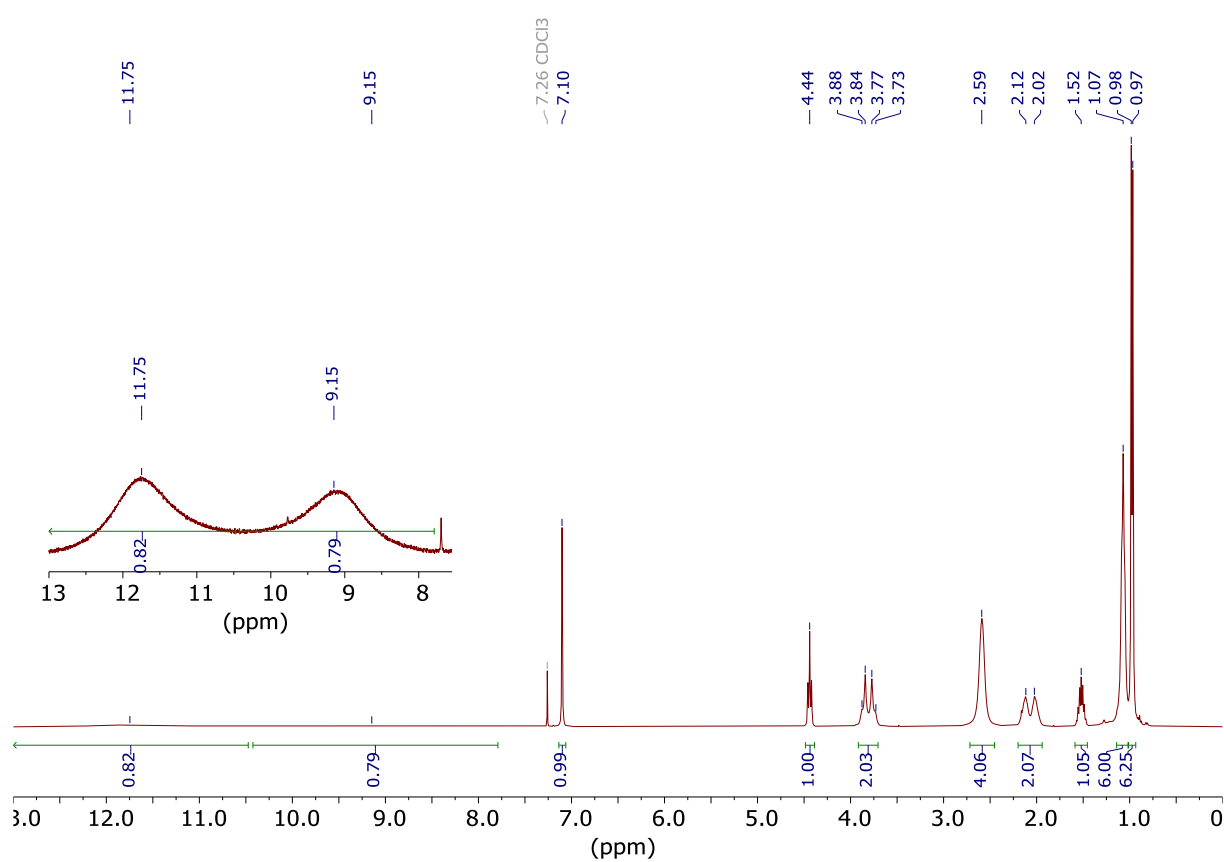

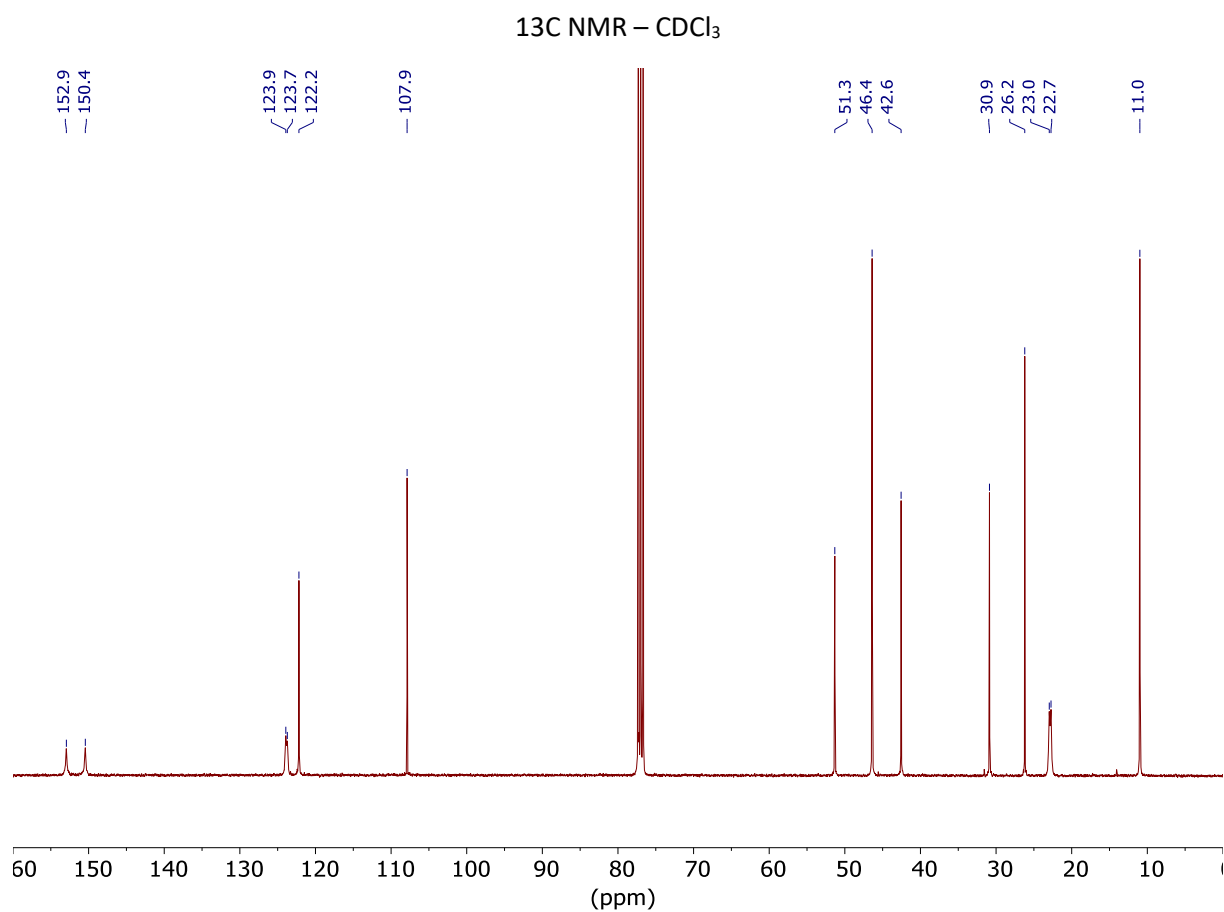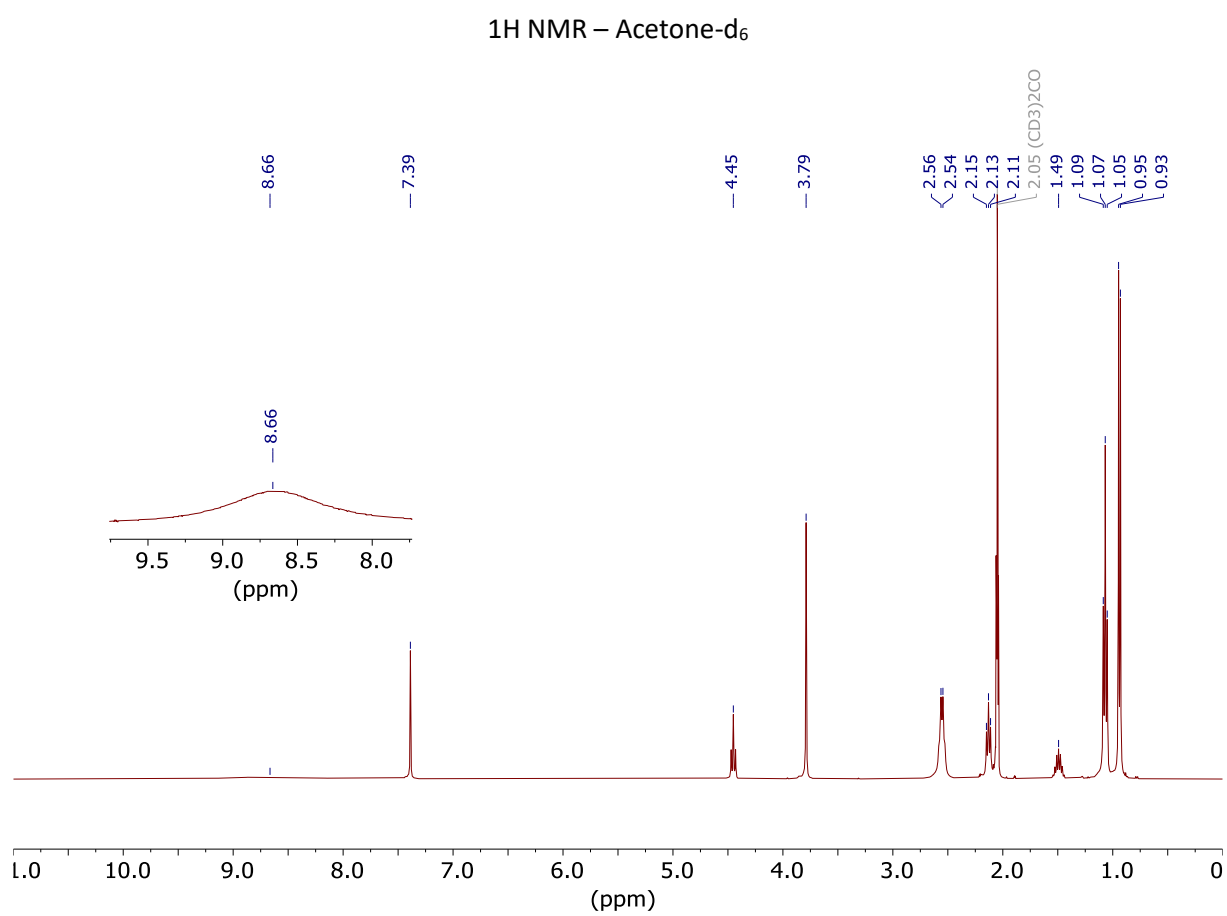

13C NMR – Acetone-d<sub>6</sub>

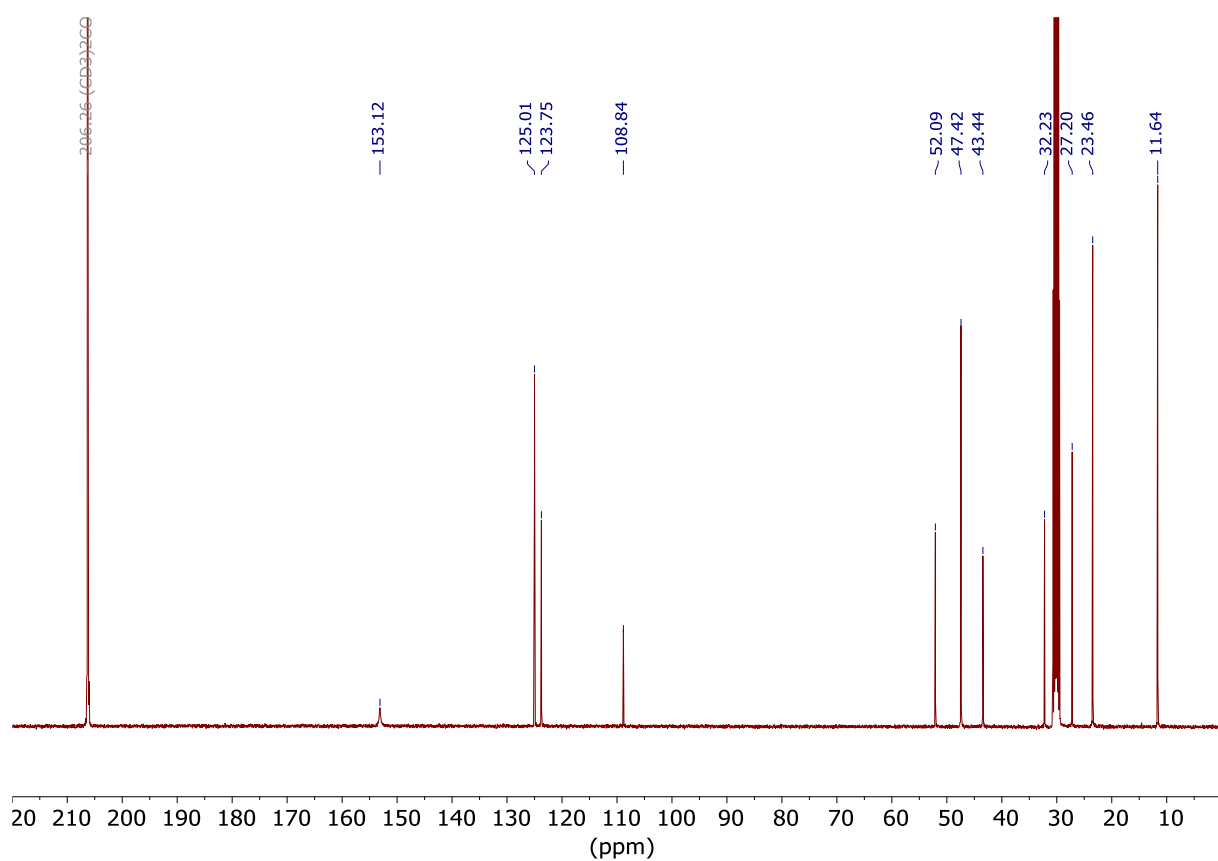

1H NMR - CCl<sub>4</sub>

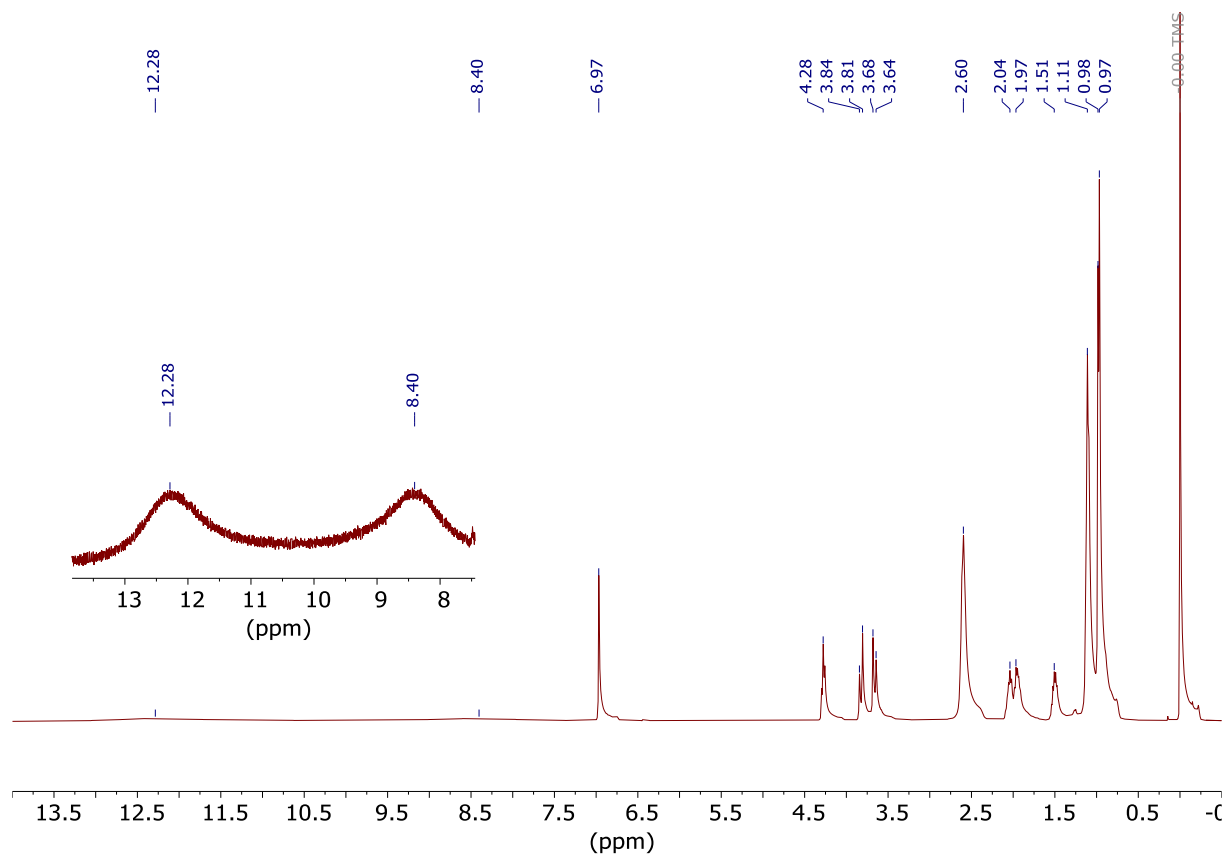

# 1H NMR - Benzene-d<sub>6</sub>

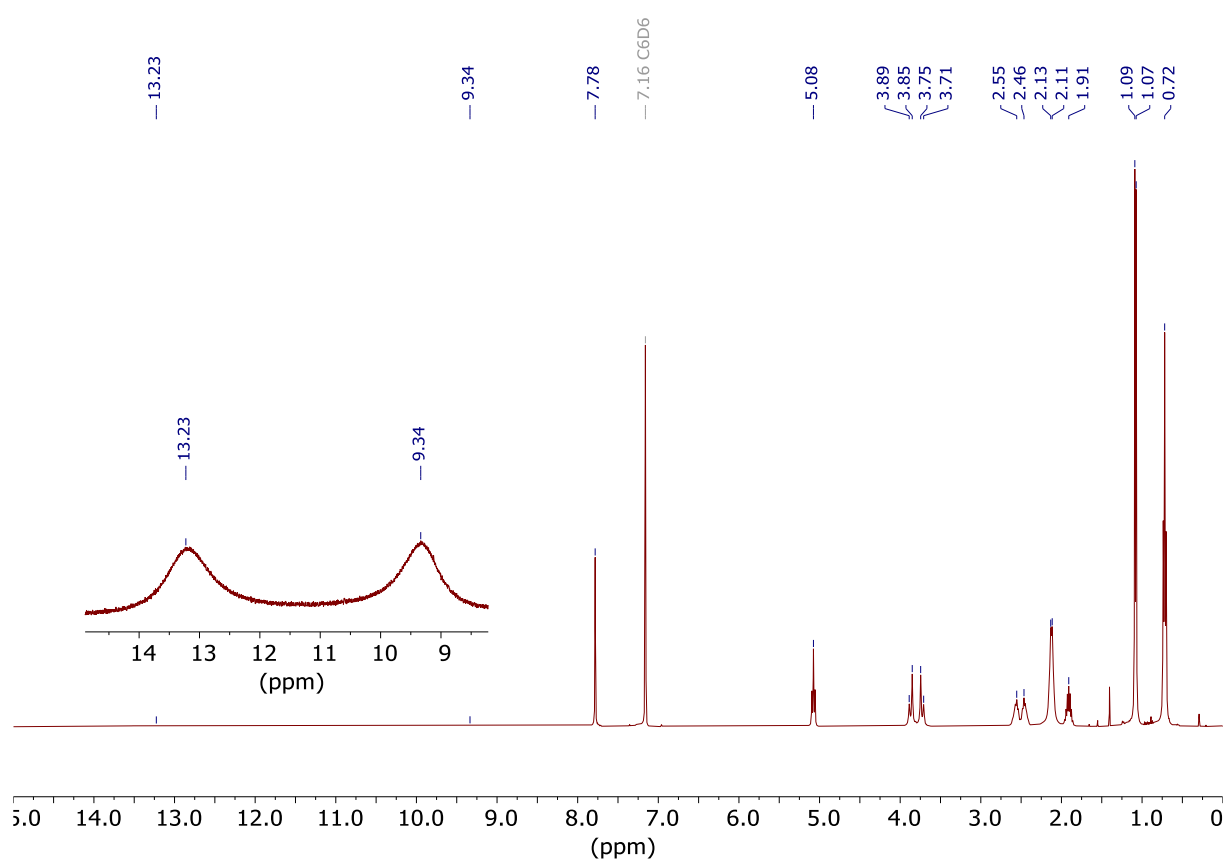

# NMR Spectra of **3**

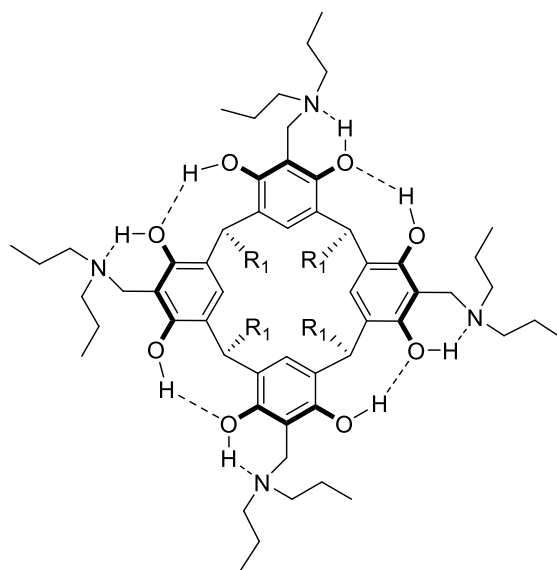

$R_1 = \text{CH}_2\text{CH}(\text{CH}_3)_2$

$^1\text{H}$  NMR –  $\text{CDCl}_3$

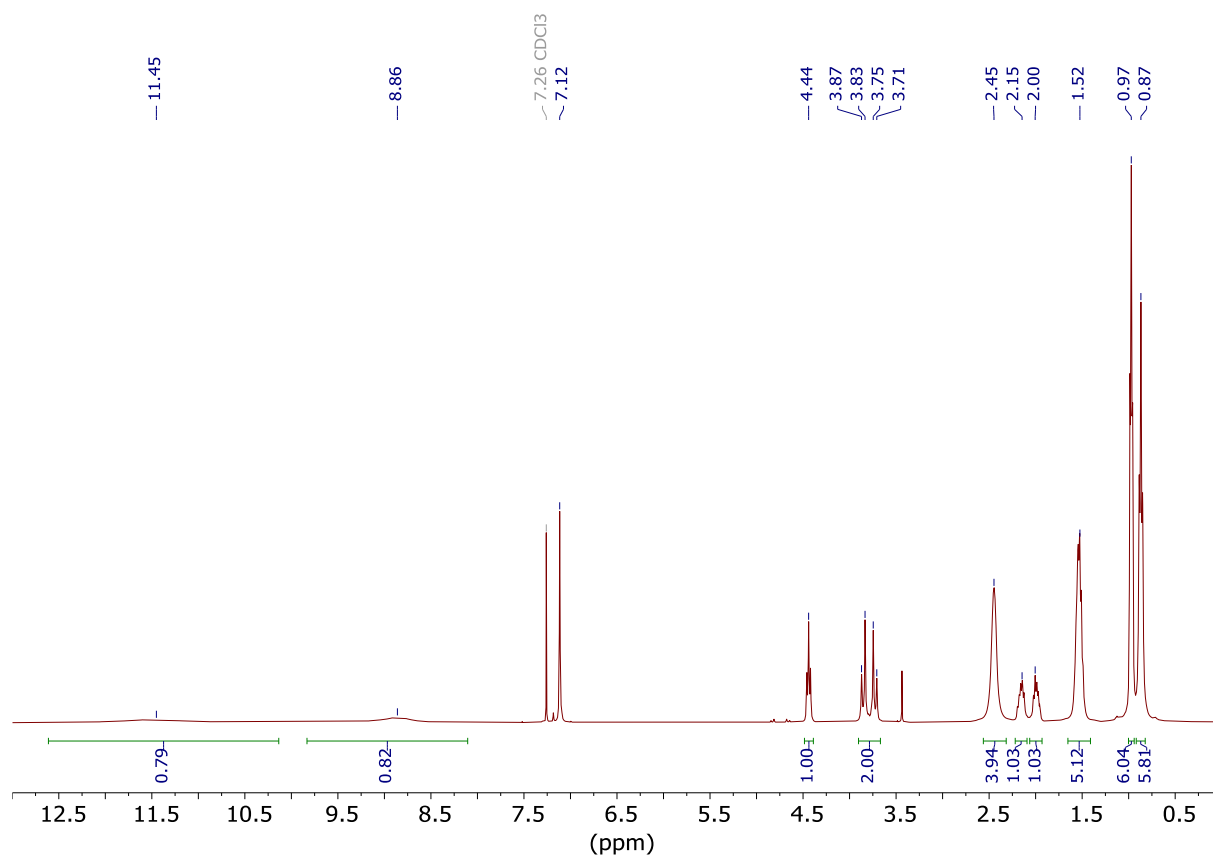



**$^{13}\text{C}$  NMR –  $\text{CDCl}_3$**

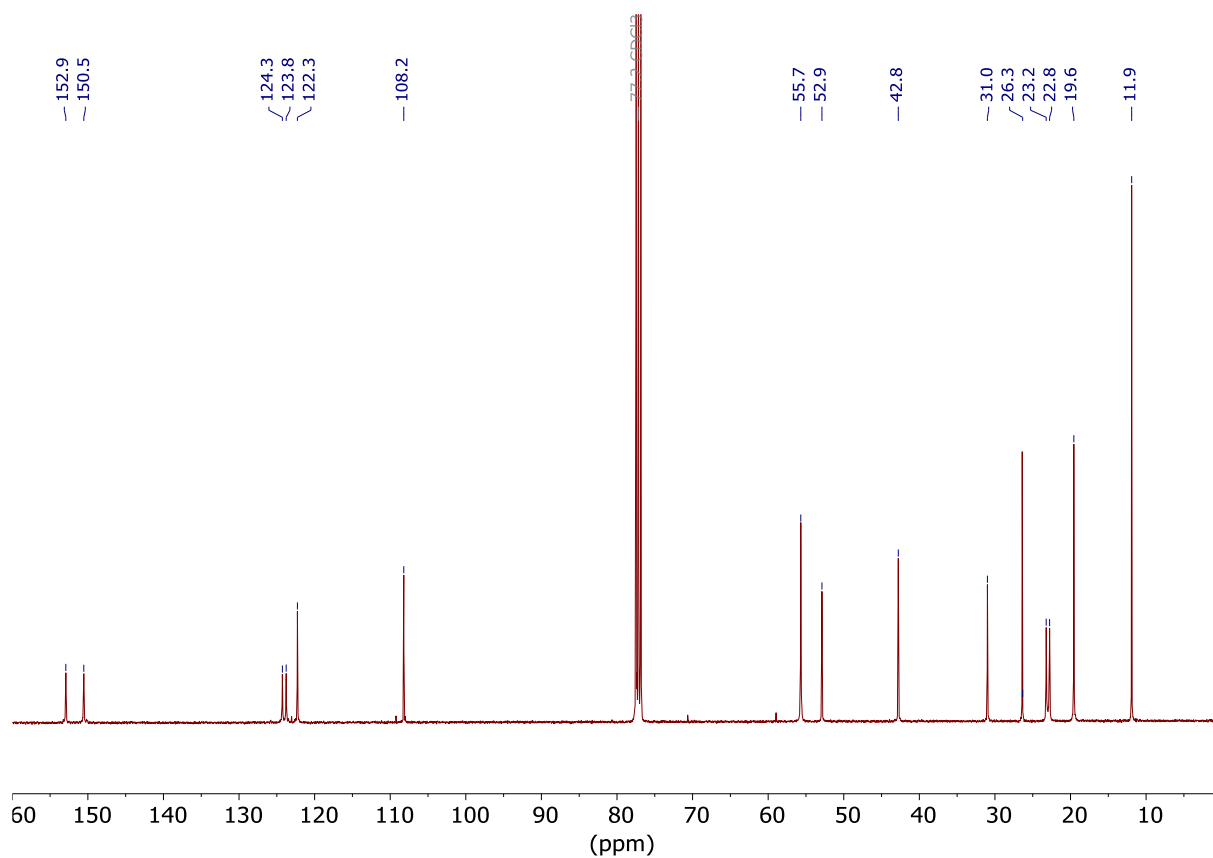

**$^1\text{H}$  NMR –  $\text{CCl}_4$**

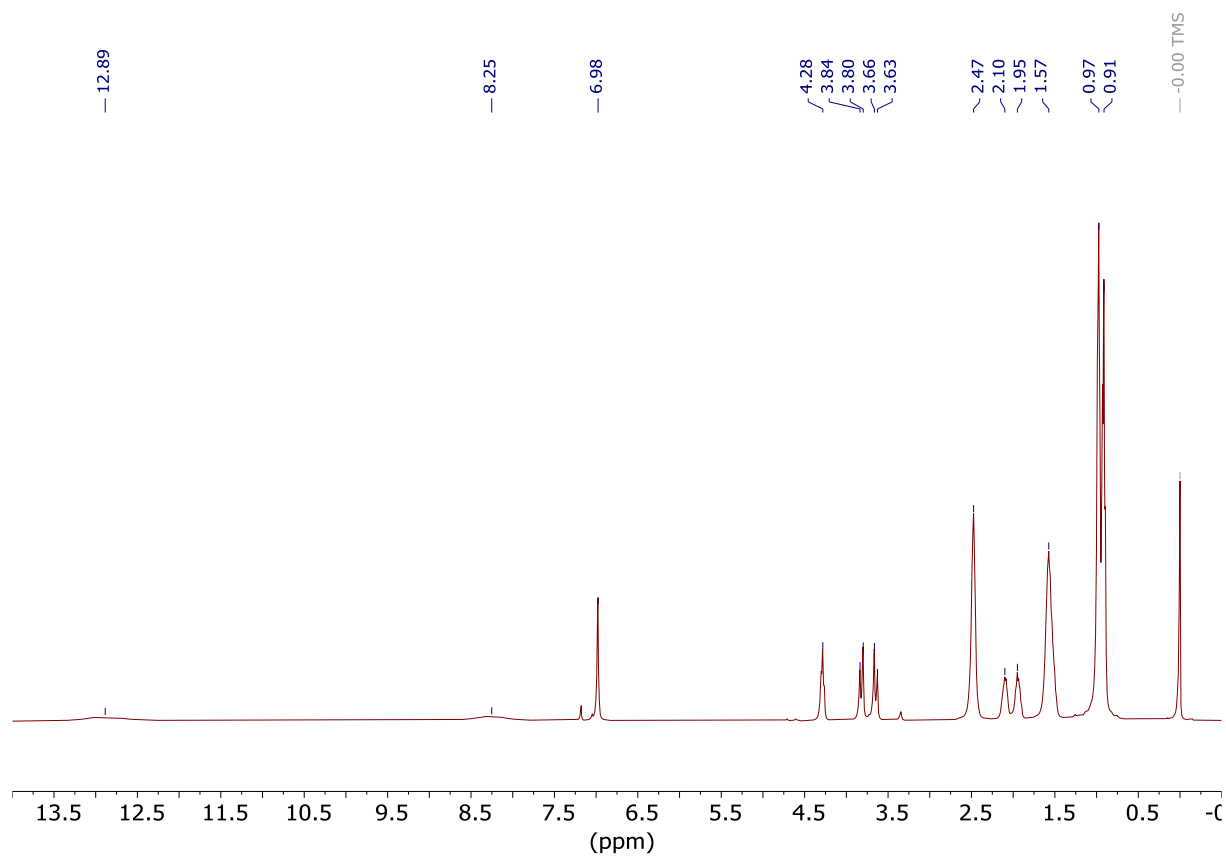

# NMR Spectra of **4**

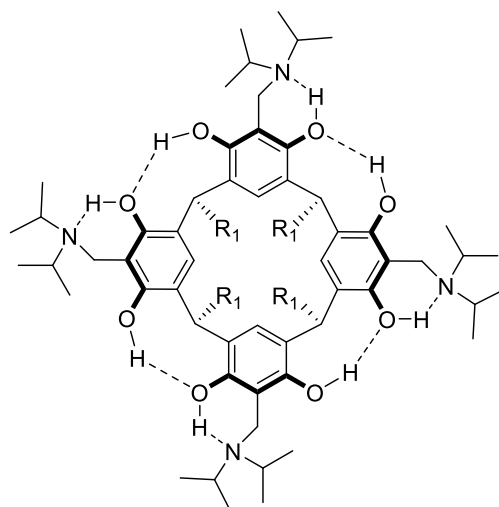

$R_1 = \text{CH}_2\text{CH}(\text{CH}_3)_2$

$^1\text{H}$  NMR –  $\text{CDCl}_3$

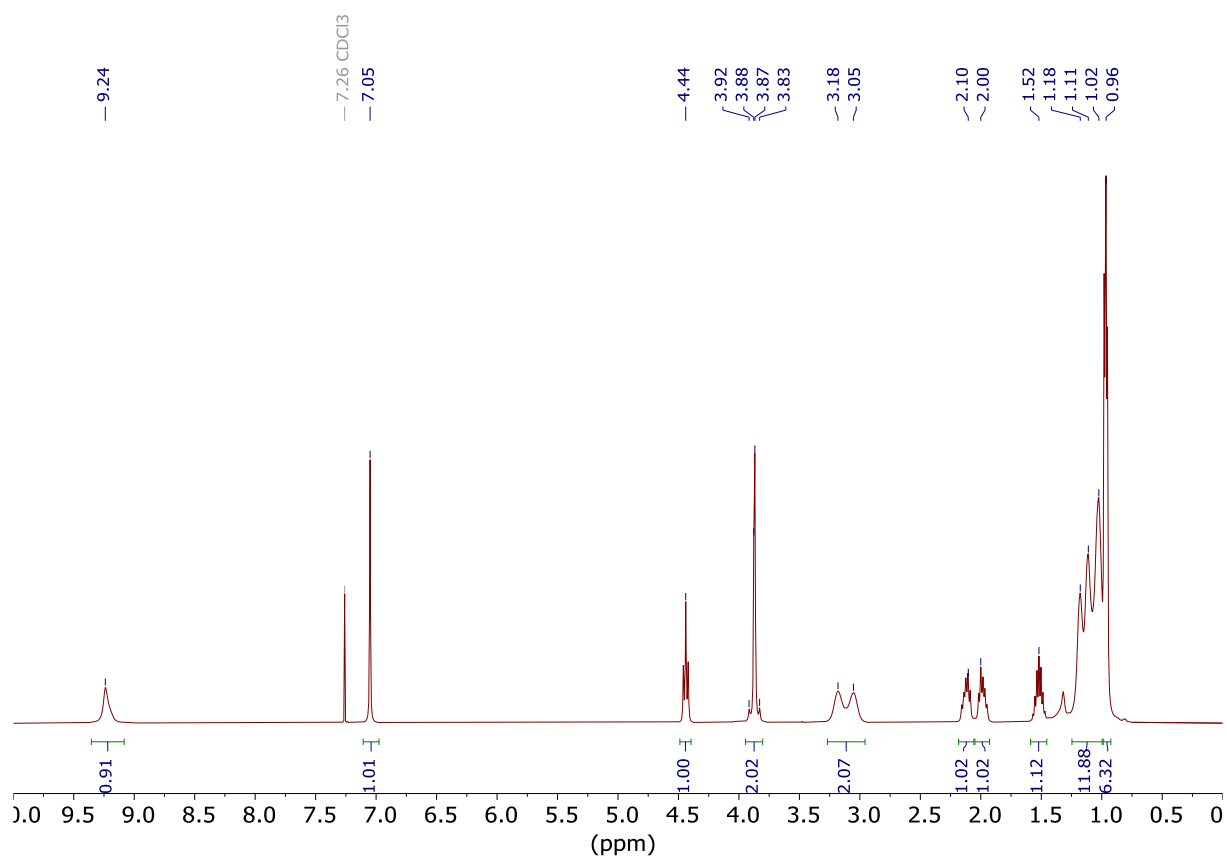

$^{13}\text{C}$  NMR –  $\text{CDCl}_3$

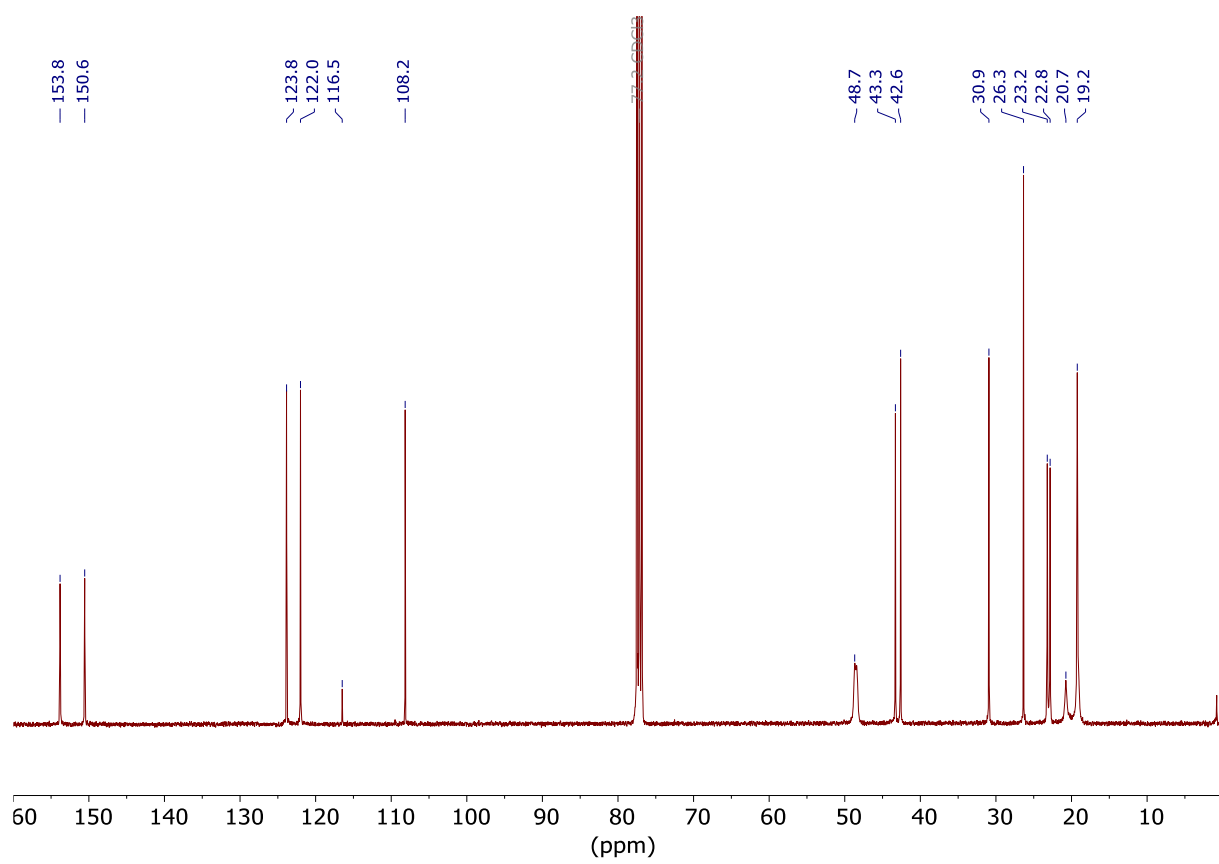

# NMR Spectra of **5**

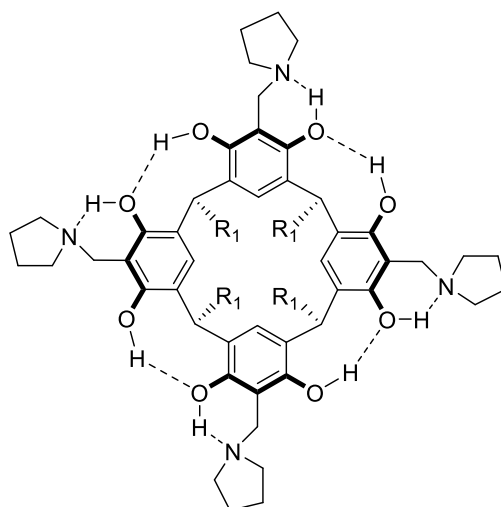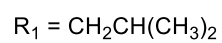

$^1\text{H}$ NMR –  $\text{CDCl}_3$

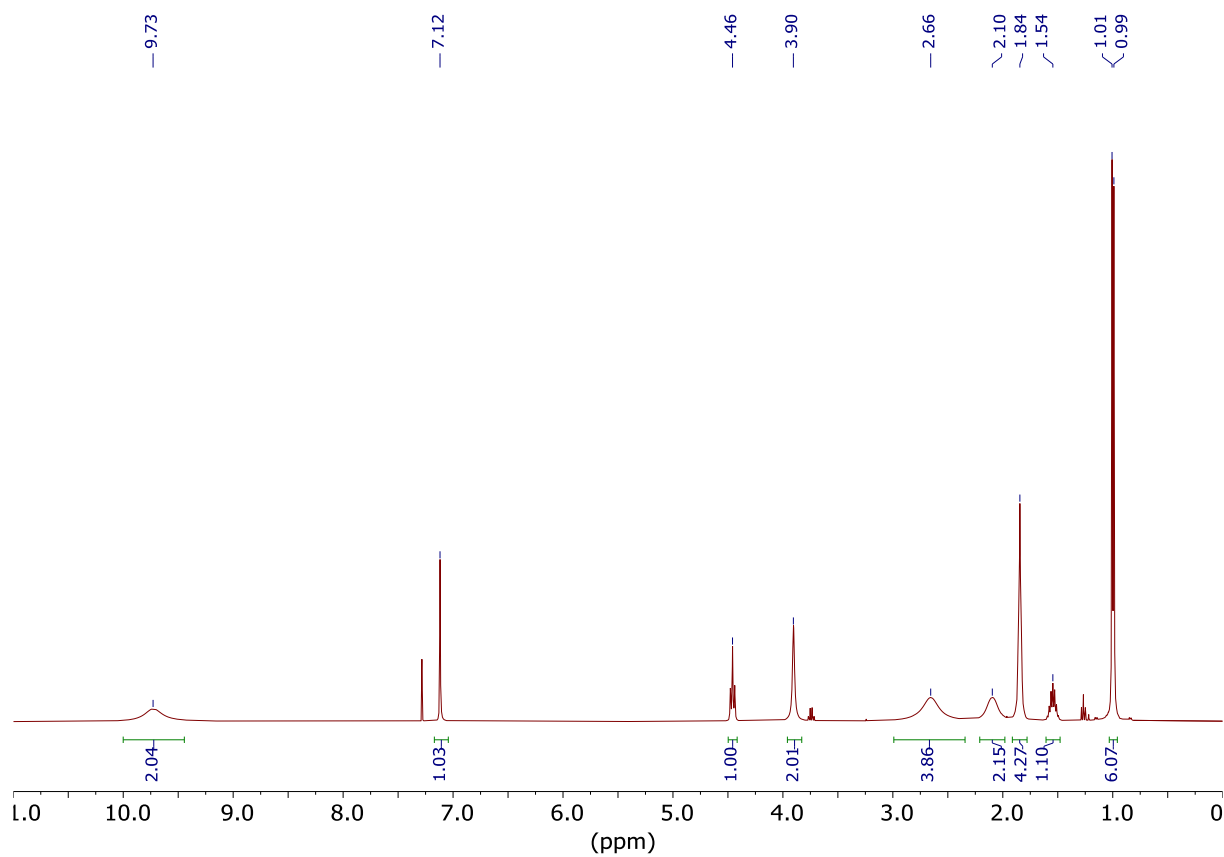

$^{13}\text{C}$  NMR –  $\text{CDCl}_3$

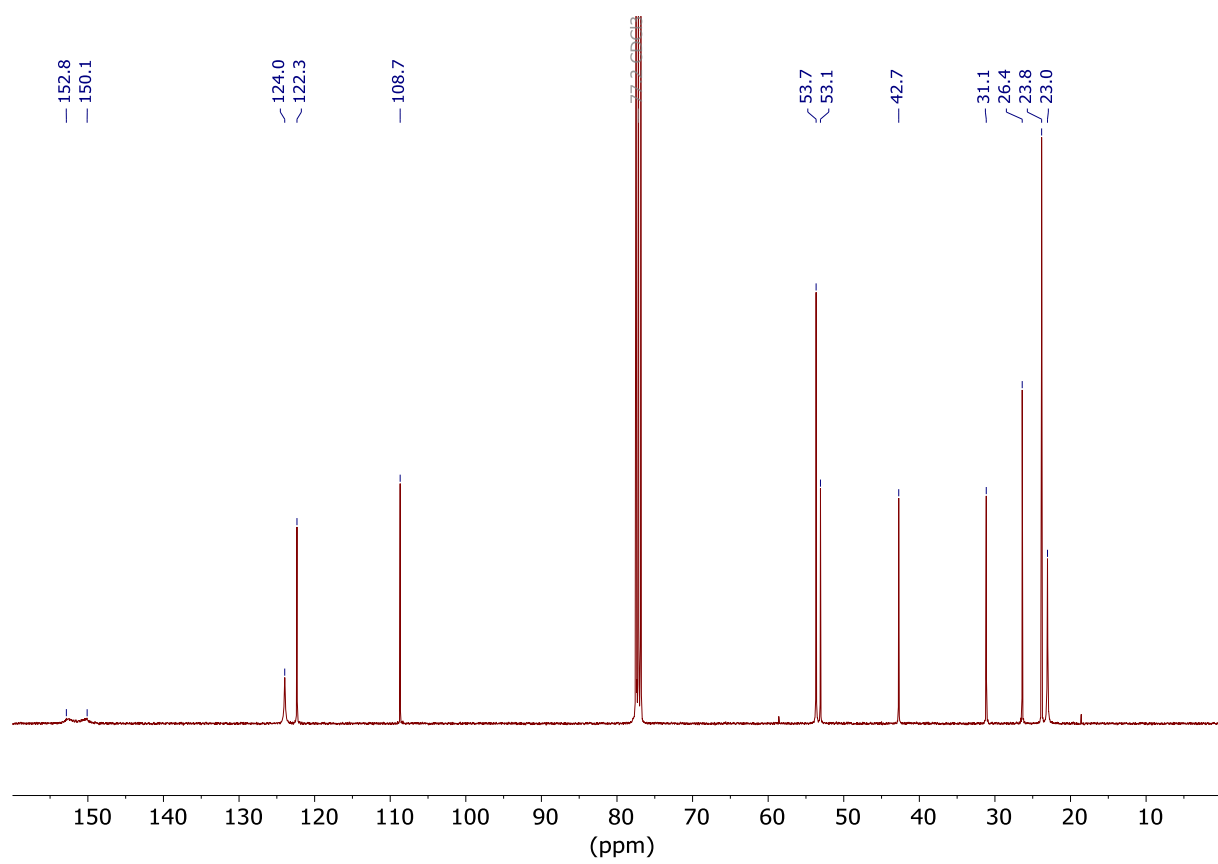

# NMR Spectra of **6**

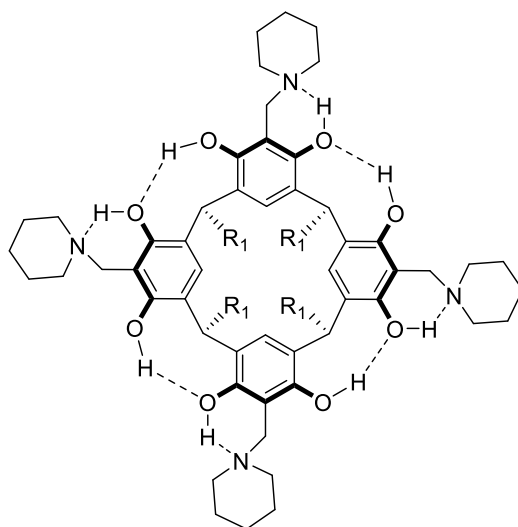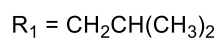

$^1\text{H}$  NMR –  $\text{CDCl}_3$

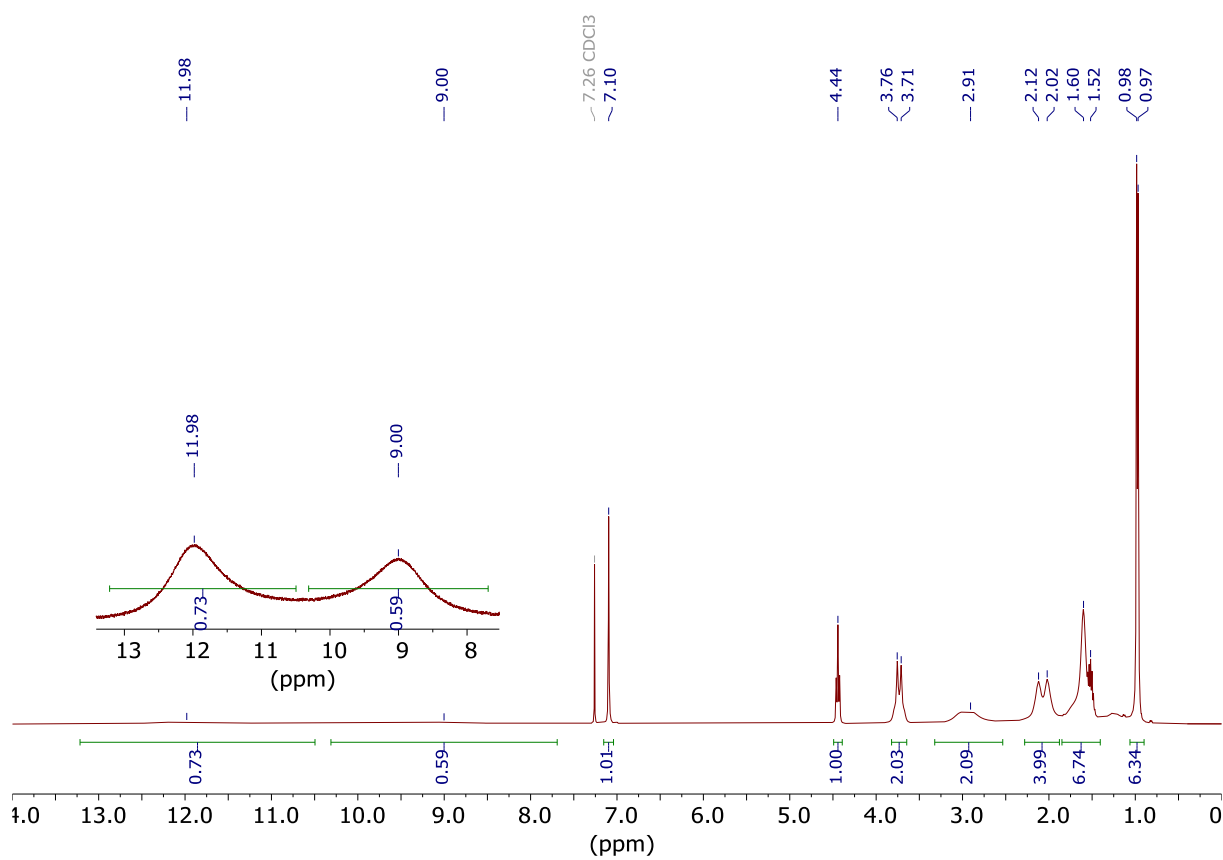

$^{13}\text{C}$  NMR –  $\text{CDCl}_3$

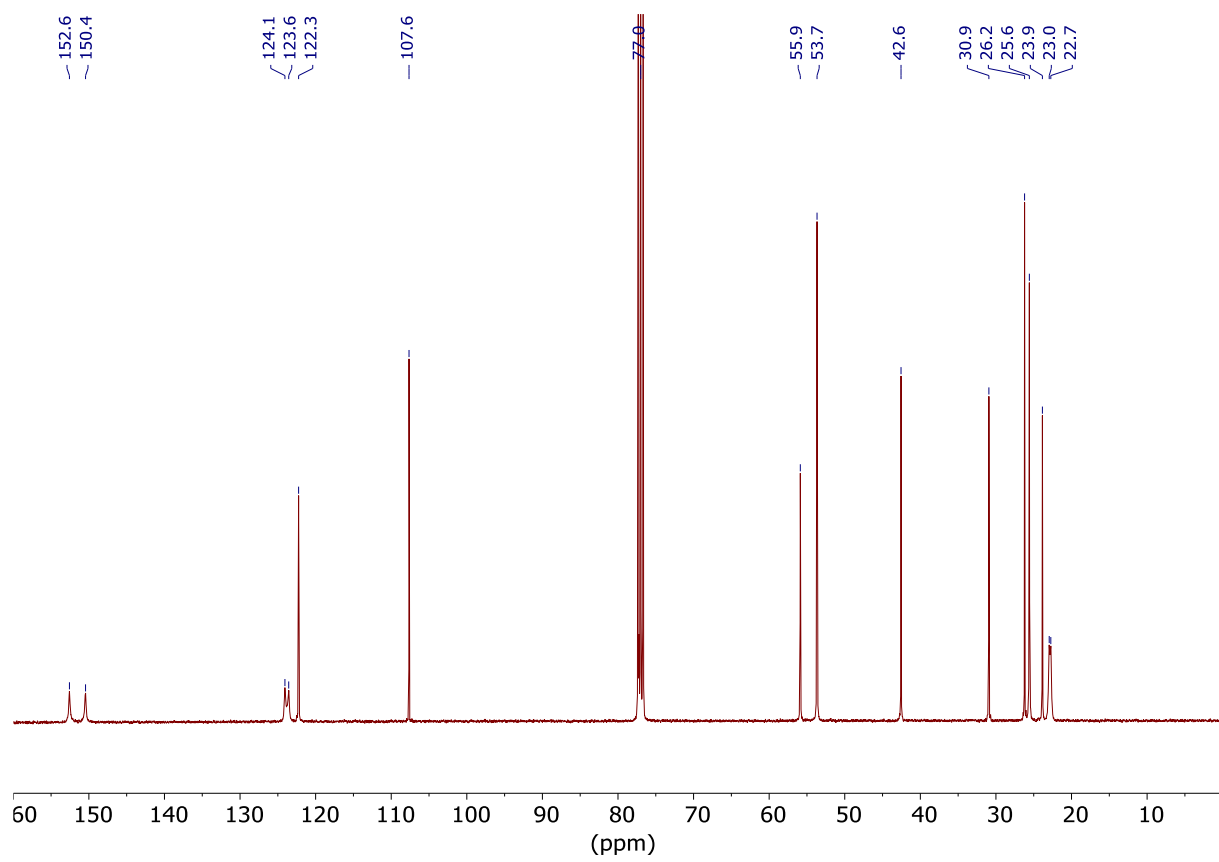

# NMR Spectra of **7**

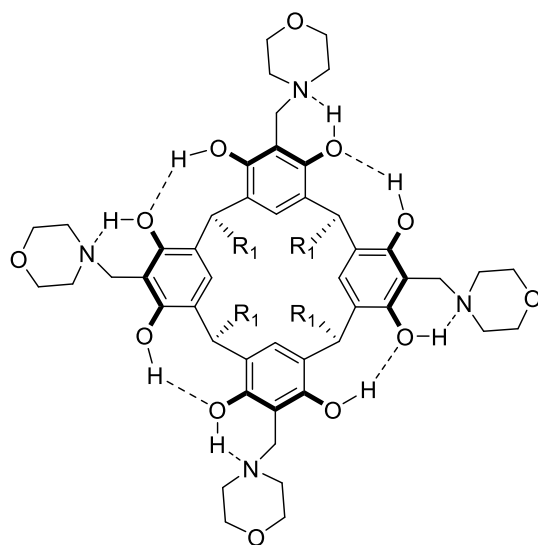

$R_1 = \text{CH}_2\text{CH}(\text{CH}_3)_2$

$^1\text{H}$  NMR –  $\text{CDCl}_3$

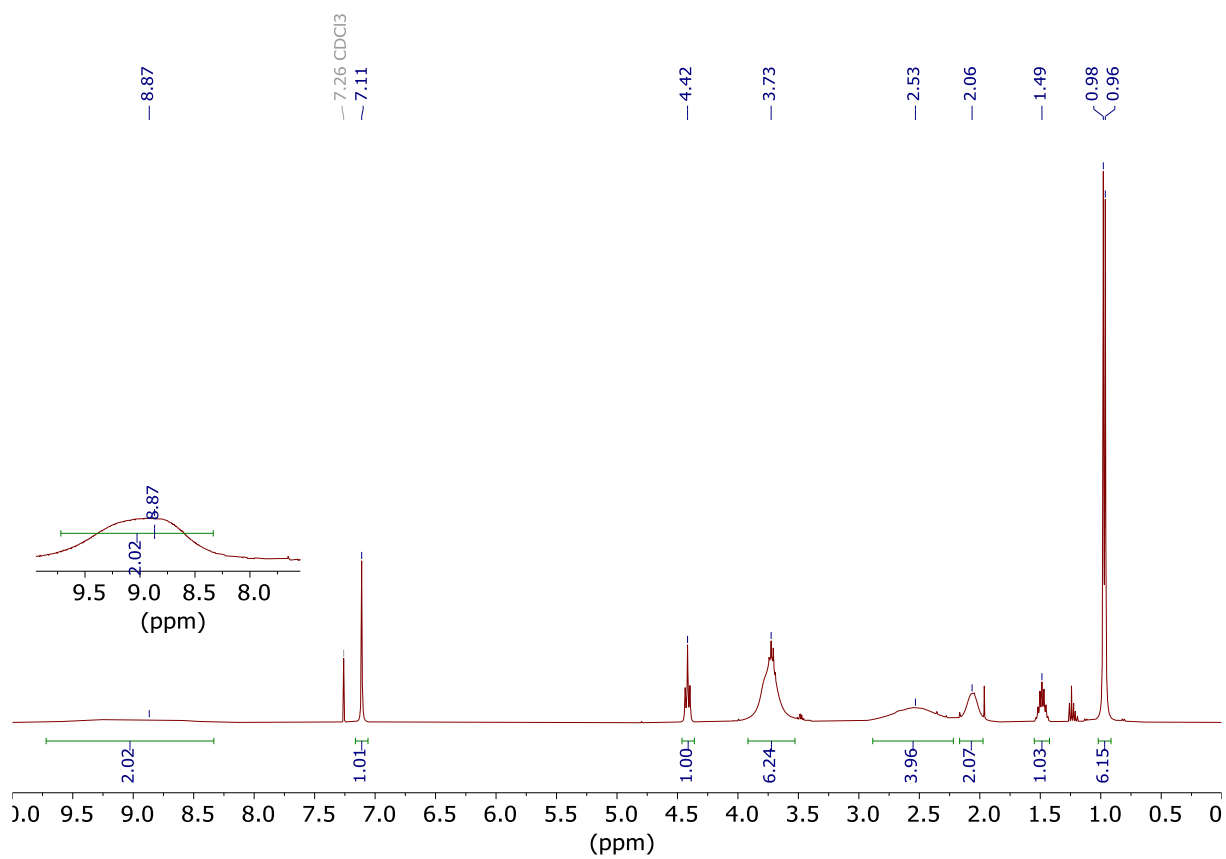



$^{13}\text{C}$  NMR –  $\text{CDCl}_3$

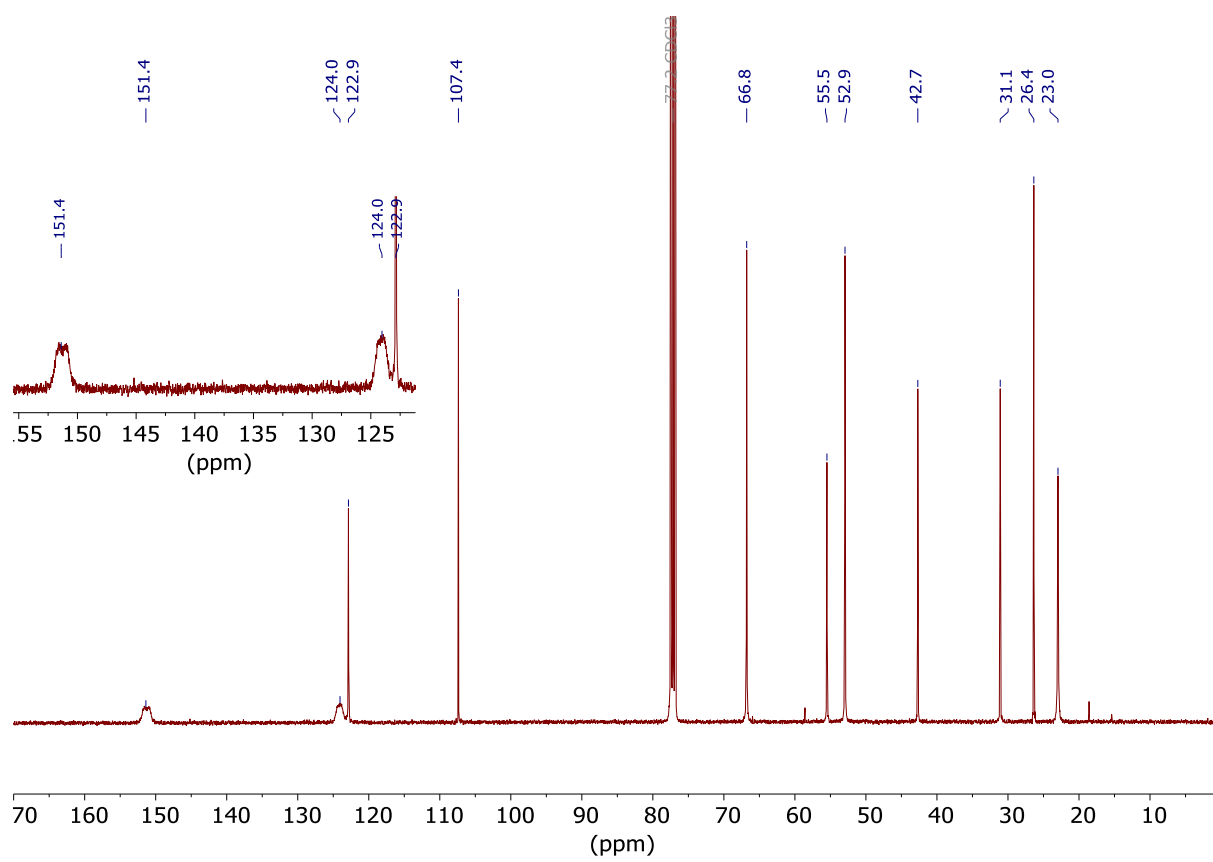

# NMR Spectra of **8**

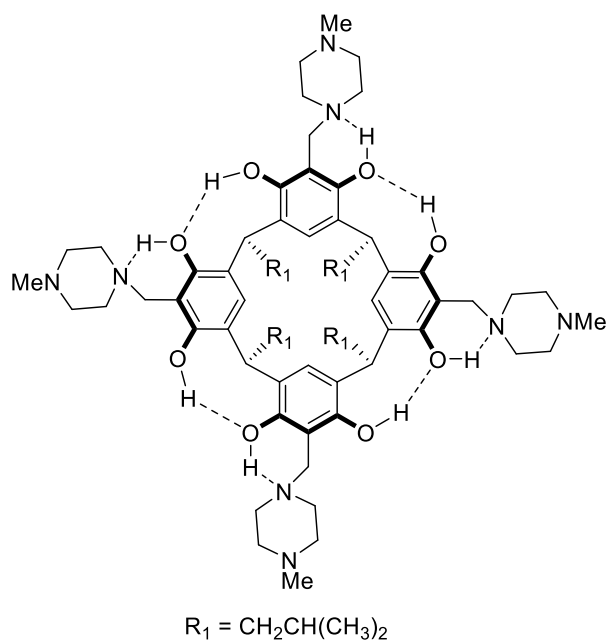

$^1\text{H}$  NMR –  $\text{CDCl}_3$

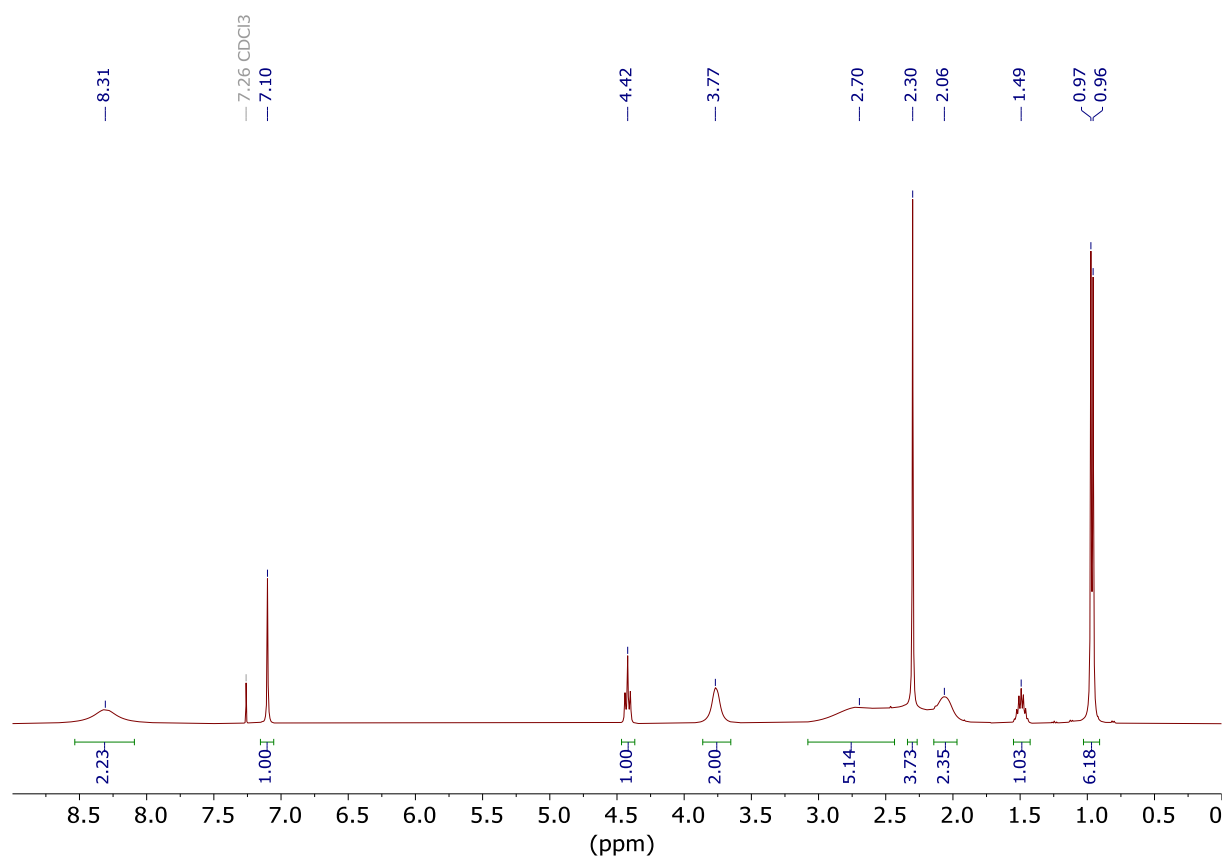

$^{13}\text{C}$  NMR –  $\text{CDCl}_3$

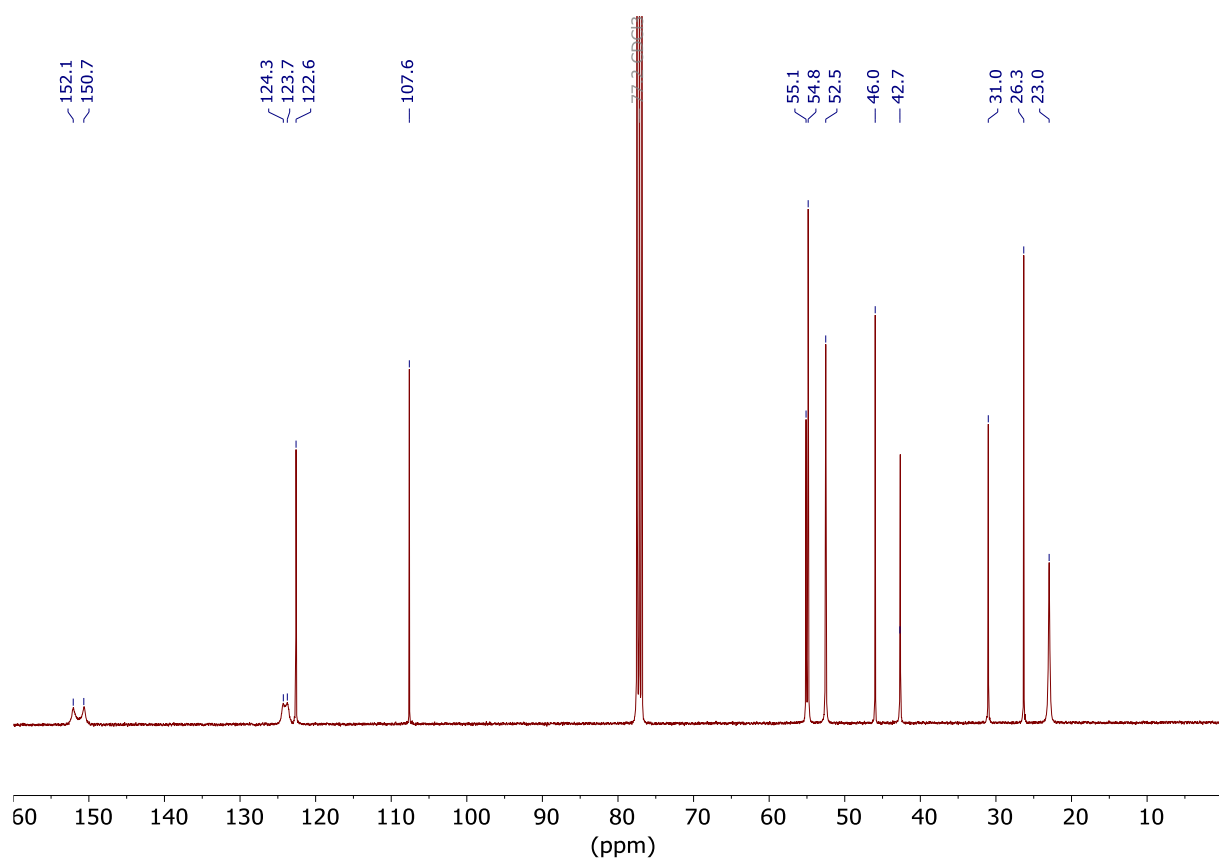

## 2. The xyz coordinates of the optimized structures in CHCl<sub>3</sub>

| Substrate (S) |                    |                   | Transition state (TS) |   |                    | Intermediate state (IS) |                   |   |                    |                   |                    |
|---------------|--------------------|-------------------|-----------------------|---|--------------------|-------------------------|-------------------|---|--------------------|-------------------|--------------------|
|               |                    |                   | 1                     |   |                    |                         |                   |   |                    |                   |                    |
| C             | -0.76121095295846  | -2.12604270645567 | -2.47339497835997     | C | -0.687309000       | -2.390332000            | -2.350802000      | C | 0.06314321156344   | -2.2296851334007  | -2.17162040347232  |
| C             | 0.28542846956428   | -2.0602759326219  | -3.35565007719029     | C | 0.316923000        | -2.642008000            | -2.358021000      | C | 1.23166455134260   | -2.4811867330350  | -2.90807489566449  |
| C             | 0.79252595207197   | -1.42292115135870 | -4.21942955449393     | C | 0.808097000        | -1.739564000            | -4.000837000      | C | 1.73869482607263   | -1.53509705915084 | -3.80673040725766  |
| C             | 0.221159686143487  | -0.14584754520107 | -4.20528266873154     | C | 0.260761000        | -0.487898000            | -4.227967000      | C | 1.07932801010400   | -0.30573679981354 | -3.942300852704789 |
| C             | -0.85113667701354  | 0.15314176630795  | -3.35465421833207     | C | -0.774500000       | -0.078883000            | -3.364463000      | C | -0.08084138404623  | -0.0257860187373  | -3.22176649725356  |
| C             | -1.28735286148905  | -0.845921060187   | -2.49049282769327     | C | -1.199399000       | -1.015216000            | -2.430970000      | C | -0.5445379758164   | -0.99595962429444 | -2.34196090573154  |
| O             | 0.8338900816375    | -3.65399448743728 | -3.3577720746174      | O | 0.805518000        | -3.931075000            | -3.173521000      | O | 0.91375861798578   | -3.66096187453379 | -2.8110875375665   |
| O             | 0.57760856272843   | 0.77478666038136  | -5.06235704580386     | O | 0.784048000        | 0.411074000             | -5.150288000      | O | 1.6373525199282    | 0.58589973727774  | -4.81459792749729  |
| H             | -2.0953540803203   | -0.61004123595903 | 1.81250532950008      | H | -1.988179000       | -0.733691000            | -1.749243000      | H | -1.44582697673997  | -0.7876809604561  | -1.78579007638458  |
| C             | -1.52447422155408  | 1.51252452879985  | -3.36944597796770     | C | -1.450808000       | -1.276803000            | -3.465966000      | C | -0.83979259784546  | 1.2762146205796   | -3.40458080707277  |
| C             | -0.93874009980605  | 2.42694110778136  | -2.314793487962249    | C | -0.862224000       | -2.270249000            | -2.484453000      | C | -0.34101290913596  | 2.398532053798319 | -2.44798302083849  |
| C             | 0.1815878077836    | 3.25515031948748  | -2.63536370129647     | C | 0.182717000        | -3.137375000            | -2.863093000      | C | 0.58630523344472   | -2.38539080129228 | -2.88337652118101  |
| C             | 0.3237906746058    | 4.0881089674638   | -1.6808227567163      | C | 0.779426000        | -0.419746000            | -1.981948000      | C | 1.0754078991041    | -2.28731021735809 | -2.03804122836456  |
| C             | 0.22371306677321   | 4.09714692617342  | -0.37823749926177     | C | 0.276909000        | -0.479813000            | -0.671369000      | C | 0.59256670276663   | 4.32692539070183  | -0.72323589847507  |
| C             | -0.88049361979753  | 3.3044286376036   | -0.03082254358999     | C | -0.800185000       | -3.282456000            | -0.259835000      | C | -0.32708760680490  | 3.39128659470860  | -0.39128659470860  |
| C             | -1.40818263081743  | 2.47070051668681  | -1.01000506514910     | C | -1.320269000       | -2.382405000            | -1.1802709000     | C | -0.75550998465216  | 2.40770733388490  | -1.12517001360602  |
| O             | 0.627313505044780  | 3.24100372497516  | -5.91299251181360     | O | 0.613197000        | -3.008476000            | -5.173292000      | O | 1.07292226842463   | 3.22617665029173  | -4.17345369693325  |
| H             | -2.3586085754506   | 1.81048019085033  | 0.42725015351033      | H | -2.134580000       | -1.04579000             | -0.860373000      | H | -1.44489280053611  | 1.66253123152661  | -0.76308132152661  |
| C             | -1.46417869813426  | 3.34775895889502  | 1.36875219499172      | C | -1.381350000       | -3.412180000            | -1.135784000      | C | -0.81979328763933  | 3.45330156489274  | 1.1890825091530    |
| C             | -0.80431793840445  | 3.23561837470013  | 2.26889329711618      | C | -0.716288000       | -2.460045000            | -2.108720000      | C | -0.07170961201320  | 2.48491090852714  | 2.08682871386831   |
| C             | 0.2562523982131    | 2.69138389934962  | 3.09734842215202      | C | 0.311103000        | -2.886459000            | -2.949540000      | C | 1.07370270409832   | 2.88173983081355  | 2.78905157093666   |
| C             | 0.89249545329203   | 1.7613226473740   | 3.9279636210760       | C | 0.89249545329203   | 1.7613226473740         | 3.9279636210760   | C | 0.89249545329203   | 1.7613226473740   | 3.9279636210760    |
| C             | 0.34960840285329   | 0.43926614379733  | 3.9357691278810       | C | 0.494617000        | -0.691970000            | -3.920450000      | C | 1.24551945099853   | 0.7060211341255   | 3.80920754034414   |
| C             | -0.05028234229279  | 0.04970268356672  | 3.14183883803713      | C | -0.560386000       | -0.242501000            | -3.121560000      | C | 0.09863916302059   | 0.2762857145222   | 3.12731670789590   |
| C             | -1.21473351462524  | 1.00220282762828  | 1.215355361540803     | C | -1.114763000       | -1.137665000            | -2.217840000      | C | -0.55779109193806  | 1.18793853809397  | 2.26971537118477   |
| O             | 0.6896189013397    | 3.98938213895828  | 3.0793304143300       | O | 0.6896189013397    | 3.98938213895828        | 3.0793304143300   | O | 0.6896189013397    | 3.98938213895828  | 3.0793304143300    |
| O             | 1.09613278357308   | -0.43159829210864 | 4.75879984814598      | O | 1.138064000        | -0.110630000            | 4.809173000       | O | 1.92804403259938   | -0.11273380460244 | 4.6651570608785    |
| H             | -2.0405990234573   | 0.7088655858632   | 1.67537319342255      | H | -1.9247278000      | 0.977423000             | 1.588793000       | H | -1.40275120417570  | 0.87607769939787  | 1.607910091609346  |
| C             | -0.21196862648171  | -1.36315743031539 | 3.19197946099318      | C | -1.109988000       | -1.165101000            | -3.295920000      | C | -0.47006651917362  | -1.1124027419652  | 3.34874066768644   |
| C             | -0.597189340019575 | -1.0493923284616  | 2.04882751419861      | C | -0.597189340019575 | -1.0493923284616        | 2.04882751419861  | C | 0.09030712715615   | -1.07718502516219 | 2.65230674261619   |
| C             | 0.55420443374273   | -2.96886551086604 | 2.36080314198661      | C | 0.55420443374273   | -2.96886551086604       | 2.36080314198661  | C | 1.13899165118902   | -0.9076029204355  | 2.72439362870592   |
| C             | 1.16136524770707   | -3.75455204591524 | 1.38107543727115      | C | 1.16136524770707   | -3.75455204591524       | 1.38107543727115  | C | 1.679296036241859  | -3.90357502813991 | 1.83596030706125   |
| C             | 0.58488538411118   | -3.80862955123552 | 0.10789153431166      | C | 0.58488538411118   | -3.80862955123552       | 0.10789153431166  | C | 1.17516888506236   | -3.9800603125507  | 0.548461839391268  |
| C             | -0.5910519683876   | -3.1011529376529  | -0.1778972863041      | C | -0.5910519683876   | -3.1011529376529        | -0.1778972863041  | C | 0.06930489100290   | -3.15154873911337 | 0.152385284614966  |
| C             | -1.12607353487059  | -2.3043694002038  | 0.8256070819867       | C | -1.12607353487059  | -2.3043694002038        | 0.8256070819867   | C | -0.40030750170569  | -2.2522946827122  | 1.07137011861594   |
| C             | -1.10386308121212  | -2.92096605808012 | 3.6192130155483       | C | -1.10386308121212  | -2.92096605808012       | 3.6192130155483   | C | 0.162417812246752  | -2.61933687030564 | -0.23121292080451  |
| O             | 1.21870630595781   | -4.59105091394061 | -0.8158487968567      | O | 1.21870630595781   | -4.59105091394061       | -0.8158487968567  | O | 1.61179334230694   | -4.88460456230695 | -0.3461095050887   |
| H             | -2.01956200016515  | -1.7393389117569  | 0.60145242673176      | H | -2.01956200016515  | -1.7393389117569        | 0.60145242673176  | H | -1.20047460089260  | -1.58480815506014 | 0.77077941672877   |
| C             | -1.2618067586976   | -3.20195740058528 | 3.0793304143300       | C | -1.2618067586976   | -3.20195740058528       | 3.0793304143300   | C | -0.5180423115124   | -2.2718851547896  | 1.6627871260734    |
| C             | -3.05125528266261  | 1.4211012747665   | -3.2966271496417      | C | -2.977570000       | 1.185140000             | -3.367614000      | C | -2.3630454872694   | 1.123802450989    | -3.3534500549866   |
| C             | -2.9923654512378   | 3.24213719776002  | 1.38200957584727      | C | -2.909415000       | 3.302172000             | 1.154368000       | C | -2.34351457794165  | 3.37174271128599  | 1.2375915362467    |
| H             | -1.2264086268278   | 4.32820596327601  | 1.77388790806059      | H | -1.163139000       | 4.422434000             | 1.470654000       | H | -0.60445835000110  | 4.4555938211198   | 1.5474531488248    |
| C             | -2.7329915256628   | -1.4093923284616  | 2.04882751419861      | C | -2.7329915256628   | -1.4093923284616        | 2.04882751419861  | C | -2.0011264025486   | -1.1506552748562  | 1.6802786654093    |
| H             | -0.88495500869475  | -1.79936238699475 | 4.1357737188607       | H | -0.809909000       | -1.534579000            | -2.326711000      | H | -1.5777702608716   | -1.43545140863894 | 4.33809174606206   |
| C             | -2.79066110474661  | -3.4949808661072  | -1.45656459402189     | C | -2.716329000       | -3.328601000            | -1.244277000      | C | -2.04886822554486  | -3.28581009186605 | -1.2293133844881   |
| H             | -0.9621581186918   | -4.15218144818928 | -1.9676470118396      | H | -0.9621581186918   | -4.15218144818928       | -1.9676470118396  | H | -0.21773670295393  | -4.2423808259323  | -1.0773927286314   |
| C             | -3.70365069494698  | 3.598393740056724 | 4.50392350831683      | C | -3.70365069494698  | 3.598393740056724       | 4.50392350831683  | C | -6.25957423384293  | 3.51271153984293  | 1.6402786654093    |
| H             | -3.3643294139942   | 1.00950918433158  | -2.33719347599428     | H | -3.3643294139942   | 1.00950918433158        | -2.33719347599428 | H | -2.68932606745789  | 0.84418008772410  | -2.3515075855745   |
| H             | -3.4476039159905   | 2.49356403674475  | -3.32796408249845     | H | -3.3643294139942   | 1.00950918433158        | -2.33719347599428 | H | -2.79362763626388  | 2.11161655747021  | -3.5384920205955   |
| H             | -3.38446971805702  | 4.02831910593784  | 0.72065673981828      | H | -3.38446971805702  | 4.02831910593784        | 0.72065673981828  | H | -2.77843546049532  | 4.05930684626276  | 0.60250537920218   |
| C             | -3.32035553727928  | 3.23035984055184  | -2.33719347599428     | C | -3.32035553727928  | 3.23035984055184        | -2.33719347599428 | C | -0.965454315874411 | 3.23035984055184  | -2.33719347599428  |
| C             | -3.63373695115452  | 3.96651134283179  | 2.76025787400410      | C | -3.556041000       | 3.534970000             | -1.571843000      | C | -2.93246165058812  | 3.51170840508167  | -2.37739739757822  |
| C             | -3.39662925871732  | -0.6369708803152  | 4.34066818240896      | C | -3.307258000       | -0.360837000            | 4.346179000       | C | -2.64920337910184  | -0.259876756264   | 4.4432997285533    |
| H             | -3.13619047965627  | -1.04313800211021 | 2.6032572927512       | H | -3.037912000       | -0.901436000            | 2.299041000       | H | -2.4412369270995   | -0.8911272294936  | 2.3179966850953    |
| C             | -1.2645795405511   | -2.45970851509578 | 3.26447333582578      | C | -2.946523000       | -2.250995000            | 3.392169000       | H | -2.29717010035466  | -2.18795129398521 | 3.5670030449420    |
| C             | -3.7277074140596   | -4.357654085275   | -0.58916323373911     | C | -3.034400000       | -4.365560000            | -0.299190000      | C | -2.68246461484526  | -4.365560000      | -0.299190000       |
| H             | -3.1827074921442   | -2.2906485927945  | -1.11051989672080     | H | -3.103969000       | -2.348572000            | -0.967470000      | H | -2.440771679250310 | -2.3252271856798  | -0.89635319152486  |
| H             | -3.36363516362779  | -1.36768863177951 | -2.4772128806035      | H | -3.093629000       | -2.350899000            | -2.252080000      | H | -2.38581961078400  | -3.40389563428162 | -2.26246203376176  |
| H             | -1.30079780674215  | -3.97568312321272 | -4.3282804727841      | H | -1.249115500       | -1.662119000            | -4.461497000      | H | -0.61644163828310  | 1.63789811615250  | -4.40485403821301  |
| C             | 0.29580136407131   | 2.17249691068337  | 4.7290627776082       | C | 0.29580136407131   | 2.17249691068337        | 4.7290627776082   | C | 2.94809627453788   | 2.47787342633578  | 4.7290627776082    |
| C             | 2.4474308473555    | -4.46642378059684 | 1.68770416775589      | C | 2.447122000        | -4.526023000            | 1.940012000       | C | 2.84980360925575   | -4.7764829140987  | 1.7605895400070    |
| C             | 1.294              |                   |                       |   |                    |                         |                   |   |                    |                   |                    |

|                     |                    |                   |                |              |              |                     |                   |                   |
|---------------------|--------------------|-------------------|----------------|--------------|--------------|---------------------|-------------------|-------------------|
| H 1.8822271209314   | -7.0075122384608   | 2.55239884261834  | H 4.4064928000 | -6.332816000 | 3.149380000  | H 4.3767937807475   | -6.9953413283851  | 2.6053496752194   |
| H 3.6215679520138   | 6.6136068753708    | -3.310811873018   | H 1.903628000  | -4.672945000 | -4.662800000 | H 7.1441814940486   | 6.0285157847310   | -6.0285157847310  |
| H 3.9570383489677   | 5.959365275186     | 3.88809091032626  | H 4.024088000  | 5.667154000  | -4.960636000 | H 3.8883326403461   | 5.5177213152333   | -4.5177213152333  |
| H -0.05852972978064 | 6.1555249369301    | -3.1702200179904  | H 1.478161000  | 1.787710000  | -1.081590000 | H -0.04141924615489 | 6.0500793144423   | -3.5706188037366  |
| H 1.2132891439808   | 7.36976737568747   | -2.95820202978057 | H 2.917976000  | 7.491452000  | -2.060796000 | H 0.9048533280155   | 7.4777017543238   | -3.51227891504950 |
| H 0.03015426679951  | 3.2103745954557    | 5.9835001842899   | H 3.394677000  | 2.144388000  | 6.983380000  | H 0.9961853750022   | 2.1657311645264   | 6.195105526191    |
| H 0.82830251958082  | 4.6520268061474    | 6.6189611275667   | H 1.397441000  | 1.397441000  | 0.014776000  | H 1.4752088036777   | 3.229010325987    | 7.42991415799093  |
| H 0.9702586868972   | 4.09702586868972   | 4.0178796852949   | H -0.214377000 | 3.666495000  | 5.569115000  | H 4.3516260154827   | 4.4843782734606   | 5.792942723819    |
| H 3.11566005328402  | 5.11566005328402   | 6.00505481529218  | H 0.325648000  | 4.030897000  | 7.205785000  | H 3.62064615373401  | 4.5322440685146   | 6.929042668140    |
| H 3.21028795711847  | -4.57704212879931  | -6.39441866137373 | H 0.175881000  | -3.742652000 | -7.530925000 | H 1.78632992607332  | -6.0656806944846  | -1.17391141892825 |
| H 0.87018706226516  | -4.3257321295858   | -6.90521412765310 | H 2.151068000  | 2.7710000    | -8.433140000 | H 3.74671182057048  | -2.39681298086153 | -7.801913105671   |
| H 3.75977450420509  | -5.737474770712360 | 4.5165864183135   | H 1.162732000  | 1.714589000  | 3.647329000  | H 1.53487939987545  | -7.8422638766818  | 1.17466108506872  |
| H -1.4820351212751  | -6.4820351212751   | 4.20424524968866  | H 3.175474000  | -7.73260000  | 2.525790000  | H 3.86175715667978  | -7.80151650108955 | 1.11398732012442  |
| H 3.10532989538935  | 6.1547368426272    | -4.94066513785491 | H 1.405488000  | 7.394471000  | -4.665160000 | H 2.84648589255098  | 6.4710234688903   | -5.58091498751053 |
| H 0.80439824812457  | 6.77983204799001   | -4.57897030514219 | H 1.375842000  | 8.262871000  | -2.474880000 | H 0.50223994855239  | 6.72540146596306  | -5.068459837665   |
| H 3.01384305734970  | 3.0449483703033    | 7.0612301122209   | H 3.324588000  | 3.891398000  | 6.686941000  | H 2.50922059100813  | 1.17921287938739  | 7.0011677905472   |
| H 3.69886873422776  | 3.51049105338941   | 6.47451283039415  | H 1.102511000  | 4.827519000  | 5.827258000  | H 4.57171313417350  | 3.11477618413391  | 6.46107751502493  |

2

|                     |                   |                   |                      |                   |                    |                      |                    |                   |
|---------------------|-------------------|-------------------|----------------------|-------------------|--------------------|----------------------|--------------------|-------------------|
| C -0.8128199146946  | -2.08830159953460 | -2.5155004112095  | C -0.59475192161429  | -2.2312024143557  | -2.47052159571769  | C -0.36038119761067  | -2.23180370565481  | -2.08553215254893 |
| C 0.20202102172785  | -2.35539015356081 | -3.41598085425693 | C 0.733736989045621  | -0.85989085128018 | -3.4136043657457   | C 0.75077990339393   | -2.54417455912506  | -2.8840253472627  |
| C 0.17665735093934  | -1.36995461529840 | -4.27674196558186 | C 0.8607018434546    | -1.6573904155744  | -4.34824895979728  | C 1.25241909577641   | -1.6280501777580   | -3.81465216256258 |
| C 0.14771118561030  | -0.0928779272375  | -4.2428295114720  | C 0.32345995501093   | 0.36361944922419  | -4.35172355890821  | C 0.6621684801891    | -0.3611312790587   | -3.9583395966167  |
| C -0.9089278692334  | -0.006929485362   | -3.370692702759   | C -0.6845995492841   | -0.0403101918574  | -3.45183430097347  | C -0.4471159895909   | -0.023031796061786 | -3.1475232021742  |
| C -1.3345910365704  | -0.8073507521394  | -2.50983857345904 | C -0.10875239207126  | -0.93591700123041 | -2.513481826180824 | C -0.90932086184466  | -0.0660546346058   | -2.22123586088194 |
| C 0.0767645099175   | -3.60815823214263 | -3.44321358874532 | C 0.8579831686996    | -0.5934325121642  | -3.3710934283067   | C 1.36808480021399   | -3.7676601709577   | -2.8281471239032  |
| C 0.0669990714842   | -0.3972791291929  | -5.3136611970129  | C 0.8004567561354    | -2.4972456176793  | -5.91146202251272  | C 1.42148243024540   | -3.8074912405450   | -4.8074912405450  |
| C -1.21300974806244 | -0.57457927706550 | -1.8153849927678  | H -1.8480082458563   | -0.65299413135611 | -1.80053740821856  | H -1.767724713123783 | -0.71162309429045  | -1.61798974128880 |
| C -1.57645042613693 | 3.16528667400091  | -3.3563099604891  | C -1.3557336546915   | 3.6543821790000   | -3.51875691592452  | C -1.14486430090255  | 3.13496374891226   | -2.3745702020058  |
| C -0.9774677007845  | 2.45178811237145  | -2.86037748438528 | C -0.7721691590150   | 2.3242368010995   | -2.502707466331    | C -0.5892808959913   | 2.3409372050437    | -2.3190158638388  |
| C 0.121390849923562 | 0.121390849923562 | 3.1399131454714   | C 0.3199131454714    | 3.1399131454714   | 3.1399131454714    | C 3.1399131454714    | 3.1399131454714    | 3.1399131454714   |
| C -0.0744603251644  | 0.40566630432096  | 3.1360609773143   | C 0.90673590851586   | 4.0032146938712   | -1.91996961985081  | C 0.93480659912570   | 2.3304931451701    | -1.88193862155793 |
| C 0.22023737334975  | 3.0613043102597   | -0.32128158531655 | C 0.36936736243996   | 3.0681126780197   | -0.6256898342428   | C 0.4466694180547    | 4.2702962750597    | -0.5777565780451  |
| C -0.909466032807   | 3.30150142557272  | 0.00839469622495  | C -0.750793731687216 | 3.00861154717013  | -0.2639743752760   | C -0.52675680072570  | 3.7876315250727    | -3.8281471239032  |
| C -1.45349540957112 | 0.00839469622495  | -2.43789286959656 | C -1.42439540957112  | 0.00839469622495  | -2.43789286959656  | C -2.43789286959656  | 0.00839469622495   | -2.43789286959656 |
| C 0.6180077583812   | 3.25798039040571  | -3.86418301214612 | C 0.79143259858127   | 3.0225480344246   | -4.12714921531147  | C 0.84853013911106   | 3.1481109875079    | -4.02283266374898 |
| H -0.2301767254424  | 1.87444015004629  | -0.72893885389293 | H -1.2532743730701   | 1.83893653487496  | -0.94276703179360  | H -1.74830759579855  | 1.73180329028490   | -5.758352547993   |
| C -1.49359581434476 | 3.33820162631978  | 1.40742453612053  | C -1.35935808108298  | 3.4316034698120   | 1.11953232409208   | C -1.0121759112063   | 3.46966119610909   | 1.32992326033714  |
| C -0.38983689759524 | 3.2086471727600   | 2.767736569738    | C -0.70445271050724  | 2.483660960772    | 2.1014817382826    | C -0.28833786969020  | 2.27661115795064   | 2.27661115795064  |
| C 0.2161989241782   | 2.669662018959    | 3.142511228516    | C 0.258075108752     | 3.008573508752    | 3.008573508752     | C 0.8596734413801    | 2.9573836973302    | 3.9573836973302   |
| C 0.8599901007570   | 1.730086961335    | 3.9505056032831   | C 0.8581430632165    | 2.08062154217821  | 3.9373321201714    | C 1.46197322682894   | 1.9788253876119    | 3.8526095955427   |
| C 0.41536248236192  | 0.4050569657430   | 3.9438336468538   | C 0.4795410754318    | 0.3702660709430   | 3.9377974005435    | C 0.95705003877691   | 0.6935197172502    | 3.9724967776961   |
| C -0.6641715882577  | 0.01919972752157  | 3.1360478116338   | C -0.5130304879989   | 0.02523957402076  | 3.07471756105199   | C -0.1767824383349   | 0.2682882593430    | 3.2618552728833   |
| C -1.2279751114132  | 0.9802180049729   | 2.30972876399796  | C 1.05193647702593   | 1.1587362132422   | 2.1587362132422    | C -0.5252002817682   | 1.18641417529271   | 2.3947107284907   |
| C -0.6461735644919  | 3.97285893564804  | 3.16747317810437  | C -0.581516503496    | 4.511528977720    | 2.940554128017605  | C 0.13799732820154   | 3.170260849018     | 2.86269835708187  |
| C 0.10699214688019  | -0.4741817583031  | 4.62705367436399  | C 1.106090479182     | 0.9794973732552   | 1.4836698127668    | C 0.161442563196127  | -0.1503046662093   | 4.83679477970048  |
| H -0.20442345910329 | 0.6859378620446   | 1.766201573000342 | H -1.8118206022288   | 0.7808443732553   | 1.4775611527668    | H -1.6400151032140   | 0.8898967623419    | 1.8557357806386   |
| C -1.2123702929811  | 6.16712811814804  | 6.16712811814804  | C -1.08794071759543  | 6.16712811814804  | 6.16712811814804   | C -1.08794071759543  | 6.16712811814804   | 6.16712811814804  |
| C -0.016943064039   | -2.23202260561144 | 2.06175481353580  | C -0.4002167046899   | -2.0647755914530  | 2.11974014636680   | C -0.25419464362979  | -2.1126427610216   | 2.46252352969842  |
| C -0.576212100045   | -2.9576161222838  | 2.9883851893804   | C 0.775169085700     | 2.76554882623542  | 2.3988302623542    | C -0.7970868629064   | -2.9019378252039   | 2.79096868629064  |
| C -0.661717199335   | -3.71764941127380 | 1.29413104532442  | C 1.3943190294941    | -3.5847801158207  | 1.45802276297458   | C 1.3087550341629    | -3.9019157648788   | 1.8845195573009   |
| C -0.5721580430197  | -3.71764941127380 | 1.29413104532442  | C 0.8025235457996    | -3.71764941127380 | 1.29413104532442   | C -0.07219506158417  | -3.9638914502018   | 0.6084519674626   |
| C -1.0191854789145  | -3.082324191729   | -3.2167040874692  | C -0.3938503908428   | -0.11551520692452 | -3.2167040874692   | C -0.3938503908428   | -0.11551520692452  | -3.2167040874692  |
| C -1.1553602505078  | -2.30652614976544 | 0.78857342915297  | C -0.94638255443931  | -2.306426736129   | 0.85774566217302   | C -0.78295321536046  | -2.21215123062204  | 1.1836176274005   |
| C 1.1245566538139   | -2.9240079192749  | 3.5427251253334   | C 1.29401180170249   | -3.5426810320628  | 3.66097791834221   | C 0.13149679828395   | -2.6472788096925   | 4.06770475118601  |
| C 1.20358445864901  | -3.53958326702844 | -0.90935129798226 | C 1.45431265225276   | -3.588691996770   | -0.69901734781299  | C 0.19320857070291   | -8.66293813722316  | -0.3011566052840  |
| C -2.06085807443219 | -1.7548976287030  | 0.5820518680907   | C 1.86374041712392   | -1.7285067476769  | 0.62296542771986   | H -1.59140692620428  | 1.55074711451993   | 0.9072721202946   |
| C -1.3023727488007  | -3.17415778851441 | -1.58066779730870 | C -0.0775606298103   | -4.022132021879   | -4.022132021879    | C -0.95339277015412  | -2.64702342050145  | -1.12915659036717 |
| C -3.10272810506181 | 1.4749854601945   | -3.27736365761345 | C -0.88216230108063  | 1.2622342489922   | -3.4370635292668   | C -0.67240671240416  | 1.21901255902826   | -2.06263471789974 |
| C -0.0221702929811  | 3.24050181964039  | 4.269842364554    | C -2.88564748636712  | 3.3013268082968   | 1.12126017994677   | C -2.5382844116063   | 3.7925972478349    | 1.4321232819087   |
| H -1.2554323034900  | 4.3155158632610   | 1.8197265391961   | C -1.07143171789179  | 4.44413225164622  | 1.438848439997     | C -1.07143171789179  | 4.44413225164622   | 1.438848439997    |
| C -2.74221377601516 | -1.44096615791242 | 3.1893777180560   | C -2.56114862393536  | -1.2355171614381  | 3.15946160887627   | C -2.30977386961020  | -1.09823661875565  | 3.5295192685107   |
| H -0.8867852964505  | -1.84474701399479 | 1.0104548256580   | H -0.7297378647658   | -1.56223468200207 | 4.1348848439997    | H -0.46311709824678  | -1.4542745886968   | 4.491403643295    |
| C -2.8301937890993  | -3.22256974244711 | -1.49295702487380 | C -2.606382680736    | -3.28904717807816 | -1.3679928757017   | C -2.8389614977439   | -3.2208132669189   | -1.0268059687508  |
| H -1.0024411817467  | -2.491464860282   | 3.2380480403691   | C -1.7845565626904   | -2.491464860282   | 3.2380480403691    | C -1.7845565626904   | -2.491464860282    | 3.2380480403691   |
| C -3.16737672044121 | -3.22256974244711 | -3.9673960632003  | C -3.5268214279876   | -3.9677176552004  | -4.51870008770274  | C -3.3100500514654   | -2.0215759087416   | -1.9191529068903  |
| H -3.991632287312   | 1.0460849175895   | -2.32430992535124 | H -3.18543541423217  | 0.8735501050174   | -2.46540851190912  | H -2.99955133465364  | 0.95580529105497   | -2.3020176150645  |
| H -3.49768789762816 | 4.0494366615405   | -2.38847452254766 | H -3.38537387225524  | 2.7751040977101   | -4.05496814712471  | H -3.06888977471023  | 0.958024067252     | -3.9200154142329  |
| C -1.4185854703088  | 4.0203130958447   | 0.77245611438661  | H -1.386742049118005 | 4.0203130958447   | 0.406472573172496  | H -2.9584872401689   | 4.1419263840620    | 1.7147642669798   |
| H -3.3497686952858  | 2.294427379027820 | 0.09793797088567  | H -3.128759379278260 | 2.320143258806155 | 0.57522187873166   | H -2.89281359595626  | 3.21475810871336   | 1.05883080491351  |
| C -1.9754541528575  | 2.810041107828147 | 2.810041107828147 | C -2.58441107828147  | 2.810041107828147 | 2.810041107828147  | C -2.58441107828147  | 2.810041107828147  | 2.810041107828147 |
| C -3.3986782610970  | 0.681212929790    | 4.3394074263660   | C -3.2476786218047   | -0.4513398971452  | 4.2608696202517    | C -2.90696092352972  | -0.47982405042     | 4.6063274969774   |
| H -1.1592765136782  | 1.60631898145493  | 2.25323912842043  | H -1.29553320620601  | -0.91129876342467 | 2.26039598120730   | H -1.723151415670209 | 3.6618459082871    | 2.66848540807217  |
| H -0.30970779903186 | -2.914464860282   | 3.2380480403691   | H -0.840479538524    | -2.2862474176090  | 3.23804806271532   | H -2.68389002012617  | -2.1264684009819   | 3.70248250735770  |
| H -2.2672710673591  | -2.2672710673591  | -2.2672710673591  | C -1.4314717685949   | -0.4212999767649  | 3.2380480403691    | C -1.4314717685949   | -0.4212999767649   | 3.2380480403691   |
| H -2.2666656109349  | -2.2724829202898  | -1.3488071234234  | H -2.2666656109349   | -2.2724829202898  | -1.3488071234234   | H -2.2666656109349   | -2.2724829202898   | -1.3488071234234  |
| H -2.1015135869525  | -2.33417065746518 | -2.51194213053288 | H -1.24822624004584  | -3.7762907323652  | -2.73742262740781  | H -2.83332945406939  | -3.5262660607672   | -2.1307043515140  |
| H -3.5506678793283  | 2.0345752726018   | -4.30658180434737 | H -1.4982660257807   | 1.7819129524035   | -4.09931710918241  | H -0.92105488710388  | 1.6824074647428    | -2.3678508528402  |
| H -2.5454358435818  | -2.5454358435818  | -2.5454358435818  | C 1.86099785656469   | 3.4983183171660   | 3.4983183171660    | C 1.86099785656469   | 3.4983183171660    | 3.4983183171660   |
| C -1.20412897673825 | -4.029817466588   | 1.5853362984575   | C 1.6564509540685    | 3.5263219242301   | 1.7103625596478    | C 2.4781667204010    | -4.7925325601920   | 2.2035690341539   |
| C 1.2246153645288   | 4.1043271342396   | 3.91546242156548  | C 1.2954490968685    | 3.5496211379054   | -4.230732651368427 | C 1.1395495676084    | 4.0915613658427    | -4.2049591622000  |
| H -1.1841063428064  | 1.05929134573885  | 4.04969211231901  | H 1.11870530360618   | 4.499025454316910 | 3.53095243169110   | H 1.1429749875714    | 4.1578896960227    | 6.0054679944021   |
| H 1.03742386988718  | 1.03742386988718  | 1.03742386988718  | C 1.12805810720260   | 4.4984827165399   | 3.53095243169110   | C 1.1429749875714    | 4.1578896960227    | 6.0054679944021   |
| H 1.0681735177555   | 4.094794172687    | 6.8566667878001   | C 1.12805810720260   | 4.4984827165399   | 3.53095243169110   | C 1.1429749875714    | 4.1578896960227    | 6                 |

|   |                   |                   |                    |   |                    |                    |                    |   |                   |                    |                    |
|---|-------------------|-------------------|--------------------|---|--------------------|--------------------|--------------------|---|-------------------|--------------------|--------------------|
| H | -1.5455226441318  | -2.8572740788952  | -6.2004055249129   | H | 3.1757996299861    | -3.254356256421706 | -7.01372811865248  | H | 3.5181960034863   | -1.14513534279464  | -6.94507034768475  |
| C | 0.953178460673924 | -1.7846780794721  | -0.0128958679092   | C | 2.81639669878454   | -5.0794262234507   | -6.0707227476528   | C | 4.281018682947924 | -3.14968269156750  | -6.01033825156750  |
| H | 4.38904162176091  | -3.5664874999753  | 3.3038017685285    | H | 0.84886801822495   | -5.36891042525100  | 3.23896266312151   | H | 0.24626336601235  | -2.6700212948335   | -6.2889150347639   |
| H | 4.32840742927623  | -6.1232748800996  | 2.73744603590997   | H | 2.33893239283052   | -5.58932628270726  | 4.13287599639918   | H | 1.60186018043461  | -7.1591706363200   | 3.2743540489631    |
| H | 0.56709517001481  | -5.77788313264045 | 2.69790146005846   | H | 4.04800291940023   | -6.2808994247300   | 0.83678893312155   | H | 4.25422448607127  | -6.12877996041215  | -8.00797185158449  |
| C | 1.908943621923470 | -7.4006735085312  | 2.28320431060701   | C | 4.80402695807393   | -6.28102943266928  | 2.848013353956958  | C | 4.36005663501274  | -7.21330823245652  | 2.6608454239923    |
| H | 3.72190027994343  | -6.4762576029515  | -1.22935346796220  | H | 1.4891201373117    | -6.0195345743781   | -4.65759415420828  | H | 3.41738179087803  | 6.88519537535657   | -1.8854806542009   |
| H | 3.82440992128288  | 4.81785140707367  | -3.78070980994446  | H | 0.09115566853852   | 5.69979706289677   | -3.64931726726631  | H | 3.78348317125279  | -4.7577664521924   | -2.762757728425    |
| H | -0.19187588102092 | 6.08769048457491  | -3.00371737238579  | H | 3.3700674345856    | 6.2805428240832    | -1.52145952523652  | H | -0.19847167902082 | 5.90313769838568   | -3.44005801439327  |
| C | 1.27344957413526  | 7.07709173104010  | -2.6759887631666   | C | 3.96756752560514   | 6.94932845599191   | -3.58577000560934  | C | 0.79682315653787  | 7.80729637556947   | -3.32471706550324  |
| H | -0.1237315464016  | 3.03374043566529  | 5.92179017009414   | H | 1.92759507515194   | 1.92840129079318   | 7.2156150021929    | H | 3.9875927974366   | 7.8080815260323    | 6.854295965043     |
| H | 0.49851132058303  | 4.49855746193965  | 6.6289793528918    | H | 1.82818347027676   | 2.67633126314832   | 8.2727960207735    | H | 3.0160944475195   | 2.80874665811961   | 7.97974008513256   |
| H | 3.74578402128319  | 4.0878603207221   | 4.96341063715837   | H | -0.39831506753264  | 3.65581180277484   | 5.49813199214529   | H | 1.4612015766633   | 5.49521306753289   | 5.45421049657907   |
| C | 2.9260893707639   | 5.50715741727347  | 6.33443211090327   | C | -0.4284194934269   | 3.9636983096564    | 7.59996445237129   | C | -0.1230465154679  | 3.34448673693685   | 6.32638980840550   |
| C | 3.16927402610362  | -4.98414553765615 | -6.52060972980221  | C | -0.69614366501029  | -2.23372985985785  | -7.28098088634810  | C | -0.24511240026601 | -3.3608822991202   | -6.14377142429151  |
| H | 0.10604607295251  | -2.9653717129519  | -8.81571683983743  | H | 2.2640512004888    | -4.1295770948382   | -7.9197877674584   | H | 2.7367078086260   | -2.27171369941213  | -8.02762601824949  |
| C | 3.89553308954244  | -5.76354052174896 | 4.83236697399792   | C | 1.3756599865141    | -7.716637102078    | 3.5226723164216    | C | 0.9334373308878   | -8.17645251494528  | 1.49334923499585   |
| H | 1.41391307242578  | -6.36579259349418 | 4.10192165113154   | H | 4.1535647079408    | -7.5808482546174   | 1.86007259751936   | H | 3.45043040119692  | -7.60767424970483  | 0.76885798015513   |
| C | 3.20084320298195  | 6.18470453566529  | -5.29875705691791  | C | 0.42541091087099   | 7.6841401283125    | -4.0211254300976   | C | 2.88414014569462  | 6.2959363850102    | -5.8846911217604   |
| H | 0.73906798466407  | 6.6913672026093   | -4.45532455215495  | H | 2.55368407658898   | 8.15639008814994   | -2.51430575326222  | H | 0.40101363209556  | 6.4795465942014    | -4.97106192579038  |
| C | 1.0066437095262   | 2.71016109263078  | 7.68193727248183   | C | 3.2351126262221    | 4.05842921247241   | 7.2884703323461    | C | 4.41633897970233  | 3.90616703020827   | 6.6843066210174    |
| H | 3.56395982725358  | 3.4667871831249   | 6.5901402645568    | H | 0.78166860431000   | -4.1157368585007   | 6.03658632006299   | H | 1.57333380362836  | 4.27383806581195   | 7.21611217111126   |
| H | 1.07835260135158  | -5.205620062222   | -4.255656808712264 | H | 3.2026969977324    | -4.832617552360936 | -5.08661614150333  | H | 4.7666566974936   | -3.20275805262823  | -5.835524529912191 |
| H | 0.72749508064397  | -2.71069508064397 | -8.63331666516029  | H | 5.5671285148318    | -7.505910485797    | -4.55654388925832  | H | 5.037457585818212 | -3.9015784182112   | -7.5927556040040   |
| H | 1.8123494588218   | -2.93721302102683 | -8.55067137240606  | H | 1.91086350845762   | -5.6697002102510   | -5.95629899519060  | H | 3.9376987193266   | -4.1817068245680   | -6.88481776945702  |
| H | 2.6075664714921   | -7.83441954148405 | 2.64165872233089   | H | 4.49946323034758   | -6.7324947531385   | 3.86556674660673   | H | 3.79249766066131  | -7.9357795327707   | -3.24973107175787  |
| H | 2.00759404929887  | -7.21869433187972 | 1.21488973517419   | H | 5.1406253508173    | -5.2544464678065   | 2.83382854815413   | H | 4.58081549536894  | -6.59529870169648  | 3.29887411693983   |
| H | 1.1269555374408   | -8.14607780562402 | 2.6102108206478    | H | 5.66176915898923   | -6.6587931749982   | 7.47891658992363   | H | 5.39824359632643  | -6.78916359632643  | 7.47891658992363   |
| H | 2.16729758790921  | 8.23577521522952  | -3.08504009189548  | H | 3.5646602110177    | 7.12502137631419   | -4.57297095627798  | H | 1.588183742937028 | -3.8818742937028   | -1.8114422634485   |
| H | 1.435229742748793 | 7.6078019539547   | -1.61163672602532  | H | 4.392904960418085  | 5.4907960078841    | -3.58197884322074  | H | 1.0052236961034   | 7.74559896361253   | -2.2562778689072   |
| H | 0.805528899770038 | 8.48283687781963  | -2.7798008692958   | H | 4.78410605524785   | 7.6525120969111    | -3.43208996992584  | H | -0.13214142901131 | 8.35290470466333   | -3.46013710307984  |
| H | 2.387426742238238 | 5.584766254185358 | 7.2706794185536    | H | 2.040496615388785  | 8.41334782898383   | 2.64401445623898   | H | -0.2190753408396  | 2.77601145623898   | 2.64401445623898   |
| H | 2.39812662066613  | 6.12479873680956  | 5.60883709025455   | H | -0.8559970918145   | 3.712777096544     | 7.88899616417172   | H | -0.43404866459813 | 2.86322476528187   | 5.40404331060019   |
| H | 3.90950617911365  | 5.9445553142665   | 6.49774728272345   | H | -1.24280080380428  | 4.6060780011253    | 7.49090754212846   | H | -0.77127732632181 | 4.20720090941771   | 6.4909090973810    |
| H | 2.62102080614382  | -5.17463453642977 | -7.44082644106873  | H | -0.27446540186389  | -1.99897219192522  | -8.25663152902492  | H | -0.6009224671151  | 6.0077382344398    | -6.90273418623898  |
| H | 2.73977648365851  | -5.60283782813267 | -4.255656808712264 | H | 2.73977648365851   | -5.60283782813267  | -4.255656808712264 | H | -0.55337835421761 | -2.95337835421761  | -4.255656808712264 |
| H | 4.19606013152343  | 3.4068142242765   | -6.6808362030877   | H | -0.27446540186389  | -1.99897219192522  | -8.25663152902492  | H | -0.55337835421761 | -2.95337835421761  | -4.255656808712264 |
| H | 3.4811270364772   | -6.76115499616023 | 4.96051563737710   | H | 2.2409949504908    | -8.0456427203716   | 3.70535311375325   | H | 1.7307915500479   | -9.0166525053629   | 1.50468468087377   |
| H | 3.35720324746958  | -5.08249637343220 | 5.4905240400846    | H | 0.82950099394320   | -8.78157195712837  | 2.67180770889700   | H | 0.68992099660456  | -7.94966307211670  | -0.640477964759    |
| H | 4.93533308595848  | -5.79758110217708 | 5.15898025661227   | H | 0.73357031294253   | -7.47560507818837  | 4.39994514347556   | H | 0.05792440727317  | -8.63307010392620  | 1.9514181084685    |
| H | 2.7912257902447   | 7.16269491780247  | -4.412396696912958 | H | 1.11284677880292   | -2.577428677880292 | -4.25916499542269  | H | 1.11284677880292  | -2.577428677880292 | -4.25916499542269  |
| H | 2.5671479487102   | 5.47396125118051  | -4.472396696912958 | H | -0.08346125076634  | 5.76572858777001   | -3.13953344739736  | H | 2.45372022051018  | 5.47396125118051   | -4.472396696912958 |
| H | 1.8995890646033   | 6.25880879476188  | -5.67458212057474  | H | -0.28779853516781  | 7.75165051936615   | -4.84399707699926  | H | 3.85844869826233  | 6.50285649039741   | -6.31756834777501  |
| H | 4.119985390414799 | 3.14492816431144  | 8.223653502331213  | H | 2.67085013847435   | -4.9791580928829   | 7.42713094760863   | H | 3.91979702665430  | 4.8716792916495    | 6.77569598214868   |
| H | 1.23846607719213  | 1.66136525352473  | 7.49414920081253   | H | 3.7983786575917914 | 6.3257388117639    | 1.984780464727913  | H | 4.8716792916495   | 6.77569598214868   | 6.77569598214868   |
| H | 0.91930666668620  | 2.74617045998157  | 8.33783453100888   | H | 3.95939536809137   | 3.9843475282941    | 8.09978265251284   | H | 5.23122813993605  | 3.88317879643396   | 7.40841294041337   |

3

|   |                    |                    |                    |   |              |              |                |   |              |              |              |
|---|--------------------|--------------------|--------------------|---|--------------|--------------|----------------|---|--------------|--------------|--------------|
| C | -0.76957974992748  | -2.08301393626082  | -2.55753835740033  | C | -0.509534000 | -2.347401000 | -2.337371000   | C | -0.246761000 | -2.210986000 | -2.084317000 |
| C | 0.25266521126233   | -2.34740236769502  | -3.47110947389411  | C | 0.435717000  | -2.347402300 | -3.284720000   | C | 0.884612000  | -2.502620000 | -2.861569000 |
| C | 0.75028173610406   | -1.35488497161934  | -4.32521182017851  | C | 0.894958000  | -1.884437000 | -4.280770000   | C | 1.379895000  | -1.581129000 | -3.708460000 |
| C | 0.204159852787863  | -2.560587608712264 | -4.255656808712264 | C | 0.418225000  | -1.856549000 | -4.28738181000 | C | 0.772241000  | -1.023440000 | -3.380250000 |
| C | -0.850260602152    | -3.37914699727508  | -3.384467000       | C | -0.561862000 | -1.015737000 | -3.384467000   | C | 0.573790000  | -0.037460000 | -3.138213000 |
| C | -1.28226575796272  | -0.79508708504333  | -2.53241156023940  | C | -0.979532000 | -1.046882000 | -4.217223000   | C | -0.818827000 | -0.958452000 | -2.234208000 |
| O | 0.78861835667410   | -3.6049471129258   | -3.51774878324429  | O | 0.883861000  | -4.048573000 | -3.188668000   | O | 1.520745000  | -3.711441000 | -2.785183000 |
| O | 4.74185372620421   | -3.82736593698258  | -5.08838759805449  | O | 0.925462000  | 0.261674000  | -5.246802000   | O | 1.319649000  | 0.549395000  | -4.786704000 |
| H | -0.074639104159616 | 1.83129188967610   | -4.127396696912958 | H | -1.725483000 | -0.704923000 | -4.709439000   | H | -1.725483000 | -0.704923000 | -4.709439000 |
| C | -1.51497074987102  | 1.58246604989145   | -3.35339800489304  | C | -1.212112000 | 1.223842000  | -5.469650000   | C | -1.082636000 | 1.314164000  | -3.298331000 |
| C | -0.92369719014846  | 2.4594638131141    | -2.270635338295758 | C | -0.636320000 | 1.291967000  | -2.492720000   | C | -0.562237000 | 2.355417000  | -2.332098000 |
| H | 0.1795665886765    | 3.26426520276328   | -2.55769409417518  | C | 0.489856000  | 2.939655000  | -2.813199000   | C | 0.405864000  | 3.232732000  | -2.752310000 |
| C | 0.7902341235272    | 4.05164379878508   | -1.57531599159505  | C | 0.076260000  | 3.945282000  | -1.907141000   | C | 0.916952000  | 4.250650000  | -1.891535000 |
| C | 0.26217722334363   | 4.05395249774893   | -0.28125351466431  | C | 0.506401000  | 3.958430000  | -0.630431000   | C | 0.417043000  | 4.308363000  | -0.591784000 |
| C | -0.86914999831672  | 3.28531402757495   | 0.0335632409292    | C | -0.646217000 | 3.243555000  | -0.280834000   | C | -0.538992000 | 3.403141000  | -1.021555000 |
| C | -2.408149309706    | 2.4887350015759    | -0.97041855600426  | C | -1.1710290   |              |                |   |              |              |              |

|   |                    |                     |                        |   |                   |                    |                   |   |                  |                    |                   |
|---|--------------------|---------------------|------------------------|---|-------------------|--------------------|-------------------|---|------------------|--------------------|-------------------|
| H | -3.8148998244428   | 4.7062766903485     | 4.47479385625984       | H | -3.7578989000     | 5.138714000        | 3.862619000       | H | -3.274447000     | 5.067046000        | 4.344680000       |
| H | -5.19792607090201  | -2.28515598752502   | 3.24646907090201       | H | -5.055871000      | -1.053294000       | 1.571997000       | H | -4.820681000     | -1.040480000       | 3.463811000       |
| H | -5.19583645426381  | -1.8601695426381    | 4.29824490340936       | H | -5.088124000      | -1.14661000        | 4.345800000       | H | -4.825993000     | 5.167491000        | 4.677910000       |
| H | -5.34170697749743  | -0.24681066840663   | 4.99074634518660       | H | -5.255562000      | 0.238622000        | 4.867223000       | H | -4.950031000     | 0.369652000        | 5.172407000       |
| H | -3.06776166604283  | -2.31177467963908   | 5.797836460044173      | H | -3.004335000      | -1.752853000       | 5.931504000       | H | -2.679732000     | -1.63934000        | 6.188234000       |
| H | -1.80234224610307  | -1.08589686434183   | 5.83152740279540       | H | -1.752749000      | -0.511825000       | 5.912471000       | H | -1.420477000     | -0.409296000       | 6.099934000       |
| H | -3.39020084953547  | -0.72294908743547   | 6.48798349999126       | H | -3.367855000      | -0.403303000       | 6.472301000       | H | -3.367855000     | 6.710623000        | 6.170623000       |
| H | -5.22560867163846  | -0.336058467163846  | -0.03368908185753      | H | -5.014056000      | -3.277665000       | -0.084800000      | H | -4.878906000     | -0.212864000       | -0.999318000      |
| H | -5.27319233872866  | -4.4483641293569    | -1.66998578636511      | H | -5.036917000      | -4.550436000       | -1.302432000      | H | -4.872829000     | -4.174116000       | -1.379182000      |
| H | -5.30377027086495  | -5.03111841374552   | -0.00829715234787      | H | -5.118450000      | -4.969779000       | 0.007166000       | H | -5.019006000     | -4.925253000       | 0.300766000       |
| H | -3.11197081330637  | -5.9054651330637    | -2.1556271338723       | H | -3.187450000      | -4.35019000        | -1.577474000      | H | -2.772325000     | -5.939658000       | -1.673138000      |
| H | -1.79437337382225  | -5.83493087233151   | -0.98724205681858      | H | -1.595626000      | -5.897587000       | -0.378984000      | H | -1.482537000     | -5.855671000       | -0.429390000      |
| H | -3.34761266587443  | -6.50578848110885   | -0.51595698581343      | H | -3.107729000      | -6.489777000       | 0.105747000       | H | -3.079990000     | -6.46449000        | -0.029003000      |
| H | -5.43892704872967  | 0.01662630216210    | -3.24460850037005      | H | -5.134523000      | -0.160274000       | -3.277637000      | H | -5.002845000     | -0.104313000       | -3.066344000      |
| H | -5.64290015581545  | 1.61892466388041    | -4.25396602310596      | H | -5.330200000      | 1.11129000         | -4.04365000       | H | -5.168490000     | 1.108990000        | -4.33085000       |
| H | -5.66996969874753  | 0.016957817778      | -4.98336384959569      | H | -5.345683000      | -0.53580000        | -0.986766000      | H | -5.163344000     | -0.60258000        | -4.746212000      |
| H | -3.66787638745577  | 2.30364170046680    | -5.87656011001929      | H | -3.326973000      | 1.64072000         | -6.114149000      | H | -3.122879000     | 1.514033000        | -5.96636000       |
| H | -2.29057111697275  | 1.21362619972872    | -6.01485521946255      | H | -1.957448000      | 0.50338000         | -6.116446000      | H | -1.749226000     | 0.414742000        | -5.851427000      |
| H | -3.87164500134143  | 0.70104405572040    | -6.57942517912235      | H | -3.157564000      | -0.039902000       | -6.628984000      | H | -3.310612000     | -0.189968000       | -6.375475000      |
| H | 3.12368007522305   | -3.49071387098730   | -6.2062753378488       | H | 0.039894000       | -3.59020500        | -6.56592000       | H | 1.132345000      | -3.402888000       | -6.134303000      |
| C | 0.69918055119801   | -2.209375500194233  | -6.71232922802228      | C | 1.968106000       | -2.683512000       | -7.786932000      | C | 3.149579000      | -2.332894000       | -7.020144000      |
| C | 3.87211829217108   | -5.37611363262036   | 3.30436076644584       | C | 1.713280000       | -5.93736000        | 3.417707000       | C | 1.297293000      | -6.877222000       | 2.261457000       |
| C | 1.55584023004531   | -6.17397197733520   | 2.93245757928523       | C | 3.651448000       | -6.453264000       | 2.082117000       | C | 3.663794000      | -6.799416000       | 5.121939000       |
| C | 3.26843711783847   | -5.78109512639057   | -3.7807135257246       | C | 1.228813000       | 6.154902000        | -3.817770000      | C | 2.954657000      | 6.153012000        | -4.410787000      |
| C | 0.94050781345770   | 6.49973623743470    | -3.32625881506186      | C | 3.153666000       | 6.913772000        | -2.484457000      | C | 0.532531000      | 6.460653000        | -3.872884000      |
| C | 3.70087291744578   | 3.36085587791746    | 6.42979662077328       | C | 2.090233000       | 3.004606000        | 7.435205000       | C | 3.430486000      | 2.635793000        | 6.938123000       |
| C | 3.38471946571741   | 0.03585401151957    | 5.93983437231070       | C | 0.117947000       | 3.946488000        | 6.265556000       | C | 4.175681000      | 3.929629000        | 6.244164000       |
| C | 3.82846519551609   | -3.36537495116035   | -5.44466756460800      | C | 2.801842000       | -3.36529000        | -8.812177000      | C | 3.216565000      | -4.112007000       | -6.68080000       |
| C | 3.047463765309473  | -2.84765806394373   | -0.718319707598450     | H | 0.017727000       | -4.123013000       | -7.751740000      | H | 1.327909000      | -3.948326000       | -7.059218000      |
| C | -0.20849159569028  | -2.96855116714042   | -6.15992343739998      | H | 2.569412000       | -4.712796000       | -7.837649000      | H | 3.659025000      | -1.365216000       | -7.011626000      |
| C | 3.17790373995957   | -2.38935301284724   | -8.00888518126652      | C | 2.898361000       | -3.89447000        | -7.826852000      | C | 4.186992000      | -3.643142000       | -6.81423000       |
| H | 4.44580849041101   | -4.460321750808091  | 2.341004650505000      | C | 2.341004650505000 | -4.460321750808091 | 2.341004650505000 | C | 4.44580849041101 | -4.460321750808091 | 2.341004650505000 |
| H | 4.35891742699128   | -6.08823969863531   | 2.62681218734648       | H | 2.295649000       | -5.65636000        | 4.360577000       | H | 1.546428000      | -7.137351000       | 3.296246000       |
| H | 0.59670017235587   | -5.78673953744877   | 2.58998393418077       | H | 4.046012000       | -6.341076000       | 1.084017000       | H | 4.332547000      | -6.131227000       | 0.968498000       |
| C | 1.89568498495127   | -7.43360494907727   | 2.14934901475826       | C | 4.770809000       | -6.360792000       | 3.104577000       | C | 4.332474000      | -7.205672000       | 2.806292000       |
| C | 3.7562813621878724 | -3.7562813621878724 | 3.13694545813621878724 | H | 1.801738000       | -5.999661000       | -6.429395000      | C | 2.928730000      | -6.545175000       | 3.869919000       |
| C | 3.8775713339805    | -3.8775713339805    | -3.72944140023110      | C | 0.589977000       | 5.808512000        | -3.719915000      | C | 3.710104000      | 3.92790000         | -4.31201000       |
| H | 0.01340578918223   | 6.08464725954176    | -2.93168788467096      | H | 3.572499000       | 6.780017000        | -1.484833000      | H | -0.283356000     | 5.914260000        | -3.401187000      |
| C | 1.26935319578099   | 7.78813951092018    | -2.58724000324138      | C | 4.260719000       | 6.71328000         | -3.516874000      | C | 0.631273000      | 7.784754000        | -3.255427000      |
| H | -0.1569360409576   | 2.92909229295570    | 5.91518894324425       | H | -0.1569360409576  | 2.92909229295570   | 5.91518894324425  | H | 3.8486876000     | 1.626758000        | 6.648103000       |
| H | 0.4230010898575    | 4.38310720943528    | 6.6805517546007        | H | 0.4230010898575   | 4.38310720943528   | 6.6805517546007   | H | 0.4230010898575  | 4.38310720943528   | 6.6805517546007   |
| C | 1.3529262763402    | -0.61336429346752   | 5.09532642449103       | H | -0.547112000      | 3.683573000        | 5.444357000       | H | 1.750520000      | 4.698490000        | 5.099118000       |
| C | 2.85215497806171   | -5.44499039761879   | 6.46773796548356       | C | -0.719267000      | 4.009377000        | 7.522250000       | C | -0.032901000     | 3.708822000        | 6.200959000       |
| C | 1.35249075201129   | -5.93919568415830   | -6.7177340894665       | C | -1.354122000      | -3.036139000       | -6.998720000      | C | -0.339620000     | -3.085522000       | -6.123140000      |
| H | 0.64239289942629   | -5.45946216040429   | -6.54964216040429      | H | 0.64239289942629  | -5.45946216040429  | -6.54964216040429 | H | 2.171821000      | -2.441311000       | -0.80180000       |
| C | 3.93386237344326   | -5.8955529756317    | 4.72750374437091       | C | 1.211183000       | -7.594199000       | 3.658654000       | C | 0.925700000      | -8.121793000       | 1.480977000       |
| C | 1.42562095212350   | -6.42603677610840   | 3.98492379498028       | H | 3.349011000       | -7.591269000       | 2.075831000       | H | 3.500932000      | -7.659738000       | 0.865731000       |
| C | 3.2969502232624    | 6.27679904026116    | -5.2148362324936       | C | 0.741295000       | 7.555483000        | -4.137062000      | C | 2.754620000      | 6.484159000        | -5.878580000      |
| H | 0.75402510191651   | -3.7769262935151    | -3.7769262935151       | H | 0.75402510191651  | -3.7769262935151   | -3.7769262935151  | H | 0.272826000      | 6.545157000        | 7.920820000       |
| C | 0.93636767632865   | -2.57708200126114   | 7.7054450524826        | C | 2.942856000       | -4.20369000        | 7.602306000       | C | 4.549348000      | 3.652114000        | 6.713072000       |
| H | 3.5067551680749    | 3.4085051821038     | 6.70595842488352       | H | 0.550319000       | -4.92738000        | 6.003542000       | H | 1.722972000      | 4.342894000        | 7.223710000       |
| H | 0.84641579626097   | -0.0448010868440    | -8.84218860347160      | H | 3.570541000       | -3.857701000       | -6.967242000      | H | 4.684374000      | -3.300580000       | -5.851117000      |
| H | 2.76461863578802   | -2.76461863578802   | -0.0448010868440       | C | 3.716477000       | -3.935331000       | -6.967242000      | H | 5.224759000      | -3.451304000       | -7.922397000      |
| C | -0.10293417542629  | -1.18946510515990   | -8.01243646455742      | C | 3.9021000         | -4.850181000       | -7.738371000      | H | 6.883366000      | -4.038696000       | -7.738371000      |
| C | 0.79048729160253   | -8.46951107340786   | 2.27357377458836       | H | 4.400532000       | -6.59759000        | 4.104156000       | H | 3.677708000      | -7.939705000       | 3.373438000       |
| H | 2.84341602034316   | -7.85704393363739   | 2.50970826969490       | H | 5.085295000       | -5.315681000       | 3.127732000       | H | 4.486702000      | -6.939619000       | -6.403252000      |
| H | 0.70461418773007   | -7.18914675571100   | 1.09763262165467       | C | 5.965132000       | -7.244564000       | 2.789595000       | C | 5.664550000      | -7.92796000        | 2.526613000       |
| H | 0.128411669645781  | 3.78646985771331    | 2.69265875400077       | H | 859121000         | -4.850181000       | -4.850181000      | H | 4.122788000      | 8.419189000        | -4.122788000      |
| H | 2.17937058849905   | 8.23168727396368    | -2.99444833011829      | H | 4.632939000       | 5.688435000        | -3.470146000      | H | 0.905414000      | 7.769879000        | -2.022240000      |
| H | 1.4704641691387    | 7.57517198520835    | -1.53687418587317      | C | 5.409882000       | 7.682335000        | -3.295246000      | C | -0.685561000     | 8.596565000        | -3.377876000      |
| C | 2.25460928719902   | 5.43334014441403    | 7.37991338775223       | H | -0.114169000      | 4.482919000        | 8.314166000       | C | -0.543593000     | 2.803358000        | 7.305648000       |
| H | 2.9150369312405    | -0.0860175790635    | 7.3420210930819        | H | -1.05994000       | 4.482919000        | 8.314166000       | H | 2.9150369312405  | -0.0860175790635   | 7.3420210930819   |
| C | 1.84549028719902   | 5.43334014441403    | 7.37991338775223       | C | -1.912545000      | 5.005156000        | 2.799883000       | H | -0.511032000     | 6.869660000        | -6.274026000      |
| H | 2.54803009698024   | -5.06429340388833   | -7.62108758094803      | H | -1.632680000      | -2.389862000       | -5.143716000      | H | -0.541762000     | -2.398370000       | -7.006321000      |
| H | 2.6816342884941    | -5.55890010253715   | -5.5467340863190       | H | -1.331022000      | -2.400163000       | -5.181892000      | H | -0.540637000     | -2.376087000       | -5.261407000      |
| C | 4.562605721787843  | -5.787853778537843  | 5.987490778537843      | H | 4.562605721787843 | -5.787853778537843 | 5.987490778537843 | H | 2.857312000      | -2.128898000       | -6.905808000      |
| H | 3.45489998176752   | -6.87264115848003   | 4.79400320576520       | H | 2.051112000       | -8.044682000       | 3.785870000       | H | 1.738346000      | -8.848313000       | 1.515436000       |
| H | 3.36641491009391   | -5.22394548568064   | 5.37499250531868       | C | 3.312555000       | -7.83520000        | 2.528184000       | H | 0.788234000      | -7.853156000       | -0.431282000      |
| H | 5.36716626789937   |                     |                        |   |                   |                    |                   |   |                  |                    |                   |

|   |                   |                   |                    |   |                   |                   |                    |   |                   |                   |                    |
|---|-------------------|-------------------|--------------------|---|-------------------|-------------------|--------------------|---|-------------------|-------------------|--------------------|
| H | -3.4600708469382  | 2.49864942218235  | -3.31452257845858  | H | -3.20877115471973 | 2.03473671632397  | -3.66703196920885  | H | -3.20222820271708 | 2.26331451817805  | -3.42448356347815  |
| H | -3.41224119772883 | 3.98089732687513  | 0.81301177446880   | H | -3.30114310580823 | 3.94091435892294  | -3.50519819250171  | H | -3.31103849992807 | 2.21641464328903  | 0.74049435131258   |
| H | -3.21710531673276 | 2.2711204257195   | 1.02026601075856   | H | -3.23122526372726 | 3.56019440024747  | 0.641570753232     | H | -3.01863488242481 | 2.5012326254844   | -3.242725524442    |
| C | -3.64589226249574 | 3.33205226013888  | 2.84751143441501   | C | -3.61548986646137 | 3.54167892777099  | 2.2945371923024    | C | -3.22785202385635 | 3.7609909517302   | 2.8185714663340    |
| C | -3.39820254094682 | -0.73862025703469 | 4.32530117771123   | C | -3.31842994351099 | -0.6257360577609  | 4.32681992196214   | C | -3.1116781718249  | -0.0665612672664  | 4.3057290971635    |
| C | -3.14852400140972 | -1.17510548227467 | 2.23807642209477   | C | -3.0232041768161  | -0.8725184546907  | 2.20125918312716   | H | -2.95194494943453 | -0.716760372829   | 4.3297406412880    |
| H | -3.03139445343625 | -2.5446409802771  | 2.24092371079787   | H | -2.91171788689952 | -2.91141535813273 | 3.4411535813273    | H | -2.9184766509536  | -2.0184573087854  | 4.329620042719     |
| C | -3.35560671042948 | -3.623180535557   | -0.70992822101099  | C | -3.25928788531123 | -4.073797986749   | -0.16623729697635  | C | -3.46056726131326 | -4.187870478859   | -0.1882914240094   |
| H | -3.0632428725734  | -2.28289101547251 | -1.1728538866809   | H | -3.04261935181711 | -0.2242169301670  | -0.90240407843195  | H | -3.06246282036931 | -2.15491741069514 | -0.6942102400934   |
| H | -3.1448935775589  | -3.313888696838   | -2.57316642731709  | H | -3.02744804019835 | -3.62102171352526 | -2.15077920289671  | H | -3.08855925975791 | -3.22013850424018 | -0.2718649744970   |
| H | -1.29941248272023 | 2.0732071737221   | 4.2836708465565    | H | -1.04514400130136 | 1.45391425017609  | -4.53469092237513  | H | -0.95731796410017 | 1.64631757509254  | -1.239100474556    |
| C | 2.12602140165318  | 2.0705413715982   | 4.69469177931085   | C | 1.78944620310506  | 2.74191902963694  | 4.88768247388131   | C | 2.61179178961593  | 2.30621525355604  | 4.5613615435100    |
| H | -2.41133406418816 | -4.5432093675640  | 1.63365711358166   | C | 2.4897282260617   | -4.0922329366177  | 1.22880856883154   | C | 2.06082173461706  | -4.05208187761994 | -4.4505405894118   |
| H | 1.04494913560449  | 4.2803563970934   | -3.87316476641851  | H | 1.65486717613214  | 3.2624801741994   | -4.30409144251242  | H | 1.21855242358723  | 1.0655464829598   | -4.17650959047570  |
| H | 1.24240679226487  | 3.96490929649274  | 4.0364992348533    | H | 1.26753725544781  | 4.53933125849495  | 3.36787912569146   | H | 1.06521270515295  | 4.50075344115192  | 1.966205920776     |
| H | 1.14481119082451  | -1.46648680955459 | 4.3456392314472    | H | 1.03712550051071  | -0.8738941771975  | 4.9595609959719    | H | 1.2202380074673   | 1.0266561431733   | 4.6182878203117    |
| H | 1.6407897193887   | -9.2268140438018  | 3.58358851735651   | H | 1.9795049184745   | -0.30719855552481 | 4.03662542584841   | H | 1.83359382724250  | -4.37612376550004 | -4.2514852918154   |
| H | 1.0346669863173   | -0.2601236900742  | -1.82151358797879  | H | 1.09348518586169  | -4.5350912647061  | -1.27495306773925  | H | 1.44832842340659  | -5.5915898879970  | 0.39897612922769   |
| H | 1.3769767685782   | 3.9569791838907   | 1.177198718616077  | H | 1.58363531497714  | -4.2773032040863  | -3.65203366993416  | H | 0.9742468278261   | -2.2348989565545  | -1.7252297303087   |
| C | 0.7982334609191   | 4.9527270557855   | 0.62009025630166   | C | 0.0796238102935   | 4.82457891212452  | 0.08527016663171   | C | 0.7957159253095   | 5.2058709343386   | 3.221000108720     |
| C | 2.082386854716    | -1.59698159707369 | -0.52231595126485  | C | 2.0227434641191   | -2.2216078544190  | -0.50360341292972  | C | 2.14122503551462  | -2.0924563551360  | -4.2452035654213   |
| H | 0.6682970853946   | 1.8288762156384   | -4.61634315073650  | H | 0.84843920930206  | 1.09047473784787  | -4.89181557887130  | H | 1.00883372133639  | 1.3717470210121   | -4.42373027866994  |
| C | 1.8831273065949   | 5.0010720300700   | -1.94865217999975  | C | 2.1164132930854   | 2.95729143799558  | 1.32106266604      | C | 1.9575289827253   | 5.0871868204912   | -2.3905321277420   |
| H | 0.6944199481774   | 4.61275875114237  | 1.5357323810002    | H | 0.7263622454255   | 4.66782202170350  | 1.0153270478414    | H | 1.5631260129496   | 5.72126071705410  | -0.03928812411469  |
| N | 1.9551542584384   | -9.20273581860072 | -5.67669516724744  | N | 1.57521117114605  | -0.3011451487586  | -2.6783516216608   | N | 2.1436852974202   | -2.2891366887209  | -5.7942139326074   |
| N | 1.76735261989282  | 5.5647761698276   | -3.1484535386862   | N | 1.8674785311269   | 1.077118790762    | -2.68685043921445  | N | 1.7132899706988   | 5.5304574101311   | -7.7791292302220   |
| N | 1.95108802442938  | 3.3918795470445   | 5.33632148285218   | N | 1.2867662654455   | 2.9130369150515   | 6.24764130521129   | N | 2.36224012518058  | 2.5596837547974   | 5.98621678875219   |
| N | 2.35111850321218  | 2.29648464179129  | 4.258692425856     | N | 2.9138924214251   | 2.953499243586    | 4.4444407785401    | N | 0.94049041240649  | 4.2520741617001   | 2.1643741246541    |
| N | 2.4607832421475   | 1.2964684309285   | 5.39718681781832   | N | 2.6037253430957   | 1.59975453685520  | 4.93942952211899   | N | 3.2922401571377   | 1.4640458947073   | 5.9065125988489    |
| N | 2.10358020920911  | 1.2802534846772   | 3.9953780933944    | N | 2.3493044089344   | 3.6184450497973   | 4.5036154132540    | N | 1.9345480897613   | 3.1466836962613   | 4.0637714039893    |
| H | 2.6808442064158   | -5.2052077426293  | 0.83391142425736   | H | 1.2726733647990   | -4.3298403394121  | 1.2893259216343    | H | 2.99402535090136  | -4.34161342751995 | 2.245313565229     |
| H | 3.2323187261623   | -3.8121378145369  | 1.017198718616077  | H | 3.0123187261623   | -3.8121378145369  | 1.017198718616077  | H | 3.2323187261623   | -3.8121378145369  | 1.017198718616077  |
| H | 2.26237580323293  | -0.79421604055339 | -5.72468144203685  | H | 2.64377730418426  | -1.5504517549524  | -5.23824514567572  | H | 3.09370517913461  | -1.17939413561546 | -4.3329791923321   |
| H | 2.92270047379273  | -1.29233976954140 | -4.35774263388051  | H | 2.69440275926147  | -3.0528766740742  | -4.48027444795722  | H | 2.92329647860207  | -3.86367101509935 | -2.86367101509935  |
| H | 2.04723511482095  | 5.7745615616888   | -2.10198468879905  | H | 2.79868788237459  | 4.6182637596432   | -1.55338790712095  | H | 2.1697718980380   | 3.596481704131    | -1.7313114027811   |
| H | 2.27178767010111  | 4.362716780949921 | -1.266734698949921 | H | 2.66734698949921  | 4.362716780949921 | -1.266734698949921 | H | 2.27178767010111  | 4.362716780949921 | -1.266734698949921 |
| H | -5.14400276085533 | 0.84128582604101  | 2.75787171458460   | H | 1.3222581139691   | 3.3033519893862   | 2.15714690881320   | C | -3.47557990173348 | 3.5061858889835   | 2.76914527318355   |
| C | -3.35917945911234 | 4.6724736742828   | 3.5090796726268    | C | -3.3345872167443  | 4.9431937737578   | 2.81712780447886   | C | -2.79778689148981 | 5.0394857699409   | 3.24795664050121   |
| C | -4.913315694570   | -0.8215854678061  | 4.20898094745942   | C | -4.83058139694929 | -0.37571594941831 | 4.18714978421300   | C | -4.63294539303670 | -0.40194814604235 | 4.60394815038623   |
| C | -2.9262363693049  | -1.21674795927312 | 5.69056368047728   | C | -2.87921116098926 | -0.5988852725216  | 5.74780162660494   | C | -2.60859508050158 | -3.820262376453   | 6.0509636255908    |
| C | -4.87468542023025 | -4.2924057181999  | 4.717198718616077  | C | -4.87468542023025 | -4.2924057181999  | 4.717198718616077  | C | -4.87468542023025 | -4.2924057181999  | 4.717198718616077  |
| C | -2.8682393152010  | -5.79291370108992 | -1.17172323108992  | C | -2.79852195948626 | -5.82496762590572 | -0.43644276041131  | C | -3.14669052890922 | -5.14669052890922 | -0.62750014750597  |
| C | -3.59384084622884 | 4.5843590132789   | -4.20318487022013  | C | -3.9555790920433  | 0.0371695373321   | -4.35459389203671  | C | -3.885241400221   | 0.3196229039645   | -4.10137554341463  |
| C | -5.1432117579571  | 1.0864305364570   | -5.78343463816375  | C | -3.0938767929488  | 0.48394861375787  | -5.97256130770700  | C | -2.9290622651970  | 0.94566796947594  | -5.6570351305292   |
| C | -3.2911798563714  | -4.3232949459456  | 5.9908398096962    | C | -3.04904978145067 | -4.3232949459456  | 5.9908398096962    | C | -3.2911798563714  | -4.3232949459456  | 5.9908398096962    |
| H | -3.2124127296657  | 2.5900622571249   | 3.47559774652433   | H | -3.23359594072841 | 2.8290229759624   | 3.0289802009852    | H | -2.86083390094785 | 2.88025285192794  | 3.4661790448599    |
| H | -3.12200015538823 | 0.3731397988306   | 4.231918369591276  | H | -3.0391847608009  | 0.77012812715964  | 4.12238879087005   | H | -2.7934345418526  | 0.9482942971056   | 4.414684152069     |
| H | -3.57071641265907 | -4.22018812180702 | 3.0232686467962    | H | -2.92842321836043 | -4.1671472658314  | 0.8990839463057    | H | -3.11679435448909 | -4.070676667719   | 0.84036023382489   |
| H | -5.62870134449259 | 2.138729949459456 | 2.3169114173284    | H | -5.62870134449259 | 2.138729949459456 | 2.3169114173284    | H | -5.62870134449259 | 2.138729949459456 | 2.3169114173284    |
| H | -3.5709217510179  | 2.10803031293524  | 2.3169114173284    | H | -3.5709217510179  | 2.10803031293524  | 2.3169114173284    | H | -3.5709217510179  | 2.10803031293524  | 2.3169114173284    |
| H | -5.6117034163776  | 3.11581758011371  | 3.74257350108862   | H | -5.6117034163776  | 3.11581758011371  | 3.74257350108862   | H | -5.6117034163776  | 3.11581758011371  | 3.74257350108862   |
| H | -2.95110905416078 | 4.83050224162045  | 3.67131693574533   | H | -2.95110905416078 | 4.83050224162045  | 3.67131693574533   | H | -2.95110905416078 | 4.83050224162045  | 3.67131693574533   |
| H | -3.73016021100175 | 5.4956563045716   | 2.89585858036837   | H | -3.73016021100175 | 5.4956563045716   | 2.89585858036837   | H | -3.73016021100175 | 5.4956563045716   | 2.89585858036837   |
| H | -3.84942634282524 | -4.2924057181999  | 4.8055272997408    | H | -3.84942634282524 | -4.2924057181999  | 4.8055272997408    | H | -3.84942634282524 | -4.2924057181999  | 4.8055272997408    |
| H | -5.26086846705995 | -0.4681396470809  | 3.24194917213907   | H | -5.26086846705995 | -0.4681396470809  | 3.24194917213907   | H | -5.26086846705995 | -0.4681396470809  | 3.24194917213907   |
| H | -5.246049739813   | -1.8665512306546  | 4.3141859061608    | H | -5.246049739813   | -1.8665512306546  | 4.3141859061608    | H | -5.246049739813   | -1.8665512306546  | 4.3141859061608    |
| H | -5.0471208677198  | -0.24471467510263 | 4.98307236584937   | H | -5.0471208677198  | -0.24471467510263 | 4.98307236584937   | H | -5.0471208677198  | -0.24471467510263 | 4.98307236584937   |
| H | -3.1128469951212  | -2.2845895996234  | 5.9908398096962    | H | -3.1128469951212  | -2.2845895996234  | 5.9908398096962    | H | -3.1128469951212  | -2.2845895996234  | 5.9908398096962    |
| H | -1.8621154555127  | -1.04418212136313 | 5.83841737939498   | H | -1.8621154555127  | -1.04418212136313 | 5.83841737939498   | H | -1.8621154555127  | -1.04418212136313 | 5.83841737939498   |
| H | -3.4557688291306  | -0.6957649319833  | 6.4885434841160    | H | -3.4557688291306  | -0.6957649319833  | 6.4885434841160    | H | -3.4557688291306  | -0.6957649319833  | 6.4885434841160    |
| H | -5.2285736014210  | -3.32409825990502 | -0.3621327489175   | H | -5.2285           |                   |                    |   |                   |                   |                    |



|   |                   |                   |                   |   |                    |                   |                   |   |                   |                   |                   |
|---|-------------------|-------------------|-------------------|---|--------------------|-------------------|-------------------|---|-------------------|-------------------|-------------------|
| C | -0.8028414760027  | -2.10039443046143 | -2.50408223151718 | C | -0.6393356038250   | -2.344861391902   | -2.28211863710234 | C | -0.11914801952826 | -2.2811302090331  | -1.96877428214109 |
| C | 0.2361907847152   | -2.36970686060940 | -3.39707713944398 | C | 0.37225183174017   | -2.300869402422   | -3.16758914381332 | C | 1.02972318550525  | -2.7818335929411  | -2.71907842045034 |
| C | 0.374889172824455 | -1.3831467125329  | -2.4396467125329  | C | 0.4874256125329    | -1.398756125329   | -2.4396467125329  | C | 1.52623624170029  | -3.6881261361206  | -3.6881261361206  |
| C | 0.18433320011825  | -2.10221007600118 | -4.2115168505663  | C | 0.3375275646696    | -4.57008391209217 | -4.21146215646755 | C | 0.8766326654944   | -4.4884141275032  | -3.84396310292862 |
| C | -0.8828641326287  | -0.1512008520148  | -3.35221310632705 | C | -0.7070794250352   | -3.085413252911   | -3.37166782536459 | C | -0.2712174308674  | -1.2454004682712  | -1.1108004463767  |
| C | -1.32107700147094 | -0.814605792443   | -2.4995617062730  | C | -1.14569967537799  | -1.168413404067   | -2.41271550686761 | C | -0.17800716809040 | -1.04946288982970 | -2.17933330045034 |
| C | 0.75533800778854  | -3.6277117840071  | -3.4179225906802  | C | 0.85570672601065   | -4.00918872601065 | -3.03559238220359 | C | 0.169994067062261 | -3.7618273736538  | -2.58271841683008 |
| C | 0.72299138849939  | 0.8292851939939   | -0.05645445489818 | C | 0.87564150567744   | 0.26606453506744  | -1.5218285352601  | C | 0.11678759887484  | 0.3978159971234   | -4.7698442460319  |
| H | -2.12457703917903 | -0.5861207021316  | -1.81481667681511 | H | -94.1327955182091  | -1.05445454589818 | -1.75020517576069 | H | -1.60453620135568 | -8.80691414519735 | -1.61255000848117 |
| C | -1.55215879084863 | 1.5532115324451   | -3.34949965687617 | C | -1.37302435454154  | 1.1928013039362   | -3.52610361617209 | C | -0.11919485522316 | 1.17264362144889  | -3.33899144100955 |
| C | -0.9675866959248  | 2.4552491437453   | -2.28204415794278 | C | -0.87765810540016  | 2.2114115569176   | -2.5768356219763  | C | -0.51384414472349 | 2.2669022891843   | -2.42009457382792 |
| C | 0.1160044869794   | 3.27908535564142  | -2.5890805182870  | C | 0.25589577940518   | 3.05243577940518  | -2.983661877940   | C | 0.4299422503964   | 3.18040538064457  | -2.8807489002314  |
| C | 0.7087996016509   | 4.09986952108414  | -1.62279472547948 | C | 0.8366332838829    | 3.99237404095111  | -2.1312445261417  | C | 0.9204887220745   | 4.21061671481405  | -2.06315756972761 |
| C | 0.1955187579232   | 4.094028545667    | -0.3218535484888  | C | 0.33733024802462   | 4.1068435061578   | -0.82484578124891 | C | 0.4216810826620   | 4.3097908203278   | -2.76470977308034 |
| C | 0.91317165683114  | 3.30479392150032  | 0.01160945225929  | C | -0.7351306319714   | 3.31210994378546  | -0.3877345279739  | C | -0.52086036803427 | 3.41052866480064  | -2.6143879720109  |
| C | -1.44438201390607 | 2.4864255111044   | -0.97797562131956 | C | -1.24800536211649  | 2.377796282636    | -1.27814105487115 | C | -0.9523056927006  | 2.39874551926385  | -1.1082875621226  |
| C | 0.06124776253787  | -2.36958243830063 | -1.86383764894649 | C | 0.69131393988497   | 2.9012940622840   | -2.8518238083162  | C | 0.8901471952080   | 2.8910935826105   | -4.15990275202483 |
| H | -2.27474000424951 | 1.84912121102513  | -0.72404284789324 | H | -0.25910106348481  | 1.7477383561451   | -0.9471917068358  | H | -1.66308565132488 | 1.680942595305    | -2.328352691354   |
| C | -1.50060479626238 | 3.33171879649888  | 1.41066764833880  | C | -1.31900615773212  | 3.488384545672    | 1.00271583092923  | C | -1.03253237916998 | 3.5390270978447   | 1.16048358619493  |
| C | -0.8386719556127  | 3.3085164531028   | 1.826558759649    | C | -0.83560127235912  | 3.2858757910777   | 2.0041345473444   | C | -0.29239388449985 | 2.61918425408339  | 2.11428015992759  |
| C | 0.2159435466866   | 2.66463706303883  | 1.14157439078362  | C | 0.38528716358966   | 3.3005383902085   | 2.81827186657623  | C | 0.8248057412343   | 3.0612848152520   | 2.83380836011999  |
| C | 0.8554163387066   | 1.72638232406496  | 0.9584980531493   | C | 1.01454608836815   | 2.376542027968    | 3.7467251686739   | C | 1.46725946635535  | 2.2371790883094   | 2.76559426123227  |
| C | 0.1447668952538   | 0.39964824154183  | 0.93889601295730  | C | 0.56479646657195   | 0.84997556528870  | 3.85921551878390  | C | 0.93967914802029  | 0.93464376154212  | 3.95157526954271  |
| C | -0.66623489620385 | 0.0118367983491   | 1.31501971487131  | C | -0.5052519980081   | 0.0118367983491   | 3.0907264823833   | C | -0.12381735664685 | 0.45916998974265  | 3.9139954111448   |
| C | -0.88388708880    | 2.971041264126416 | 2.3119192552833   | C | -1.0636789220163   | 1.245134195358643 | 2.16358053345794  | C | -0.18178037439913 | 1.31679013169793  | 3.23721162574785  |
| C | 0.63787565138442  | 3.96818797076050  | 3.147729687173556 | C | 0.76683765340468   | 4.2324554653318   | 2.65746045580568  | C | 1.3047698768064   | 4.0137236768676   | 2.678803242683    |
| C | 0.10977209475846  | -0.48041099125846 | 3.14753660218907  | C | 0.2095682186439    | 4.0085602053493   | 4.77136469903587  | C | 1.6558478486077   | 4.16272235009065  | 4.8606729091007   |
| H | -2.0545428066251  | 0.68800800443487  | 1.67118315794257  | H | -1.84858437473222  | 0.80956656377997  | 1.55723456681397  | H | -1.5898914919167  | 0.9688345121999   | 1.8015721733209   |
| C | -1.2132296663371  | -1.40157159479    | 2.06735079191249  | C | -1.0625752495193   | 1.0625752495193   | 2.06735079191249  | C | -0.8626680717004  | 1.5886569078450   | 1.47479221700759  |
| C | -0.6160752674570  | -2.2501311385195  | 2.06735079191249  | C | -0.46551791565027  | -0.009546510902   | 2.29406967691919  | C | -0.099930353167   | -1.9580160834627  | 2.5670218362031   |
| C | 0.5040327380876   | -2.9938375275313  | 2.31351297673433  | C | 0.6250435201253    | -2.6534872032935  | 2.63492411114446  | C | 0.9648080581414   | -2.1713532149031  | 2.9609770094830   |
| C | 1.31865622299272  | -0.8460415869288  | 1.3185696720228   | C | 1.31865622299272   | -0.8460415869288  | 1.3185696720228   | C | 1.31865622299272  | -0.8460415869288  | 1.3185696720228   |
| C | 0.54570250206633  | -0.8460415869288  | 1.3185696720228   | C | 0.54570250206633   | -0.8460415869288  | 1.3185696720228   | C | 0.54570250206633  | -0.8460415869288  | 1.3185696720228   |
| C | -0.63043366306455 | -0.10649038432372 | -0.22341049539285 | C | -0.4782462408156   | -3.0900248846024  | 1.0605270841985   | C | -0.10262367034192 | -0.8026418534491  | 1.40063384702922  |
| C | -1.15863013966522 | -2.3205580334878  | 0.7943030348878   | C | -0.9938912342087   | -1.8790613524808  | 1.02703045090676  | C | -0.59180094872802 | -2.1301605427824  | 1.828234425314    |
| C | -0.106373992372   | -2.9388778823134  | 3.55770499619965  | C | 1.15268400297746   | -2.5847313278781  | 3.90922125507014  | C | 0.1447013819592   | -2.790106809290   | 4.24228664615693  |
| C | 1.174267643428013 | -0.0104664151028  | 0.7719192357710   | C | 1.174267643428013  | -0.0104664151028  | 0.7719192357710   | C | 1.174267643428013 | -0.0104664151028  | 0.7719192357710   |
| H | -1.05093713789378 | -1.75308580844444 | -0.58326612381819 | H | -1.806925203781408 | -2.680825033201   | 0.74743370216272  | H | -1.40833545302427 | -1.5029651376434  | 0.95814656666667  |
| C | -1.360953591497   | -1.8634213446567  | -1.57646550207298 | C | -1.15229951121394  | -1.3706369398744  | -1.23346377526363 | C | -0.69175780326366 | -2.27656728150449 | -0.8799929739142  |
| C | -0.3072088162092  | 1.46311215167841  | -3.28207954530420 | C | -2.90107421127819  | 1.11708366909810  | -3.85921551878390 | C | -2.54299844317007 | 1.02245878031067  | -3.28024870471322 |
| C | -0.32081962437893 | 3.2887546391233   | 1.42412265784827  | C | -1.3717769248976   | 3.37617255567989  | 1.01579533316155  | C | -2.5559783840860  | 3.3975667989589   | 1.23928139687176  |
| H | -1.2662245794474  | -0.00827563075469 | 1.985876660571501 | H | -1.2662245794474   | -0.00827563075469 | 1.985876660571501 | H | -1.2662245794474  | -0.00827563075469 | 1.985876660571501 |
| C | -2.74341150450817 | -1.44996084499465 | 3.19082668791912  | C | -2.593972761531    | 3.19082668791912  | 3.2927366560021   | C | -2.2138369512911  | 3.27244489720731  | 3.5514083143212   |
| C | -0.8840516357074  | -1.84878607631157 | 4.1048955182962   | C | -0.76487803726081  | -1.3565824050207  | 4.12758151405403  | C | -0.7819716212661  | -2.115115518256   | 4.1584089838342   |
| C | -2.8394545929563  | -2.2213540638062  | -1.49524021495211 | C | -2.6820552992734   | -3.1366692228751  | -1.4299180794598  | C | -2.2224640108719  | -3.2996176800905  | -0.9680187259885  |
| H | -1.01285904518142 | -0.00827563075469 | 1.985876660571501 | H | -1.01285904518142  | -0.00827563075469 | 1.985876660571501 | H | -1.01285904518142 | -0.00827563075469 | 1.985876660571501 |
| C | -3.72912880524176 | 0.65590911922995  | -4.40254767481842 | C | -3.55973104287186  | 0.15738356254373  | -4.42658159652855 | C | -3.13353117346433 | -0.0137589943991  | -2.3728972039517  |
| H | -3.3954005298993  | 1.0395440852921   | -2.32901458018865 | H | -3.214913206561    | 0.84149316714029  | -2.43194756117174 | H | -2.87169614883288 | 0.7878691083714   | -2.8716961083714  |
| C | -3.7454845305664  | 2.48218355409070  | -3.30170652293190 | C | -3.214913206561    | 0.84149316714029  | -2.43194756117174 | C | -2.9730125156023  | 2.0010960989031   | -2.31399690972512 |
| C | -3.4251398781126  | 4.0104664151028   | 0.7719192357710   | C | -3.4251398781126   | 4.0104664151028   | 0.7719192357710   | C | -3.4251398781126  | 4.0104664151028   | 0.7719192357710   |
| H | -3.51739471930808 | 4.0104664151028   | 0.7719192357710   | H | -3.51739471930808  | 4.0104664151028   | 0.7719192357710   | H | -3.51739471930808 | 4.0104664151028   | 0.7719192357710   |
| C | -3.6677796015748  | 3.3559260236065   | 2.80407787946380  | C | -3.6677796015748   | 3.3559260236065   | 2.80407787946380  | C | -3.6677796015748  | 3.3559260236065   | 2.80407787946380  |
| C | -0.4169855810748  | -0.3004044733426  | 4.34118750216296  | C | -1.2421490176767   | -1.2421490176767  | 4.34118750216296  | C | -0.4169855810748  | -0.3004044733426  | 4.34118750216296  |
| C | -0.0396277736971  | -0.301029419159   | 3.2405519293560   | C | -0.0396277736971   | -0.301029419159   | 3.2405519293560   | C | -0.0396277736971  | -0.301029419159   | 3.2405519293560   |
| C | -3.41937466709860 | -3.4654310430598  | -0.64504938532616 | C | -3.28048989891249  | -4.3232118203714  | -0.17055043410704 | C | -3.28048989891249 | -4.3232118203714  | -0.17055043410704 |
| H | -3.2223370143771  | -2.7298241758609  | -1.12372376860919 | H | -3.2223370143771   | -2.7298241758609  | -1.12372376860919 | H | -3.2223370143771  | -2.7298241758609  | -1.12372376860919 |
| C | -1.2345722246866  | 0.0209116495636   | -2.1566645789942  | C | -1.2345722246866   | 0.0209116495636   | -2.1566645789942  | C | -1.2345722246866  | 0.0209116495636   | -2.1566645789942  |
| C | 2.0417834262372   | 2.13910347439829  | 4.78353745398192  | C | 2.0417834262372    | 2.13910347439829  | 4.78353745398192  | C | 2.0417834262372   | 2.13910347439829  | 4.78353745398192  |
| C | 2.4140218810519   | -4.5139012254159  | -0.4504595480896  | C | 2.4140218810519    | -4.5139012254159  | -0.4504595480896  | C | 2.4140218810519   | -4.5139012254159  | -0.4504595480896  |
| H | 1.23539409145476  | -0.9735136177284  | -3.92191562091463 | H | 1.23539409145476   | -0.9735136177284  | -3.92191562091463 | H | 1.23539409145476  | -0.9735136177284  | -3.92191562091463 |
| C | -1.24             |                   |                   |   |                    |                   |                   |   |                   |                   |                   |

|   |                  |                   |                   |   |                   |                   |                   |   |                   |                   |                   |
|---|------------------|-------------------|-------------------|---|-------------------|-------------------|-------------------|---|-------------------|-------------------|-------------------|
| C | 2.6031991241677  | -6.63191160319364 | 4.61967718886464  | C | 2.69943764200725  | -7.93891405847082 | 3.38371695847082  | C | 3.29237715257693  | -8.1775306612849  | 1.76377869851915  |
| C | 2.78887519194833 | 6.64205135100234  | -5.1361558381351  | C | 2.78887519194833  | 6.64205135100234  | -5.1361558381351  | C | 2.3120287489530   | 6.6331572489530   | -5.970172489530   |
| C | 1.92758621206331 | 0.9075959189636   | 1.9275959189636   | C | 1.9825579387164   | 8.93700543935261  | 0.9279689615738   | C | 0.795860549070328 | 6.5768673137310   | -5.69747935119367 |
| H | 1.09850670826089 | 2.8336670869875   | 7.17049161122071  | H | 3.4886719816511   | 0.5009676677812   | 6.34717169738104  | H | 2.10731661818863  | 2.0146326048971   | 7.04970840495391  |
| H | 3.58785755115130 | 3.58787570897440  | 6.54573148849347  | H | 1.25897106226112  | 5.03934967897912  | 5.4416216542034   | H | 4.13892480916015  | 3.50883471066197  | 6.57862367847434  |
| H | 0.89786226250566 | 5.04682170849095  | 6.02267052621219  | H | 2.73319905523803  | 8.83219150233952  | 8.48429150233952  | H | 1.52315107829130  | 3.45617692419931  | 8.83933158629987  |
| H | 0.473878170887   | 5.7121019183391   | 6.4563419997723   | H | 1.9753691944813   | 8.8340817939613   | 8.8340817939613   | H | 0.805934945917489 | 4.5288735577334   | 7.80541142566559  |
| H | 2.69598297127505 | 0.900129705505    | 6.04881994174426  | H | 0.05189993990701  | 3.99859047446689  | 3.522399832720    | H | 2.4555021925078   | 7.885401666228    | 7.46617110742033  |
| H | 1.39388834492204 | 5.45166781682401  | 7.55229942428041  | H | 0.01691293575387  | 5.5901452113095   | 7.65318677018510  | H | 3.45451564520706  | 7.4884503210980   | 8.4372621767095   |
| H | 1.90699951053982 | -5.6781820647721  | -6.3584935891868  | H | 0.92007720440136  | -5.7814734784226  | -7.1870921626058  | H | 0.8619178346505   | -3.7143296026617  | -7.8807710368005  |
| H | 1.32916281583629 | -4.931651000177   | -7.8974814129082  | H | 1.98800842075758  | -5.240551858578   | -5.8971791532668  | H | 1.71635770317610  | -5.1702341636266  | -7.535740170170   |
| H | 0.9547556564165  | -4.7164582497043  | -8.3028939072920  | H | 3.40487078755373  | -4.8278013207065  | -7.8214863975214  | H | 3.7486064203609   | -0.08324877384502 | -8.30794975919519 |
| H | 0.6413962147935  | -5.4206000210800  | -6.7278757588075  | H | 2.02177932155150  | -4.0693723227590  | -8.81371120521494 | H | 2.76493404307913  | -0.684573577736   | -7.80057322886870 |
| H | 1.3659968890421  | -5.5495716384685  | 5.58617514772582  | H | 0.53047228171759  | -7.9640877559477  | 3.61161772832433  | H | 1.2009027490777   | -8.8134159039774  | 1.16737690681097  |
| H | 4.18453962471871 | -7.04271659019789 | 4.87336062719323  | H | 1.36926106429159  | -7.63412812971716 | 5.1167024063699   | H | 1.84660359054415  | -8.91985478463610 | 2.789979711140    |
| H | 1.9016993252095  | -7.7049374955665  | 4.73637245945536  | H | 1.39749458248248  | -8.5081039590877  | 4.1033498850508   | H | 3.82376014905887  | -8.90646916198734 | 2.36707409406951  |
| H | 1.43563138501851 | -6.14496521424669 | 5.38866398737082  | H | 2.49285057988871  | -8.70581421161008 | 2.64032850648481  | H | 3.46576837325823  | -8.42848422126518 | 0.72007262991906  |
| H | 2.92472968148171 | 6.0032597852224   | -6.00584903959597 | H | 0.05179979799577  | -8.20770997214607 | -0.0348792372821  | H | 2.49961927272912  | 5.4927290540332   | -6.7880712269735  |
| H | 3.4161841982909  | 7.51880539664470  | -5.27577468092259 | H | 0.573743116002192 | 7.89727615507167  | -5.5789085866409  | H | 2.76262224077622  | 7.58545619002072  | -6.2386014889975  |
| H | 1.1134074315038  | 8.073273467316189 | -5.06085290516708 | H | 2.62175595489429  | 8.73572348278589  | -6.09405347229493 | H | 0.4173405070009   | 7.758589357831    | -5.88475196126820 |
| H | 0.6880475958085  | 6.49722960169937  | -5.6949207002954  | H | 1.7755048708366   | 0.9834821521882   | -3.1981051212413  | H | 0.23732579592759  | 6.0021873526390   | -6.33187478588885 |

6

|   |                   |                   |                   |   |                    |                   |                   |   |                    |                   |                   |
|---|-------------------|-------------------|-------------------|---|--------------------|-------------------|-------------------|---|--------------------|-------------------|-------------------|
| C | 0.18302944054556  | 1.3242383645554   | -2.94698962269748 | C | -0.0605594881292   | 1.70750688107400  | -2.7572731183800  | C | 0.1169120236486    | -2.1418911285470  | -2.355299458105   |
| C | -0.9456512853005  | 1.35237611247084  | -3.76697660120097 | C | -1.14525244706377  | 0.8744765639677   | -3.6268291138586  | C | 1.27565648218628   | -2.4446925925291  | -2.89821383089896 |
| C | -1.52844059725094 | 0.1771488838745   | -4.25444088909372 | C | -3.71638698918414  | 1.06276440410807  | -4.2953451005395  | C | 1.75234243040569   | -3.8304830666190  | -3.80040085856424 |
| C | -0.9391202380137  | -0.0512710183391  | 3.91117780736329  | C | -1.167417324780295 | 1.167417324780295 | -3.2520127740326  | C | 1.02617941100505   | -3.2520127740326  | -3.2520127740326  |
| C | 0.19127433492030  | -1.1147368579636  | -3.11301103523069 | C | -0.05179570957504  | -0.6878205813911  | -3.2357456203212  | C | -0.08403973587109  | -0.00678801354066 | -3.17237311486376 |
| C | 0.70547319392522  | 0.08106893710586  | -2.62739076261167 | C | 0.4453374951943    | 0.430580794716943 | -2.57990379051074 | C | -0.51173641926026  | -0.98912813491565 | -3.05173953692934 |
| C | -1.48807960388766 | 2.56326189154079  | -4.10174259266301 | C | -0.16176949506020  | 3.3101848139315   | -3.81061047222100 | C | 0.197579203282743  | -3.61581645541363 | -2.8207178792819  |
| C | -1.57576553776615 | -1.9267462675555  | -4.10174259266301 | C | -1.57576553776615  | -1.9267462675555  | -4.10174259266301 | C | 1.75859097938255   | -1.75859097938255 | -4.10174259266301 |
| C | 0.28599691682754  | -0.0045660723564  | -1.5029863191629  | C | -1.29495268087467  | 3.3101848139315   | -1.9792580959252  | C | -1.40652347746513  | -0.9818764732405  | -7.8187058988152  |
| C | -0.37528372466624 | -4.322276648314   | -2.78717548031211 | C | 0.61931417314954   | -2.2045780627841  | -0.08356986273290 | C | -0.8600041145518   | 1.2837893046560   | -3.334230969535   |
| C | 0.0969996160467   | -0.0045660723564  | -1.5029863191629  | C | 0.0752500885667    | -2.084736983976   | -1.87742077377259 | C | -0.37474048081448  | 2.3433784181094   | -2.36733050494152 |
| C | -0.7528372466624  | -4.322276648314   | -2.78717548031211 | C | -0.9682768994062   | -2.084736983976   | -1.87742077377259 | C | 3.30034618411270   | -7.5957461811270  | -7.5957461811270  |
| C | -1.3242015565730  | -4.44320705014283 | -0.37960560140922 | C | -1.48247311665216  | -4.403876762286   | -0.92701603412940 | C | 1.05542831775084   | 4.3003535207510   | -1.93471468301760 |
| C | -0.81230149663134 | -0.40520488032574 | 0.8593225849259   | C | -0.93777316582781  | -4.1603878140073  | 0.34380025408969  | C | 0.5369851648520    | 2.3237893046560   | -3.334230969535   |
| C | 0.72711797029229  | -3.15883451569314 | 0.93628563982379  | C | 0.1274838412767    | -3.26912704904578 | 0.51583547844100  | C | -0.37492481894833  | 3.3808517056260   | -1.05081346465092 |
| C | 0.1611718989809   | -2.635053673816   | -0.9682768994062  | C | 0.57766130170657   | -0.46983417428197 | -0.40799852127024 | C | -0.7099852127024   | 2.4005757309392   | -1.47582182126928 |
| C | -1.228498529614   | -4.322276648314   | -2.78717548031211 | C | -0.0517324780295   | 1.167417324780295 | -3.2520127740326  | C | 0.298317428147009  | 0.95173281641409  | -0.00678801354066 |
| H | 1.581393606515    | -1.92933145128182 | -0.19559180070489 | H | 1.39458907644095   | -1.8851982325913  | -0.47722761341353 | H | -1.483349041763015 | 1.64816304530673  | -0.69291778018651 |
| C | 0.9053252737067   | -2.7950147020239  | 2.26068058034303  | C | 0.79682574050239   | -3.08107365142594 | 1.86637525973226  | C | -0.8079387783351   | 1.27415323044575  | 1.27415323044575  |
| C | -0.3063889953575  | -1.5140009518126  | 2.80565787964305  | C | 0.1829209705776    | -1.90795132574125 | 2.60576924281029  | C | -0.10574165807171  | 2.74639527484844  | 2.1732350740842   |
| C | -0.7888857945671  | -2.6679623150905  | 2.6679623150905   | C | -1.85897310955205  | 2.09991931504149  | -5.5194412728072  | C | 0.9167180194909    | 1.05328215677853  | 2.89252600817158  |
| C | 1.1861130627951   | -0.40434687211824 | 4.1734493218635   | C | -1.45639132572676  | -4.10436937860729 | -1.1988323964753  | C | 1.68093692849279   | 4.041786627899    | 3.7812471697410   |
| C | -0.654639149724   | 3.08851407195730  | 3.08851407195730  | C | -0.98551172937933  | 0.2533116632603   | 3.95117003247432  | C | 1.23492842057485   | 7.2202244416625   | 3.9013897160759   |
| C | 0.28458899120474  | 0.92461548959104  | 2.96926415705259  | C | 0.08277713710395   | 0.48286836289157  | 3.0762719698034   | C | 0.10144660008887   | 0.26421479977901  | 3.19495313253844  |
| C | 0.3786435657088   | -0.2596186802162  | -2.4654903290282  | C | 0.61615202154579   | 0.0653498245942   | 2.40159374677862  | C | -0.58016547227805  | 1.578081387365    | -2.355299458105   |
| C | -1.2882599753079  | -2.78997976325559 | 4.02708120862584  | C | -0.12415535616368  | -3.409570396149   | 3.73395100183850  | C | 1.5077545796191    | 4.17117390871662  | 2.79951516711794  |
| C | -1.4774212245196  | 0.9373224496912   | 4.32674218578946  | C | -1.59639430822367  | 1.727917255102    | 0.248730511770    | C | 0.96276820041580   | -0.48027199739049 | -4.79263800629941 |
| H | 1.6373630712931   | -0.19574348648593 | 6.20193810302820  | H | 1.42767070911226   | 0.43434071715927  | 1.7163063218546   | H | -1.3826989322259   | -1.04284949526913 | 1.79704234644231  |
| C | 0.89487453176892  | 2.65305761657594  | 2.62081004089372  | C | 0.08942714879599   | -0.9895738475959  | -3.5405183928678  | C | 0.89487453176892   | 2.65305761657594  | 2.62081004089372  |
| C | -0.2727589154479  | 2.8167147449408   | 3.564969731613    | C | -0.2727589154479   | 2.8167147449408   | 3.564969731613    | C | 0.11809652651070   | -1.1809652651070  | -4.003465270736   |
| C | -0.7867407307194  | 2.8167147449408   | 3.564969731613    | C | -1.3035235930030   | 3.4605155277833   | 1.92174171089367  | C | 1.2430626450974    | -2.9409565754363  | 2.74862011440939  |
| C | -1.40566663780126 | 4.22974667687363  | 0.28757529445986  | C | -1.64403979500613  | 3.151504459311    | 0.86818939672131  | C | 1.79929380501000   | -3.8518382842372  | 1.85118379602711  |
| C | -0.9211704780219  | 3.841674802359    | -0.9367525461039  | C | -1.16754195882309  | 3.053229364066    | -0.4318480280020  | C | 1.24082424666432   | -3.9339364445203  | 0.56496341916732  |
| C | 1.718081081718    | 2.7673843864344   | 1.0806259336163   | C | -1.16754195882309  | 3.053229364066    | -0.4318480280020  | C | 0.1637180194909    | 1.05328215677853  | 2.89252600817158  |
| C | 1.37189513480230  | 2.45747522448074  | 0.0911330736739   | C | -1.25096430871986  | 2.40709355031351  | 3.973039727304    | C | -0.330008484898    | -2.23305638972481 | 1.04114514671839  |
| C | -0.1233449443324  | -1.0121302109755  | 2.66993723204910  | C | -1.43863197444054  | 3.6483974340703   | 3.22900904626518  | C | 0.73150927077991   | -2.79845804119972 | 4.0350174377991   |
| C | -1.55426181146463 | 4.30661624321044  | -2.05714770670415 | C | -0.8082248557659   | 3.5743957053512   | -1.43596646687858 | C | 0.1571025182070    | -1.8518188008187  | -0.3394735101262  |
| C | 0.77128846368992  | 2.61914171257456  | -2.42925165116811 | C | 1.31250643454381   | 1.31250643454381  | 1.31250643454381  | C | -0.4311977805264   | -3.2712780530265  | -2.10199308674006 |
| C | 2.39228053964707  | -2.34048603759670 | -2.81958031595830 | C | 2.15108371720068   | -1.9253234446465  | -3.12104314761249 | C | -3.27946827173372  | 1.1004658510324   | -2.7940882506527  |
| C |                   |                   |                   |   |                    |                   |                   |   |                    |                   |                   |

|                      |                   |                    |                      |                    |                   |                      |                    |                   |
|----------------------|-------------------|--------------------|----------------------|--------------------|-------------------|----------------------|--------------------|-------------------|
| C -3.64480474185285  | -6.91191871239667 | -1.98608685674793  | C -1.29583131206904  | -7.09812268076487  | -2.2311132806447  | C 1.76343688829440   | 2.70076681632731   | 6.73253488829440  |
| C -1.43205103248631  | -7.19394858222289 | -6.4399272123547   | C -1.435161793601786 | -2.045057193601786 | -7.0057411758247  | C 3.620518139691786  | 4.018293139691786  | 6.30140273065480  |
| C -1.93768597850590  | -7.93705400022613 | -2.53834520912413  | C -1.25989536735027  | -8.2880122835707   | -0.97866852814991 | H 1.07516440061154   | -3.52851544359207  | -8.32851544359207 |
| C -2.45975536559522  | -8.57263544091305 | -3.01409246113705  | C -2.16295385624969  | -9.1418865159615   | -2.05838615792703 | H 2.58273989080018   | -1.166028423248    | -5.75607889549066 |
| C -3.5283082061018   | -7.50968076225996 | -3.21707765267511  | C -0.98200686959702  | -8.25714337853067  | -2.05044641792869 | H -4.0755615871033   | -1.1208133686827   | -6.68374416760643 |
| C -1.0390404478021   | -7.2290348414771  | -7.84872941356156  | C -1.8402635464417   | -9.243072545059    | -8.8258741839767  | H 4.6002305722086    | -2.8589015105883   | -6.4530726386089  |
| C -2.74354630085156  | -3.16839610138137 | -8.41486803134871  | C -1.1798047006455   | -9.4508952984745   | -2.4275745292525  | H 0.9253171926751    | -2.4275745292525   | -2.4275745292525  |
| C -3.7682394539450   | -3.30441437613462 | -7.2986252402063   | C -1.7724089088194   | -2.79825791699936  | -8.48185177030438 | H 1.212991454030513  | -0.40352122401     | -3.28401128933274 |
| C -1.11215689180838  | -8.16878385922650 | -2.59466759623189  | C -2.3787924426360   | -9.1530671724466   | -8.01766633757660 | H 4.89935271314795   | -0.60932510683025  | -1.06774573420215 |
| C -2.4110813027723   | -8.82205905997550 | -3.04014561712047  | C -1.85333696307376  | -9.28327692511402  | -1.99662382114402 | H 4.52861088721858   | -6.9201485070048   | -2.98743174325815 |
| C -3.49258046607399  | -7.76055480490176 | -3.22764580490176  | C -1.07418614805927  | -8.50757694810635  | -2.16228972645443 | H 3.26423167116054   | -7.19867437525750  | -3.90663958592    |
| C -1.7760425875859   | -5.2961515133265  | -7.90397371314404  | C -1.31784704964785  | -6.0020148591607   | -8.98631035965736 | H 3.83490449930251   | -5.5846820946601   | -4.3320508949190  |
| C -1.19429505416211  | -3.0222939749664  | -7.25540501653717  | C -1.11773315228483  | -9.0351402540715   | -8.43236798540175 | H -0.134925191827603 | -6.0384191956201   | -3.441725735011   |
| H -1.87798522787864  | -0.63080864508838 | -7.64986303938540  | C -1.5594090054087   | -8.35696956623835  | -7.29561612234623 | H 0.831915016590489  | -7.47042601340956  | -3.37873655289129 |
| H -0.61240249703137  | -1.1862908113506  | -6.55743880378516  | C -2.17671895988803  | -0.5267409445480   | -7.00167186776241 | H 0.91223682555205   | -2.08362348646981  | -6.26013706699114 |
| H -1.6332201577480   | -7.93229326017280 | -0.51654287812587  | C -3.906628180510955 | -7.6432415045369   | -1.8107265956902  | H 1.29778867460017   | -7.88467791750752  | -7.88467791750752 |
| H -0.4219047085454   | -6.78959146730704 | -1.08614386463454  | C -8.80957448933074  | -7.44455380059596  | -0.0608077770918  | H 4.18219452789249   | -4.9850956582821   | -5.51230239494517 |
| C -2.1680078869608   | -0.41888181261369 | -7.70721340997480  | H -4.2510714915028   | -0.12558741953599  | -7.45274497979298 | C 3.23980404301356   | -9.3287840828973   | -7.44041213805252 |
| H -0.8802144486655   | -1.00943100756191 | -6.66074124003204  | C -1.43994158717310  | -8.12558741953599  | -7.23015903358928 | C 1.59720750099742   | -3.61384109477010  | -5.78014589060137 |
| H -1.7396445029346   | -7.15177371787560 | -0.46128111480871  | C -1.1164865384508   | -7.2122444169351   | -2.03876021869845 | C 3.6100138203325    | -2.31935078794884  | -8.28503435810047 |
| H -0.50214117945127  | -6.57745546063616 | -1.088897173051292 | H -2.1099413177310   | -7.0775922927310   | -0.28224031598535 | C 1.6576290942690    | -4.890115447831538 | -1.50879644636290 |
| C -4.4564399591900   | -5.8591083426646  | -2.15210037800345  | C -0.59907307737405  | -6.1426042173664   | -2.07603726946578 | C 4.05235165160039   | -8.060113416004613 | -0.81402101133649 |
| H -1.04661650494843  | -7.27739385126067 | -1.15126057106621  | H -1.92591071623231  | -6.49695112840066  | -0.50830878159358 | C 2.784413095950241  | -6.58085634499820  | -5.90615654851351 |
| H -4.5334797327033   | -2.16698263143612 | -6.63489839042965  | H -2.10357997724091  | -5.5410666578839   | -6.44085412566608 | C 0.3238009278302    | -6.8407188060454   | -5.3785259150105  |
| H -4.2483870143203   | -1.2119924697893  | -7.08615040095805  | C -5.3008287604969   | -2.85067997436782  | -7.24634626881213 | H 2.41419851127155   | -1.7666802052717   | -7.12254904529197 |
| H -0.869173829731    | -6.1153775256828  | -2.1574698695086   | H -0.4831791380637   | -6.37904215018704  | -2.28371352751676 | H 4.36110211788442   | -6.6898926302161   | -6.81056273881929 |
| H -0.0194436067181   | -0.9203843567911  | -1.15069420324014  | H -1.8916130798349   | -6.9984422012490   | -3.1591531811512  | C 1.52103386626185   | -7.4611348644429   | -6.81076316376716 |
| H -4.791962581494    | -1.8405793983156  | -2.5774469854005   | C -2.074892517901808 | -8.29292817901808  | -8.29292817901808 | C 2.9673408625992    | -8.936408025992    | -1.2402513178866  |
| H -4.5345659529374   | -7.5129332177686  | -7.0448247683822   | H -0.05871722148252  | -8.9956525128585   | -1.03861738927501 | C 2.46608304832688   | -1.8438506016187   | -8.51078021813093 |
| H -0.42252819502515  | -8.6943939573088  | -3.31651343425364  | H -2.71043938572760  | -8.43925112970255  | -0.00653979763711 | H 0.7936876295320    | -8.26146792987482  | -8.62461382879054 |
| H -4.48517187094536  | -7.96341122100899 | -0.4751390239048   | H -0.845141079443256 | -8.1358449923182   | -1.01572097269277 | H 4.5048578801872    | -8.566049802038    | -0.8313961740457  |
| C -3.2458068024294   | -6.5888216036506  | -4.04758355447053  | H 4.0091834768607    | -8.3858122423502   | -1.1294441533656  | H 2.6226262343325    | -5.7465844566368   | -7.0422593583788  |
| H -0.9841808443129   | -5.51623501666774 | -7.22475201666774  | H -0.27338349312124  | -8.003226365318    | -8.70804035014699 | H 4.13813714493042   | -5.3950922936586   | -7.85836207403122 |
| H -0.6866277692486   | -2.5345070049042  | -6.66472581277617  | H -2.1430784244974   | -0.2997202944702   | -9.47008340007908 | H 0.88477610163030   | -2.8490168321013   | -7.92892067588129 |
| H -1.575900601217    | -7.27739385126067 | -1.0822259629257   | H -0.6904384643830   | -6.2358308707377   | -8.3583087152586  | H 1.08427317687415   | -4.5733137687415   | -3.61384109477010 |
| C -3.4880078790132   | -8.6428546357876  | -2.8525466357876   | H -5.9729855768079   | -9.82249978505538  | -0.74408509315205 | C 4.5888630867432    | -8.3583087697432   | -8.3583087697432  |
| H -0.3550486703061   | -8.9206626737735  | -2.3679786550308   | H -2.17307921783260  | -9.25243405005418  | -0.1113037079594  | H 3.0298188328489    | -1.47776053371149  | -8.06756275238058 |
| H -0.1742982604789   | -7.1273428606478  | -3.4002553008185   | H -0.1601453964605   | -8.3543535252711   | -3.06342704708181 | H -0.1742982604789   | -7.1273428606478   | -3.4002553008185  |
| H -4.45192334842086  | -8.2323553737369  | -3.45941394068490  | H -0.0547069089491   | -8.52002267098094  | -9.62491089517485 | H 0.8864184005964    | -8.7541581994556   | -0.0237212418239  |
| H -1.23572384049976  | -7.1254122100899  | -8.73250279799290  | H -0.10175094982427  | -8.5062929044024   | -1.3158449944024  | H -1.23572384049976  | -7.1254122100899   | -8.73250279799290 |
| H -1.0847660524917   | -2.3735350110898  | -7.2891266347789   | H -0.1878026078871   | -8.08095915646132  | -1.08095915646132 | H -1.0847660524917   | -2.3735350110898   | -7.2891266347789  |
| H -1.3460112129283   | -3.3905743823164  | -7.61653741809585  | H -0.5427445416125   | -2.38501436879518  | -8.6660030705169  | H -1.3460112129283   | -3.3905743823164   | -7.61653741809585 |
| H -3.858512945991    | -3.854292475322   | -6.6157940387200   | H -2.2662470406319   | -1.77310205313725  | -9.4114176349004  | H -3.858512945991    | -3.854292475322    | -6.6157940387200  |
| C -3.5194219083201   | 2.93074701061988  | -8.41234840900425  | H -2.87130828502079  | 2.68457876607511   | -9.4302162005476  | H -3.5194219083201   | 2.93074701061988   | -8.41234840900425 |
| H -3.50416663187547  | -9.12674929861072 | -1.56328642387281  | H -1.88994507973431  | 1.62571963090394   | -0.24466946855265 | H -3.50416663187547  | -9.12674929861072  | -1.56328642387281 |
| H -1.02149345485514  | -3.8789278236145  | -8.94869652788341  | H -2.65377985790129  | 9.1068798790129    | -0.3107239000     | H -1.02149345485514  | -3.8789278236145   | -8.94869652788341 |
| H -2.80867432196277  | 9.2524123564449   | -3.93787321201505  | H -8.1879421959392   | 10.24313522797386  | 1.9203321046691   | H -2.80867432196277  | 9.2524123564449    | -3.93787321201505 |
| H -1.392456169971190 | -4.10959455349585 | -8.95572900890016  | H -1.57985379158960  | -1.99887381528979  | 10.39142086573104 | H -1.392456169971190 | -4.10959455349585  | -8.95572900890016 |
| H -0.69355818014390  | -2.42584940758209 | -9.13756858923332  | H -1.38146132920738  | -0.1085168251085   | 9.68875746787835  | H -0.69355818014390  | -2.42584940758209  | -9.13756858923332 |
| H -2.2622860806145   | -3.9610787979612  | -3.96156911876003  | H -1.44662334132421  | -10.305132931903   | -1.86615487215528 | H -2.2622860806145   | -3.9610787979612   | -3.96156911876003 |
| H -2.779547902423    | -6.5384879259828  | -2.779547902423    | H -2.779547902423    | -6.5384879259828   | -2.779547902423   | H -2.779547902423    | -6.5384879259828   | -2.779547902423   |

7

|                      |                   |                   |                    |                   |                   |                     |                   |                   |
|----------------------|-------------------|-------------------|--------------------|-------------------|-------------------|---------------------|-------------------|-------------------|
| C 0.1349664833160    | 1.37300741178482  | -2.91799816717040 | C 0.0725400000     | 1.511215000       | -2.709361000      | C 0.12649494968451  | -2.20397596684892 | -2.14449742981377 |
| C -0.9640553260351   | 1.43256975556045  | -3.7745061338643  | C -0.1012290000    | 1.647561000       | -3.575949000      | C -2.9165804223071  | -2.4330682252493  | -3.575949000      |
| C -1.54968017641207  | -2.16480128833959 | -4.30203150718798 | C -1.6111410000    | 0.539340000       | -1.948300000      | C 1.77184162363086  | -1.47036126394399 | -3.78995162214336 |
| C -1.0066260843520   | -0.96840802493114 | -3.69038074853117 | C -1.0869900000    | 0.372460000       | -0.932821000      | C 1.06864492963581  | -2.5377016416035  | -3.91144406989268 |
| C 0.11964562245537   | -1.06115641755320 | -1.14676558544161 | C -0.0291390000    | 0.490082000       | -1.039129000      | C -0.07771552677023 | -0.6440646067023  | -1.039129000      |
| C 0.63202101555191   | -0.11628824246719 | -2.61071990935337 | C 0.5426470000     | 0.229048000       | -2.478167000      | C -0.0509794311413  | -0.98597498917627 | -2.29918072231000 |
| H -1.474682626216129 | 2.66003842761429  | -4.10414320005147 | O -1.4935880000    | 2.901491000       | -3.834909000      | O 1.9968133455203   | -6.60080797282463 | -8.1616248708173  |
| H -1.6196033738996   | -2.0653326788873  | -4.50767908818732 | O -1.7120940000    | -1.787191000      | -4.549010000      | O 1.61450084931200  | 0.6521474645458   | -4.78858326235589 |
| H 1.4877847584131    | 2.95457452787814  | -0.7972136149078  | C 0.6659220000     | -2.264680000      | -2.902854000      | H -1.4877847584131  | -2.0653326788873  | -4.50767908818732 |
| C 0.7754373684258    | -2.39572869269084 | -8.7373760548934  | C -0.1178900000    | -2.947488000      | -1.667435000      | C -0.85821751305443 | 1.28634875464283  | -1.26958356457909 |
| C 0.206022932367     | -0.98236045001905 | -1.56328642387281 | C -0.9259580000    | -3.868187000      | -1.760807000      | C -0.3577147643278  | 2.35034943360878  | -2.3813742374201  |
| C -0.0069999970267   | -3.8781919946116  | -1.62223739194057 | C -0.9259580000    | -3.868187000      | -1.760807000      | C 0.56367801339773  | 3.31453298899879  | -2.81056262735061 |
| H -1.4308486719577   | -3.854292475322   | -6.6157940387200  | C -0.9255070000    | -4.192813000      | 0.602015000       | H -1.4308486719577  | -3.854292475322   | -6.6157940387200  |
| C -0.9008926957855   | -4.0687439869090  | 0.7793619549732   | C -0.9255070000    | -4.192813000      | 0.602015000       | C 0.50392872826646  | 3.43018511350340  | -0.6428205390670  |
| C 0.9659525879903    | -2.017628246774   | 0.87096650509468  | C -0.9255070000    | -4.192813000      | 0.602015000       | C 0.357902710116561 | 3.3980271030623   | -1.0777776380490  |
| C 0.6969288902954    | -2.0653326788873  | -4.50767908818732 | C -0.6204450000    | -2.685720000      | -4.001321000      | H -1.78981893977488 | 0.4343274645458   | -1.9577276497934  |
| C 1.5561742383286    | -2.3546723246662  | -2.89899292058504 | C -0.1154719000    | -2.931212000      | -0.303212000      | C 0.9351879990986   | -1.2597046949986  | -1.2597046949986  |
| H 1.5112190235290    | -1.9684494799919  | -0.25496384642069 | H 1.4395454000     | -1.989524000      | -0.401739000      | C 1.60473197906251  | 2.64637300719330  | -7.0003203176602  |
| C 0.8450208643100    | -2.8794819988780  | 2.2045126098720   | C 0.7932545000     | -3.025173000      | 2.097789000       | C -0.86768540013282 | 3.43404614687904  | -1.2038661907400  |
| C 0.2462160462099    | -1.61835921650368 | 2.78918426012346  | C 0.6144790000     | -1.810850000      | 2.746879000       | C -0.1001450927182  | 1.1592776905312   | 2.1592776905312   |
| C 0.823244184929264  | -3.6608821272474  | -3.6608821272474  | C 0.9618245000     | 3.610904000       | -3.610904000      | C 0.12760105846867  | 2.09724405846867  | -2.09724405846867 |
| C -1.41603735342976  | -0.55661060118407 | 4.2252976544828   | C -1.5521100000    | -0.872810000      | 4.211322000       | C 1.06892551129624  | 2.03463475408292  | -3.73479056004290 |
| C 0.90928229884585   | 0.7006198848585   | 3.87647003348289  | C -1.0646010000    | 0.410471000       | 3.954790000       | C 1.2460203517480   | 0.71167015234702  | 3.8764717440330   |
| C 0.1882790431300    | 0.8150330332304   | 0.30123255698123  | C 0.0560620000     | 0.001166000       | 3.130345000       | C -0.11749888601454 | 0.26431047783773  | 3.1357189591304   |
| C 0.70760287180277   | -0.5517740221559  | 2.46650650698231  | C 0.0675180000     | -0.518370000      | 2.597325000       | C -0.50708084115968 | 1.16016717100741  | 2.3238477868684   |
| C 1.29656001039424   | -0.875927748891   | 3.8517175233000   | O -0.23175233000   | 3.8517175233000   | 3.8517175233000   | C 1.52708986132620  | 1.52708986132620  | 1.52708986132620  |
| O -1.5265132106119   | 1.7839232050156   | 4.43514039519202  | O -1.7748020000    | 1.446111000       | 4.562416000       | O 1.93977204257348  | -0.0888215560190  | 4.73554782734924  |
| H 1.5409133404460    | -0.2641842936256  | 1.7849940886699   | H 1.4576040000     | -0.373625000      | 1.870083000       | H -1.38743956660167 | 0.8280818682457   | 1.7311508211000   |
| C 0.8086355917125    | 2.16206196171838  | 2.6903481935155   | C 0.6647940000     | 1.977531200       | 2.929346000       | C -0.4024758353987  | -1.3849698253738  | 3.869741480049    |
| C 0.19150230853264   | 1.434293828201    | 1.434293828201    | C 0.6647940000     | 1.977531200       | 2.929346000       | C 0.16798911513678  | 1.6798911513678   | 1.6798911513678   |
| C 0.19150230853264   | 1.434293828201    | 1.434293828201    | C -0.9801700000    | 3.551471000       | 1.817707600       | C 1.23575783810933  | -2.19697405935452 | 2.7475248219400   |
| C -1.05325189613563  | 1.05325189613563  | 0.3851529179180   | C -1.5442530000    | 1.479318000       | 0.706877000       | C 0.1370059567261   | -3.8630578008865  | 1.8518214250160   |
| C 0.10260464506691   | 3.8013595548297   | -0.87452392780666 | C -1.0297040000    | 3.875038000       | -0.563962000      | C 1.26982480104857  | -3.26982480104857 | -3.26982480104857 |
| C 0.8182112814090    | 2.245776742476    | 2.245776742476    | C 0.9982112814090  | -2.245776742476   | -2.245776742476   | C 0.1671320851123   | -0.1671320851123  | -0.1671320851123  |
| C 0.6470083634694    | 2.245776742476    | 2.245776742476    | C 0.5036270000     | 0.4061000         | 0.429674000       | C -0.52463093044478 | -0.2337609798579  | 1.0357262978705   |
| O -1.35982197749823  | 3.9506454714002   | 0.716524067197011 | O -1.4306500000    | 3.809556000       | 3.908784000       | O 1.1777690123272   | -2.8085077174633  | 4.0357398991054   |
| O -1.6390713370991   | 1.43905325132347  | -1.954724800668   | O -1.4977250000    | 4.496470000       | -1.621737000      | O 1.17519980210487  | -4.8269622320382  | -0.3470042723868  |
| H 1.4099970745581    | 1.7540587853639   | 0.0840657393254   | H 1.1779390000     | 1.708457000       | 0.318521000       | H 1.14717498512014  | -0.5899138062675  | 0.8076687707321   |
| C 0.72401136707900   | 1.9349135617800   | 2.245776742476    | C 0.72401136707900 | 1.9349135617800   | 2.245776742476    | C 0.23894947728930  | -0.23894947728930 | -0.23894947728930 |
| C 2.30774761835642   | -2.30883967325836 | -2.8705885806633  | C 2.2111280000     | -2.226566000      | -2.957412000      | C -2.3771402468105  | 1.09853941639127  | -3.28622101461141 |
| C 2.3764553876424    | -2.87048060770276 | 2.11582770280742  | C 2.2343300000     | -2.978772000      | 2.024604000       | C -2.38824003017519 | 3.28644667374867  | -1.3545838803467  |
| H 0.59684180179320   | 1.69435016286393  | 2.88420310958578  | H 0.5969130000     | 3.387858600       | 2.737329000       | H 0.5969130000      | 3.387858600       | 2.737329000       |
| C 2.34267893631454   | -2.34267893631454 | -2.34267893631454 | C 2.34267893631454 | -2.34267893631454 | -2.34267893631454 | C 2.34267893631454  | -2.34267893631454 | -2.34267893631454 |
| C 0.55157842838594   | 2.894333675014    | 0.3579861451496   | C 0.9312210000     | 2.578651000       | 3.795423000       | H -0.1032926218895  | -1.1469739548209  | 4.37348218852100  |
| C 2.58386305289270   | 2.6774173631511   | -2.3069929694389  | C 2.2188510000     | 3.712846000       | -1.968848000      | C -1.9520870076996  | -3.32289897076996 | -1.9520870076996  |
| H 0.4401209874047    | 3.5564189672136   | -3.0246273671098  | C 0.4401760000     | 3.558875000       | -2.703294000      | C 0.1050378464782   | -0.23094842823204 | -1.6039171474936  |
| C 2.57840848957208   | 1.654545450881    | -2.508086000000   | C 2.57840848957208 | 1.654545450881    | -2.508086000000   | C 2.57840848957208  | 1.654545450881    | -2.508086000000   |
| C 1.6986642803619    | -1.897803865452   | 1.897803865452    | C 2.6473800000     | -6.68781000       | 2.066470000       | C 0.0802598677019   | 2.08102598677019  | 2.08102598677019  |
| C 3.0313845860000    | -1.61871294177654 | -1.811571980852   | C 2.7683430000     | -2.941762800      | -1.478821000      | H -2.8317546829948  | 7.289025266272    | -3.4857739168688  |
| H 2.6649448891026    | -3.6450881595475  | 1.3958655187852   | H 2.6266460000     | -3.709472000      | 1.251084000       | H -2.8396712090875  | 4.00553328842220  | 0.685488242946    |
| C 0.7549059091905    | 1.95875928359604  | 1.7061786673734   | H 2.6667880000     | -2.013365000      | 1.627136000       | H -2.8396712090875  | 4.00553328842220  | 0.685488242946    |
| C 1.10907117347578   | 2.523091452528    | 2.523091452528    | C 1.3716880000     | 2.523091452528    | 2.523091452528    | C 1.10907117347578  | 2.523091452528    | 2.523091452528    |
| H 2.6485087000000    | 1.3920908941478   | 4.5464666113871   | H 2.4929520000     | 1.185858000       | 3.684330000       | C -2.6187593729070  | -0.3384190573840  | 4.48246236339294  |
| C 2.71448380152697   | 1.7019248147215   | 3.7654224272757   | H 2.5967610000     | 1.584769000       | 1.995632000       | C -2.05935475272589 | -0.3390779272589  | 4.2949336930414   |
| C 3.10494594992205   | 3.42723120432589  | 2.97212392703015  | C 2.8914200000     | 3.247040000       | 3.323348000       | C -2.2548708316037  | -2.2548708316037  | 3.5956289845459   |
| H 5.40494349722700   | 3.4252095903864   | 1.5962467161697   | C 2.5144650000     | 3.466710000       | 1.245474000       | C -1.22487407073753 | -1.22487407073753 | 3.5956289845459   |
| C 2.6595083552165    | 1.595494094130    | 1.595494094130    | C 2.5144650000     | 3.466710000       | 1.245474000       | C -1.22487407073753 | -1.22487407073753 | 3.5956289845459   |
| C 2.964395168486     | 2.9872159029828   | -3.658177326756   | C 2.9501250000     | 3.050303000       | -3.287430000      | C -2.2971395674017  | -3.4547013138558  | -2.2269570878347  |
| C 0.759756998103     | -0.3739953430084  | -3.64722784979881 | C 0.3630630000     | -2.817212000      | -3.751944000      | H -0.26863477632358 | 1.66092067269129  | -3.4492384941731  |
| H 1.91258911779194   | -0.5789604144565  | -3.6885482500297  | H -1.9179910000    | -4.677317000      | 2.979676000       | C 2.88253074469791  | 2.88253074469791  | 2.88253074469791  |
| H 1.8593066919057    | 2.51859306691905  | 2.51859306691905  | H -1.9634900000    | -4.677317000      | 2.979676000       | C 2.9774887575998   | 2.9774887575998   | 2.9774887575998   |
| H -1.4083524781960   | 2.5818861042688   | 3.8761802875963   | C 1.5427570000     | 2.288260000       | 4.088439000       | C 1.3971367051849   | 1.1587907919159   | -4.2931641321263  |
| H -1.939905533349    | 4.786414272328    | 2.62160949071495  | C -1.2278450000    | 3.35510000        | 3.068308000       | C 1.2479517072816   | 1.0527700418895   | 1.929613266205    |
| C 1.5239760189498    | 3.7851813467582   | 2.74980690927185  | C -1.5168320000    | 4.368180000       | -2.490626000      | H 1.78452134718635  | -1.02747154509939 | 4.52320209161     |
| C 2.068274132121     | 2.068274132121    | 2.068274132121    | C -1.803217490900  | -4.7894603500929  | -4.7894603500929  | H 2.54024942501461  | 2.54024942501461  | 2.54024942501461  |
| O -1.4935430238584   | -4.62657368200276 | 1.8760991703538   | O -1.4840270000    | -4.831221000      | 1.685486000       | H 2.2942684925195   | -0.5001620542618  | 2.0598636842164   |
| H -1.4666661632994   | -2.860792682584   | -3.95353800504315 | H -1.549155000     | -2.610533000      | -0.859329000      | C -1.9519312766322  | -4.599932972664   | -1.9381335605403  |
| C 1.29350377204419   | -0.46015098229289 | 2.6693396474000   | C -1.3860330000    | -2.429989000      | 2.501865000       | O 0.9349901904557   | 5.30244277101004  | 0.2631779054201   |
| C 2.7657086145616    | -4.7203154962619  | -2.1581196463871  | C 2.5624170000     | -4.46570000       | -1.08672000       | C 3.081130862449    | -1.7044768081027  | -0.6712986540912  |
| C 4.5241072944579    | 3.354772469128    | 3.3712466211757   | C                  |                   |                   |                     |                   |                   |

|   |                    |                   |                    |   |              |                  |              |   |                   |                    |                    |
|---|--------------------|-------------------|--------------------|---|--------------|------------------|--------------|---|-------------------|--------------------|--------------------|
| H | 4.77734410617415   | 2.43385574353509  | 3.84256442718311   | H | 4.5798129000 | 2.232665000      | 4.236071000  | H | -2.5278240617913  | 2.68258169247151   | 3.39669760272317   |
| H | 5.07374652746659   | 4.10581931466280  | 3.36769006026580   | H | 4.89812000   | 3.99741400       | 8.22227000   | H | -2.381254308488   | 2.02738651809279   | 3.367361437390     |
| H | 7.1017274742563    | 4.7833530864170   | 1.91653382572254   | H | 1.604279000  | 4.46441900       | 2.25592000   | H | -2.25663981190775 | 2.3833880309914    | 0.70738388037670   |
| H | 3.05927980457723   | 4.21053827856817  | 0.95218182539782   | H | 2.999240000  | 4.10694700       | 1.338361000  | H | -4.97701631706214 | 3.94364639877040   | 2.09408354702041   |
| H | 3.52153598073821   | 5.42635009670008  | 2.20272080251974   | H | 3.202600000  | 5.27334000       | 2.647370000  | H | -4.70979874103227 | 2.21518406285880   | 2.20489024070293   |
| H | 5.51373082594683   | -2.3453958306055  | 2.81192041841301   | H | 4.951624000  | -2.412621000     | 2.700415000  | H | -4.97128314272557 | 3.25243454268087   | 3.71312085164887   |
| H | 4.81645471403233   | -4.04605148328424 | 2.39051633204024   | H | 7.917860000  | 2.22457000       | 4.21400000   | H | -4.59253985742108 | 1.59253985742108   | 4.514523962408059  |
| H | 5.1446472360589    | -3.57599022638300 | 4.06368499019021   | H | 5.120436000  | -3.684923200     | 3.905535000  | H | -3.0172795344222  | 5.06896273545326   | 2.70987179861624   |
| H | 1.79759636204443   | -2.1214725448738  | 4.80867492231189   | H | 1.747117000  | -2.343513000     | 4.729376000  | H | -3.14948197849166 | 4.91863704349644   | 4.32452371030917   |
| H | 3.13664320554413   | -1.15757309486835 | 4.21071608587365   | H | 3.040129700  | -1.236315000     | 4.164451000  | H | -4.50110573399929 | -0.26358900100663  | 3.40313759593067   |
| H | 3.42406339888074   | -2.40950746308949 | 5.41982431232020   | H | 1.384144000  | -2.60348000      | 5.316841000  | H | -4.2865531088112  | -1.5202838891619   | 4.63770040720562   |
| C | -2.77523413566943  | 0.38573193730241  | -1.563404303202988 | C | -2.825337700 | 0.72854300       | -5.047704000 | H | -4.63322306145396 | 0.16486464730511   | 5.10845890295743   |
| C | -5.26244753203544  | -5.62044584138524 | -0.57778413078502  | C | -2.575374000 | -5.49916000      | -0.73215000  | H | -2.24557005275953 | -1.68193774847083  | 6.1423882582545    |
| C | -2.6077338836212   | -0.69240635840364 | 5.12939911524640   | C | -2.762672000 | -1.08698400      | 5.04261000   | H | -1.05583927188712 | -0.38839038376977  | 6.00969609288319   |
| C | -2.70821460850024  | 5.030624256450    | 0.53020560253101   | C | -2.166154000 | 5.114161000      | 0.817464000  | H | -2.6585642851077  | -0.0389201908538   | 6.62395397734717   |
| N | -2.46618822935853  | -1.8465912235853  | 6.03460144328061   | N | -2.026572000 | -2.294161000     | 5.907133000  | H | -4.4431487683144  | -3.37583954297331  | -0.10071330629083  |
| N | -1.4387049233126   | -1.62163858545499 | 7.0557699462680    | N | -1.630281000 | -1.21325700      | 6.973841000  | H | -4.42964845803568 | -4.56069743256413  | -1.40418518026744  |
| N | -2.50000037400393  | -6.23853889447811 | -1.72998657366985  | N | -2.109774000 | -6.88149600      | -0.67394900  | H | -4.53102553368659 | -5.0968864457450   | 0.27019575454632   |
| N | -1.46802961959594  | -7.25780887759121 | -1.51681957322158  | C | -2.221732000 | -7.81139600      | -0.53804800  | H | -2.25073235796238 | -6.0242250249513   | -1.7573569896109   |
| N | -2.69807895896276  | 1.54865774310090  | -0.60473533222049  | N | -2.709314000 | 1.91454500       | -8.57596000  | H | -0.9851686989078  | -5.92301413861049  | -0.5162000917860   |
| H | -5.444994375754    | 1.35774032817344  | -1.72687479040535  | C | -1.717087000 | 1.78452000       | -6.944455000 | H | -2.55863498985190 | -6.57924975752841  | -0.436018727253    |
| H | -2.57316298640804  | 3.95348954974064  | 1.68449525580610   | N | -2.204452000 | 6.555428000      | 0.377531000  | H | -4.71299177053283 | -0.29345498849454  | -0.08518252111739  |
| H | -1.56459122761977  | 6.97511637751138  | 1.84547528755364   | C | -3.232643000 | 7.49707500       | 0.611785000  | H | -4.94958617791214 | 0.9469332988137    | -3.1449263175412   |
| H | -3.6552970080363   | 0.5307502082723   | -4.5346608585639   | C | -3.706483000 | 0.8630200        | -4.41053000  | H | -4.88624464003039 | -0.7509787804117   | -4.778084739526    |
| H | -2.9398332645930   | -0.5339124945927  | -5.72645347220256  | H | -3.008331000 | -0.15072400      | -5.66660000  | H | -2.94697800102871 | 1.46922956533420   | -5.97396813265325  |
| H | -5.32395247345851  | -0.73427099379491 | -0.7450004100189   | H | -3.59187000  | -5.33463200      | -1.632929000 | H | -1.53260186405902 | 0.8132557590834    | -9.51504360640963  |
| H | -2.7775979124946   | -5.8866647467325  | 0.3467582585134    | H | -3.247134000 | -5.34968900      | 0.110935000  | H | -3.08223586420402 | -0.22890551075389  | -0.4263532776410   |
| H | -3.59405022981946  | -0.0571611011026  | -1.640440000       | H | -1.640440000 | -0.0571611026    | -1.640440000 | H | -2.03690572783659 | 3.33353589902718   | 0.1263660079518    |
| H | -2.77784170011026  | 0.23652276727273  | 5.6921728716698    | H | -2.965604000 | -5.2167000       | 5.690356000  | C | 3.93526528895959  | -2.06975642032742  | -6.79482382947626  |
| H | -3.5947195051572   | 4.4189778257863   | 0.7145695941123    | H | -3.527848000 | 5.01104600       | 1.735430000  | C | 1.79895857510652  | -0.86214872728675  | 2.27061377728219   |
| H | -2.89308025727293  | 5.59200664827260  | -0.3965793132430   | H | -3.352776000 | 5.01147800       | -0.00689100  | H | -4.16110274746570 | -6.805483666840    | 1.6318653231431    |
| C | -3.84491936514059  | 5.64898499670595  | 2.067496051059     | H | -1.369128000 | 1.86341000       | 1.86341000   | H | 2.93193496316404  | 6.358724236195     | 4.2387466079518    |
| C | -3.7305340899140   | -2.2181625058793  | 6.6694202881891    | C | -3.894114000 | -2.73769000      | 6.474122000  | C | 0.58934979076377  | 6.57219150487286   | -3.9142309515786   |
| C | -3.7696732370900   | -6.87607473668135 | -2.07782244922439  | C | -1.293511000 | -2.75189700      | -1.819777000 | C | 3.80185904445463  | 2.55904071286223   | 6.699021035725     |
| C | -3.99480174039047  | 1.89319108599308  | -6.64710914082904  | C | -3.992588000 | 2.33936900       | -6.440862000 | C | 3.6711817224003   | 3.9690064118139    | 6.28904966272851   |
| H | -1.423598639990214 | 5.95920621265838  | 0.59290621265838   | H | -3.813722000 | 8.89561900       | 0.04381000   | H | -3.10323246940041 | -5.5682366491591   | -0.2387466079518   |
| C | -6.60495226212134  | 3.9139291193856   | 3.05703767980965   | O | -1.995317000 | 9.27449500       | 1.575454000  | H | 7.64283083996284  | -1.1558771405756   | -5.7108048070007   |
| C | -3.64624084371665  | 7.42324834959212  | 3.28535262925309   | C | -0.900257000 | 3.86842900       | 1.703693000  | H | 4.41341910050753  | -1.09103651697724  | -6.3712359092033   |
| C | -1.29318715726078  | -2.85390190926774 | 7.91663672344866   | C | -1.480660000 | -3.39353600      | 7.754794000  | H | 4.6574969615055   | -2.81481589366174  | -6.41792125437941  |
| C | -1.52477268734240  | -3.21046055198166 | 8.53452331988166   | C | -2.74412000  | -3.38195020      | 8.309395000  | H | 0.85587497054363  | -6.31813199053442  | 2.1942106595891    |
| C | -3.5270275140828   | -3.434717512490   | 7.54422198626966   | C | -1.028614000 | -1.028614000     | 7.27597000   | H | -0.980854521746   | -0.980854521746    | 3.349987178040     |
| C | -2.327172859924    | -1.82523296798750 | -2.7465658947222   | C | -0.708214000 | -9.22713500      | -0.420117000 | H | 4.86255846448372  | -6.2320258667467   | 1.042738828148372  |
| C | -2.58157158800127  | -8.74567428309726 | -3.07947420579018  | C | -1.903287000 | -9.58913600      | -1.542578000 | H | 4.47377700798874  | -6.9196425982156   | 2.66128475982156   |
| C | -3.8504188013557   | -7.757178188694   | -4.29263610820782  | C | -0.81471800  | -8.67863200      | -1.680521000 | H | 3.29297996170167  | 7.2595164990546    | -3.90277720737863  |
| H | -1.62357268807759  | 7.9805256477516   | 7.9805256477516    | H | -1.59441000  | -1.59441000      | 7.42421000   | H | 5.67496794815278  | 5.67496794815278   | 5.67496794815278   |
| C | -3.85521474745637  | 3.1213586083027   | -7.51803734379141  | C | -3.811467000 | 3.63170700       | -2.752742000 | H | -0.2659752458791  | 0.0450452829840    | -3.4957313420277   |
| H | -0.9606683788857   | -0.7581269021954  | 7.6784056690169    | H | -1.937703000 | -1.2989500       | 7.641693000  | H | 0.7487545006596   | 7.38259045746727   | -3.7829394581871   |
| H | -0.4934941106290   | -0.4016343849239  | 6.5625112307363    | H | -0.676251000 | -1.83900100      | 6.526765000  | H | 0.9012605120919   | 2.1213027194426    | 6.26220644662975   |
| H | -1.71947471084423  | -7.8585187431415  | 0.645512307363     | H | -1.909132600 | -1.909132600     | 3.99913000   | H | 4.11800810054895  | 1.8630510054895    | 1.8630510054895    |
| H | -0.5196709303920   | -0.76268398584834 | -1.31540271323243  | H | -3.971169000 | -7.55914600      | 0.356123000  | H | 0.91260597462972  | 6.5810370216768    | 5.5435335675076    |
| H | -0.974056886510    | 0.4932920673324   | -7.7471092063478   | H | -0.206942000 | 0.96626500       | -7.614517000 | C | 3.25890660613475  | 4.8177230868340    | 4.74643783927132   |
| H | -1.9740568836318   | -0.6724077288269  | -6.6724077288269   | H | -0.757121000 | -1.25779500      | -6.499648000 | H | 1.739292792748422 | -3.6167627048423   | -5.8100110314040   |
| H | -1.85876315240626  | 3.5353565234369   | 0.59290621265838   | H | -3.996175000 | 7.42313600       | 1.484136000  | H | 3.61051567380059  | -2.37940578066417  | 5.2387466079518    |
| H | -0.61309277079181  | 4.0984113205153   | 1.22551563703151   | H | -0.502776000 | 6.28420100       | 1.915043000  | H | 3.97284142083717  | -8.15498393084528  | 0.9763636872062    |
| H | -4.5617209955610   | 5.7608583559160   | 2.2970997720645    | H | -1.917821000 | 6.84613900       | 2.819185000  | C | 2.58189554518358  | 6.726373745877     | -5.88951927816472  |
| H | -4.2466114040150   | 7.1445399177666   | 1.24038142569300   | H | -4.953136000 | -2.93037400      | 5.661229000  | H | 3.61565765781028  | 6.9294992735623    | -5.3596929208156   |
| H | -4.1191514402314   | 1.3854591758289   | 7.270681775809     | H | -1.323989000 | -1.323989000     | 7.13812000   | H | 7.162293517841953 | 7.162293517841953  | 7.162293517841953  |
| H | -4.50458875730615  | -6.10214021750314 | -2.29660764052027  | H | -0.430363000 | -6.59008500      | -1.878719000 | H | 4.4060067380532   | 3.2093232043964    | 6.62595486405972   |
| H | -1.4464448915285   | -7.47297660957581 | -1.23621564174731  | H | -1.858562000 | -7.15047000      | -2.763293000 | O | 1.436791505400224 | 5.9757930880959    | 5.9757930880959    |
| H | -4.7005878809684   | 2.09494089306995  | -5.84214200959510  | H | -4.693053000 | 2.55317000       | -5.626964000 | O | 2.92739807605914  | 3.62409474925392   | -8.37096361793443  |
| H | -4.3856817455428   | 1.9570420492985   | 2.40336968629407   | H | -0.463332000 | 2.40336968629407 | -0.463332000 | H | 0.89946417882886  | -8.91466464178828  | -8.91466464178828  |
| H | -5.2745240681682   | 6.64827237646585  | 2.5053968668138    | H | -3.648372000 | 5.95834500       | 0.442388000  | O | 2.55799069023300  | 4.06114802075814   | 8.44899756992835   |
| H | -0.97405688362646  | 7.22807921482344  | 3.5197191097923    | H | -2.242450000 | 8.89910000       | -0.460883000 | H | 0.95123398525064  | 2.8752757504485    | 8.65000236562720   |
| H | -1.45713318542530  | 7.93597257307415  | 3.5660626140723    | H | -0.336103000 | 8.86439200       | 2.578886000  | H | 0.70633812406279  | 4.1980333592475    | 7.53002358290074   |
| H | -3.347486357344    | 8.8012945253534   | 4.1382494253534    | H | -1.252456000 | 8.8012945253534  | -1.252456000 | H | 4.1630210715896   | -2.862513975015896 | -2.862513975015896 |
| H | -0.92818371958054  | -5.68976385       |                    |   |              |                  |              |   |                   |                    |                    |

|   |                   |                    |                    |   |                    |                    |                     |   |                    |                    |                    |
|---|-------------------|--------------------|--------------------|---|--------------------|--------------------|---------------------|---|--------------------|--------------------|--------------------|
| C | 2.486245188395699 | -4.65963870940859  | -1.94032044266777  | C | 2.76558001106383   | -4.49836710938585  | -2.6128880281965    | C | 2.91078078519771   | -1.72970495991077  | -4.67665681301802  |
| C | 4.60298497922954  | -3.3181504221416   | -3.15511876633064  | C | 4.46145525402364   | -3.994091683885    | -3.6469495962099    | H | 1.27958616102099   | 1.56647980359646   | -4.5824893062466   |
| C | 4.48498491514403  | -3.1796550766880   | -3.4811546461342   | C | 3.71496521630176   | -3.74145961116739  | -4.31965246744050   | C | 2.074638672193     | 5.2513135449694    | -2.5110387396428   |
| C | 2.7111851821601   | 1.94551800015649   | -4.74016652519760  | C | 4.40631846558975   | 2.57512297244003   | -3.18917182517020   | H | 1.6655948008868    | 5.8071427375064    | -0.0585590889925   |
| C | 4.61692359203355  | 3.44583138078435   | 3.04800732426230   | C | 4.43680543858504   | 2.1581854914737    | 3.55810482516047    | N | 2.5842443624912    | -0.05820436433148  | -0.06930119085515  |
| C | 2.82152912725243  | 1.873661496753885  | 1.89365489516265   | C | 2.76106819450894   | 4.1263599124370    | 2.48823328297772    | N | 1.8137372423242    | 5.68153512140861   | -3.78980787000010  |
| C | 4.64490823070714  | -0.0449405840392   | 3.397320349347     | C | 4.39682646055379   | 2.1869555308707    | 2.82924850531025    | N | 2.50441324843759   | 3.3517884552046    | 5.7234952704444    |
| C | 2.873209271979835 | -1.871306739179835 | 4.70933596226644   | C | 2.62902751412111   | -0.60719092503400  | 4.626952716035159   | N | 2.80778611096820   | -6.08819750231382  | 1.52987830950076   |
| H | 2.735066158467277 | -3.95356564074822  | -3.94407560933252  | H | 2.59806555283080   | -3.50985598456386  | -4.5238845988237    | H | 3.50566129975901   | 4.61814096198868   | 4.618200747313201  |
| H | 2.78940098456447  | -3.88166788903474  | -4.0115208731549   | H | 2.5254386944178    | -4.06246285708002  | 3.33583797708000    | H | 3.4617284502087    | 3.1273899216282    | 3.30723758849041   |
| H | 2.75847468238611  | 4.0457324515643    | 1.9009314270044    | H | 2.5604631859971    | 3.84441742690182   | 4.3904831690001     | H | 3.8344468368772    | -2.994020278517    | 1.70215440528674   |
| H | 2.5893435260635   | 3.9591773552394    | -4.0618679986976   | H | 2.56965629225799   | 1.6831827501521    | -3.78705936060995   | H | 3.10464365958110   | -0.84332877239823  | 3.20111429258808   |
| H | 1.813589002012093 | -9.34859140466573  | -1.8802691073878   | H | 1.72593339312114   | -2.1811283664424   | -2.57330929361412   | H | 3.51513697204768   | -0.82427028817882  | -4.70287489878206  |
| H | 3.1661789660040   | -4.32100543089717  | -0.94901555982621  | H | 3.073757307476869  | -4.2603434066207   | -1.9318710565007    | H | 3.51994795708108   | -2.51996423466629  | -4.22210589838108  |
| C | 3.43587185563102  | 0.96556626210141   | -4.40220814008330  | H | 3.35815642911700   | -5.34781840623036  | -2.9539925008269    | H | 2.1861258092489    | 6.1330303182622    | -1.7675938494043   |
| H | 5.02763454930911  | -2.95146684208292  | -2.1987273840884   | H | 4.88806854338208   | -2.4203320590987   | -2.69796934154272   | H | 3.04313162407205   | -4.273668537213    | -2.41271569941202  |
| H | 4.8025788778016   | -2.5720711406549   | -3.90470213882200  | H | 4.63840637690624   | -2.165751971182    | -4.35133693528446   | C | -4.48572677252966  | 3.1599945822199    | 2.74749492193442   |
| H | 5.13745427798221  | -4.2292805742746   | -3.4042065100130   | H | 5.01018795161424   | -3.8598593309823   | -4.03448818995357   | C | -2.65794859637397  | 3.78598710058466   | 3.39813931195783   |
| H | 4.93292926240854  | 2.25558937266004   | -3.11591297031155  | H | 2.72429472980636   | 4.44141742690182   | 2.3432759979781     | H | -4.1537353599465   | -0.51628327031061  | -4.4121909283963   |
| H | 4.7027867628873   | 3.96277151271783   | -2.75450933432023  | H | 1.42896444182114   | 3.71901615467091   | -4.5490963171849    | H | -2.12987552804678  | -0.67614285956650  | 5.8864259760368    |
| H | 4.9834280384080   | 3.4401697947842    | -4.41494662473259  | H | 3.03224295846834   | 3.6476612422072    | -5.26234644996658   | C | -4.14665586421192  | -0.430773755205705 | -0.430773755205705 |
| H | 1.056235266749714 | 1.85987046396408   | -4.97066296149714  | H | 4.70104821281853   | 1.75791550746925   | -2.53006612816887   | C | -2.1401740074125   | -5.80362038954123  | -0.75793804376723  |
| H | 3.60565451570962  | 0.96556626210141   | -4.40220814008330  | H | 4.78698957300293   | 5.20328553954183   | -2.05800837023020   | C | -4.50309924067398  | 0.06126499931537   | -4.11217812922114  |
| C | 3.2392338357718   | 2.8180512417505    | -5.66487926454308  | H | 4.0346878164772    | 2.6292491216762    | -4.14779102620242   | C | -2.6325025706412   | 5.96718747373091   | -5.7248948973008   |
| H | 5.0261575856881   | 3.0872447226001    | 2.10183311805862   | H | 4.8790381883605    | 2.3440657386267    | 2.95656149612694    | H | -2.57470878808808  | -0.8358891003402   | -0.07626240503134  |
| H | 4.84901558623587  | 2.7039975468064    | 3.81243584993862   | H | 4.60058067187378   | 1.77848785045440   | -4.44190976435551   | H | -2.53793924062810  | 2.61349382350440   | 3.42112034506341   |
| H | 5.1912045750813   | 4.36737059175324   | 3.3046790594135    | H | 4.98151262268166   | 3.4738188551720    | 3.9459379494055     | H | -2.39675116985199  | 4.0162834717226    | 4.2658146312562    |
| H | 1.76652080335732  | 5.0165421893884    | 1.85991970100391   | H | 1.72209472298048   | 4.44141742690182   | 2.3432759979781     | H | -2.32123082546208  | -4.2364366804931   | 0.6703852596574    |
| H | 3.13554852830431  | 4.4151218371171    | 0.89584828558006   | H | 3.88520540527590   | 3.89858230968311   | 1.47207682549646    | H | -4.9818976281189   | 3.94891544432849   | 3.12314602234785   |
| H | 3.38425089251410  | 5.65867525218329   | 2.11402357997132   | H | 4.34949338202556   | -4.76226067297087  | 2.84945803739828    | H | -4.72286703939828  | 2.21748617103373   | 3.22663199181850   |
| H | 5.06284356898709  | -2.0319035938518   | 3.0283305241479    | H | 3.200396394060     | 2.4724602423207    | 2.57063474293797    | H | -4.91904148590089  | 3.0861524725894    | 3.74641406647873   |
| H | 4.8496883604111   | -3.811618881191776 | 2.6573011778662    | H | 4.61318881191776   | 2.0584623691916    | 2.88910528639134    | H | -4.585464646254    | -0.5962156829516   | -4.78649913265167  |
| H | 5.17721468272175  | -3.3020997635694   | 4.31206323585811   | H | 4.918950672432069  | -4.0798813805293   | 3.71513293809939    | H | -3.0086031801817   | 5.5981660606680    | 2.75802001324131   |
| H | 1.8195603064399   | -1.8268308730899   | 4.97284702059015   | H | 1.57518957461858   | -2.674039934297    | 4.53325792852381    | H | -3.14352605815664  | 4.89581942805783   | 3.46769726729305   |
| H | 3.16737079439807  | -0.87848848045891  | 4.37080456386409   | H | 2.94570087063403   | 1.67034280971633   | 4.05488435543401    | H | -4.52744730659340  | -0.2723297493574   | 3.514774813458     |
| C | 3.43587185563102  | 0.96556626210141   | -4.40220814008330  | H | 3.18207127308043   | 4.31854713080451   | -1.53973439730843   | H | -4.53743197308451  | -0.52823207622542  | -4.11217812922114  |
| C | 3.75863172559400  | 0.3114077205560    | -0.53408037256740  | C | -3.75863172559400  | 0.3114077205560    | -0.53408037256740   | H | -4.64490606997484  | 0.174276884273561  | 5.1250505688402    |
| C | -2.51916580896208 | -5.24641174340258  | -0.32069175807717  | C | -2.48805195943096  | -5.62029056740094  | -1.25549067788777   | H | -2.26891118062351  | -1.731271737390242 | 6.1313584254680    |
| C | -2.57810274552246 | -3.18516488402919  | -0.57810274552246  | C | -2.88412922086307  | -1.23260660452132  | 4.89044262344102    | H | -1.0719043542031   | -0.4438615699127   | 5.99694225071322   |
| C | -2.60236607366721 | 5.25490531235190   | 0.43520174901248   | C | -2.84477471125897  | 5.25031173371030   | 1.04379952438346    | H | -2.66966914584892  | -0.2695458912242   | 6.63021302857896   |
| N | -2.45158022321094 | -1.47214297560703  | 6.1262179583486    | N | -2.527027604616251 | -2.527027604616251 | 6.26948754091624    | H | -4.50574604646254  | -0.52866115141424  | -0.1186632965167   |
| N | -2.75353495242601 | -5.16392923542601  | -1.44054830864502  | N | -1.958047342309750 | -1.958047342309750 | -1.28794695872729   | H | -4.50703769170371  | -0.22919172382626  | -0.39249912091101  |
| N | -1.33320506506549 | -7.19026570313763  | -1.18475916541252  | N | -3.02703130060532  | -2.796677956156742 | -1.1771101542759660 | H | -4.60541462696660  | 0.05764540112813   | 0.236584028171813  |
| N | -2.74298794572919 | 1.66014967482047   | -5.94371561198865  | N | -2.9113156144763   | 2.79067383530525   | -5.64951091415811   | H | -2.34291644759218  | -6.00137410301229  | -1.8125284111069   |
| C | -1.78240070142469 | 1.2992973118853    | 7.07535181795498   | C | -1.9803854259721   | -1.9803854259721   | -1.9803854259721    | H | -1.9803854259721   | -1.9803854259721   | -1.9803854259721   |
| N | -2.44275850725343 | 6.19509798204319   | 1.55624436790333   | N | -1.96714682961915  | 6.61541447675805   | 1.04304633403452    | H | -2.64727971114503  | -0.67159464002454  | -0.17369948436095  |
| N | -1.41364645720891 | 7.2042318752731    | 1.28731655220891   | N | -3.04274225729185  | 0.97261684262070   | 0.96310506929406    | H | -4.76656915705915  | -0.22191712382626  | -0.39249912091101  |
| N | -3.62914875741278 | 0.43181179696068   | -4.38468289124165  | N | -3.79194350365901  | 0.97261684262070   | -4.2134713353261    | H | -4.9789305220296   | 1.0269796769145    | -4.32380295808856  |
| N | -2.90322143430837 | 1.7833949647031    | 6.67471011778662   | N | -3.05850602740711  | -2.60694824653673  | 1.95402592942032    | H | -4.54758049090291  | -0.14578049090291  | -0.14578049090291  |
| N | -3.4264424849233  | -4.6685796179946   | -5.0112952089551   | H | -3.072187453963    | -5.95896059107075  | -2.177701153175     | H | -2.9558402527046   | 1.52116071943168   | -0.96699497110393  |
| N | -2.6699329193625  | -5.7748511942780   | 0.62163025933913   | N | -3.20553552641288  | -5.54274991156154  | -0.44176122421875   | H | -1.56068039260031  | 0.44512123474130   | -5.90451567612041  |
| N | -3.4697711519121  | -0.584978100714060 | 4.583474569917342  | N | -3.53648575366016  | -2.04448248641897  | 4.52972543304709    | H | -3.11899041286637  | -0.1722213180178   | -6.4522268419784   |
| N | -2.7476061809534  | 1.2992973118853    | 7.07535181795498   | N | -3.4946230746633   | 4.82062465164518   | 4.82062465164518    | H | 1.8596365273231    | -3.13131313131313  | -4.13247140909010  |
| N | -3.4993871826590  | 4.666766335916     | 0.63998672162437   | N | 5.0602391698047    | 1.845890529242032  | 1.845890529242032   | H | -1.07843849171544  | -0.9992421962035   | -1.88920256991190  |
| N | -2.7793963277429  | 5.7883446996741    | -0.50175341834237  | H | -3.8511344419825   | 5.1693805531997    | 0.1568438499028     | H | -1.7676666530173   | -6.89843309007093  | 1.61662701734361   |
| C | -3.6864207395029  | 6.84241091112682   | 1.93060808019450   | C | -1.1201060759948   | 6.89631477157461   | 2.15908948162435    | H | -4.0747782483321   | -6.81493969760403  | 1.5128725033030    |
| C | -3.63642052778929 | -8.55442012971240  | -1.783660248740817 | C | -1.08472675877841  | -4.5945959990311   | -2.36798124259978   | C | 2.98026209699413   | 6.31136375816225   | -4.4064863472703   |
| C | -0.607162430394   | 1.7833949647031    | 6.67471011778662   | C | -2.5648626139494   | -2.5648626139494   | -2.5648626139494    | H | -2.347423996536201 | -0.8846987992407   | -3.88469917474739  |
| C | -1.22017670049228 | 8.0879122859757    | 2.49482125716895   | C | -2.24842489066841  | 8.902539066032     | 0.88133213706192    | C | 1.80348112189392   | 2.45927194693158   | 6.7329877352288    |
| N | -2.46891923908325 | 2.748891973413043  | 2.86444802765217   | N | -1.63777307777192  | 2.86444802765217   | 2.03174603074403    | C | 3.68206567892926   | 3.6918197539609    |                    |
